# Supplementary material for: Modulation of the coordination geometries of NCN and NCNC Rh complexes for ambidextrous chiral catalysts
Source: Royal Society of Chemistry journal article supplement (doi:10.1039/c9cc06520b), 2019-01-01
Supplement: c9cc06520b1.pdf [file c9cc06520b1.pdf]

Electronic Supplementary Information

Modulation of Coordination Geometry of NCN and NCNC Rh Complexes for  
Ambidextrous Chiral Catalysts

Jun-ichi Ito, Takahiro Ishihara, Takaki Fukuoka, Binti Mat Napi Siti Rokiah,

Hajime Kameo and Hisao Nishiyama

Contents:

|                                                                         |     |
|-------------------------------------------------------------------------|-----|
| 1. General Procedure.                                                   | S2  |
| 2. Preparation of ligand precursors and Rh complexes.                   | S2  |
| 3. Asymmetric alkynylation of ethyl trifluoropyruvate with alkynes.     | S9  |
| 4. X-ray analysis of <b>2a</b> , <b>2b</b> , <b>3a</b> , and <b>4</b> . | S17 |
| 5. DFT calculation.                                                     | S22 |
| 6. References.                                                          | S29 |
| 7. NMR charts.                                                          | S30 |

## 1. General Procedure.

All air- and moisture-sensitive compounds were manipulated using standard Schlenk and vacuum line techniques under an argon atmosphere.  $^1\text{H}$ ,  $^{13}\text{C}$  and  $^{19}\text{F}$  NMR spectra was measured at room temperature on a Varian Mercury 300 spectrometer.  $^1\text{H}$  NMR chemical shifts are reported in  $\delta$  units, in ppm relative to the singlet at 7.26 for  $\text{CDCl}_3$  and 7.16 ppm for  $\text{C}_6\text{D}_6$  and  $^{13}\text{C}$  NMR chemical shifts are reported relative to the triplet at 77.0 ppm for  $\text{CDCl}_3$  and 128.0 ppm for  $\text{C}_6\text{D}_6$ .  $^{19}\text{F}$  NMR spectra are reported in terms of chemical shifts relative to the external signal of  $\text{CF}_3\text{COOH}$  at  $\delta -78.5$  ppm. Infrared spectra were recorded on a JASCO FT/IR-230 spectrometer. Mass spectra were recorded on a JEOL JMS-700. Elemental analyses were recorded on a YANACO MT-6 and a PerkinElmer 2400II.

## 2. Preparation of ligand precursors and Rh complexes.

### Preparation of 1,5-bis(chloromethyl)-2,4-dimethylbenzene.<sup>[S1]</sup>

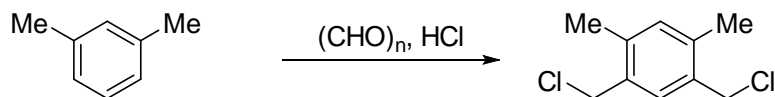

A mixture of m-xylene (20 mL, 163 mmol) and para-formaldehyde (11.6 g, 400 mmol) in acetic acid (40 mL) and HCl (160 mL) was stirred at 70 °C for 2 days. The resulting suspension was extracted with  $\text{CH}_2\text{Cl}_2$  (50 mL x 5) and the extract was washed with saturated  $\text{NaHCO}_3$  solution (50 mL x 4), water (50 mL x 2) and brine (50 mL) and dried over  $\text{MgSO}_4$ . After filtration, the solvent was removed and the residue was crystallized from hexane to give 1,5-bis(chloromethyl)-2,4-dimethylbenzene (21.8 g, 110 mmol, 67%) as colorless crystals.  $^1\text{H}$  NMR (300 MHz,  $\text{C}_6\text{D}_6$ ):  $\delta$  6.76 (s, 1H), 6.59 (s, 1H), 4.07 (s, 4H), 2.03 (s, 6H).  $^{13}\text{C}$  NMR (75 MHz,  $\text{C}_6\text{D}_6$ ):  $\delta$  138.2, 134.1, 133.6, 131.9, 44.7, 18.5.

### Preparation of 1.

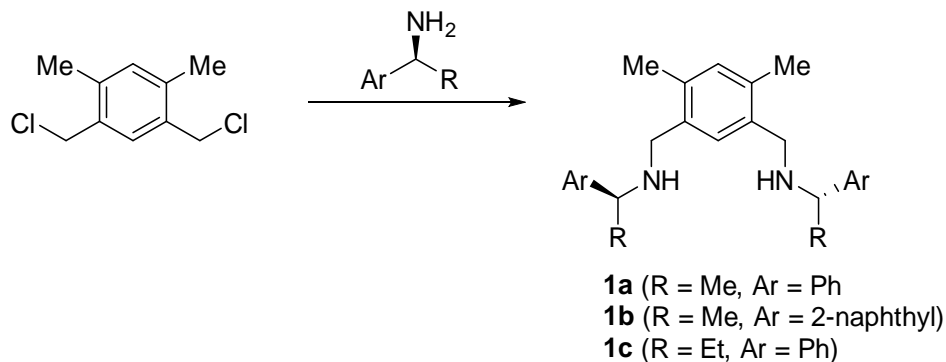

To a mixture 1,5-bis(chloromethyl)-2,4-dimethylbenzene (2.01 g, 9.9 mmol), (*S*)-1-phenylethylamine (2.66 g, 22.0 mmol), and K<sub>2</sub>CO<sub>3</sub> (5.52 g, 40 mmol) was added DMF (20 ml). The reaction mixture was heated at 100 °C for 2.5 h. Then, the mixture was diluted with ethyl acetate (100 ml) and the solution was washed with 5% of potassium carbonate and brine. The organic layer was dried with sodium sulfate and was concentrated. The crude product was purified by column chromatography on silica gel (eluent; hexane:ethyl acetate = 4:2 with 2% of NEt<sub>3</sub>) to give **1a** (2.41 g, 6.5 mmol, 65 % yield). The use of (*S*)-1-(naphthalene-1-yl)ethylamine (1.02 g, 6.0 mmol) and (*S*)-1-phenylpropan-1-amine (1.02 g, 5.0 mmol) afforded **1b** (877 mg, 1.97 mmol, 66%) and **1c** (1.71 g, 4.27 mmol, 85%), respectively.

**1a**: Colorless solid. <sup>1</sup>H NMR (300 MHz, CDCl<sub>3</sub>, rt): δ 1.38 (d, *J* = 6.6 Hz, 6H), 2.22 (s, 6H), 3.56 (s, 4H), 3.84 (q, *J* = 6.6 Hz, 2H), 6.92 (s, 1H), 7.10 (s, 1H), 7.27-7.40 (m, 10H). <sup>13</sup>C NMR (75 MHz, CDCl<sub>3</sub>, rt): δ 18.6, 24.8, 49.5, 58.2, 126.5, 126.7, 128.2, 129.0, 132.1, 134.6, 135.6, 145.5. IR (KBr, cm<sup>-1</sup>): 3231, 3027, 2964, 2923, 2860, 2802, 1490, 1454, 1377, 1110, 1018, 841. Anal. Calcd for C<sub>26</sub>H<sub>32</sub>N<sub>2</sub>: C, 83.82; H, 8.66; N, 7.52, found: C, 83.63; H, 8.67; N, 7.15. HRMS (FAB, *m/z*) calcd for C<sub>26</sub>H<sub>32</sub>N<sub>2</sub> 372.2644[M+H<sup>+</sup>], found 372.2651. [α]<sub>D</sub><sup>18</sup> = -44.2 (c 0.99, CHCl<sub>3</sub>).

**1b**: Colorless solid. <sup>1</sup>H NMR (300 MHz, CDCl<sub>3</sub>, rt): δ 1.58 (d, *J* = 6.6 Hz, 6H), 2.32 (s, 6H), 3.69 (d, *J* = 6.6 Hz, 2H), 3.77 (d, *J* = 6.6 Hz, 2H), 4.75 (q, *J* = 6.6 Hz, 2H), 7.02 (s, 1H), 7.18 (s, 1H), 7.50-7.58 (m, 6H), 7.82 (d, *J* = 7.8 Hz, 4 H), 7.92-7.95 (m, 2H), 8.21-8.24 (m, 2H). <sup>13</sup>C NMR (75 MHz, CDCl<sub>3</sub>, rt): δ 18.5, 23.7, 49.4, 53.3, 122.5, 122.5, 122.6, 124.8, 125.2, 125.3, 126.7, 128.5, 129.0, 130.8, 131.9, 133.5, 134.5, 135.4, 140.6. IR (KBr, cm<sup>-1</sup>): 3426, 3046, 2965, 2921, 2863, 1735, 1594, 1509, 1450, 1369, 1237, 1172, 1113. Anal. Calcd for C<sub>34</sub>H<sub>36</sub>N<sub>2</sub>: C, 86.40; H, 7.68; N, 5.93, found: C, 86.30; H, 7.72; N, 5.94. HRMS (FAB, *m/z*) calcd for C<sub>34</sub>H<sub>38</sub>N<sub>2</sub> 473.2957 [M+H<sup>+</sup>], found 473.2963.

$[\alpha]_D^{26} = -39.2$  (c 1.0,  $\text{CHCl}_3$ ).

**1c**: colorless oil.  $^1\text{H}$  NMR (300 MHz,  $\text{CDCl}_3$ , rt): 0.88 (t,  $J = 7.4$  Hz, 6 H), 1.52 (br, 2H), 1.64-1.88 (m, 4H), 2.26 (s, 6H), 3.52-3.63 (m, 6H), 6.97 (s, 1H), 7.14 (s, 1H), 7.28-7.40 (m, 10H).  $^{13}\text{C}$  NMR (75 Hz,  $\text{CDCl}_3$ , rt): 11.1, 18.6, 31.3, 49.5, 65.0, 126.7, 127.2, 128.0, 129.2, 132.1, 134.7, 135.7, 144.0. IR (KBr,  $\text{cm}^{-1}$ ): 3322, 3060, 2024, 2961, 2926, 2872, 1601, 1454, 1357, 1117, 759, 701. Anal. Calcd for  $\text{C}_{28}\text{H}_{36}\text{N}_2$ : C, 83.95; H, 9.06; N, 6.99, found: C, 83.66; H, 9.45; N, 6.87.  $[\alpha]_D^{25} = -47.3$  (c 1.0,  $\text{CHCl}_3$ ).

### Preparation of 2.

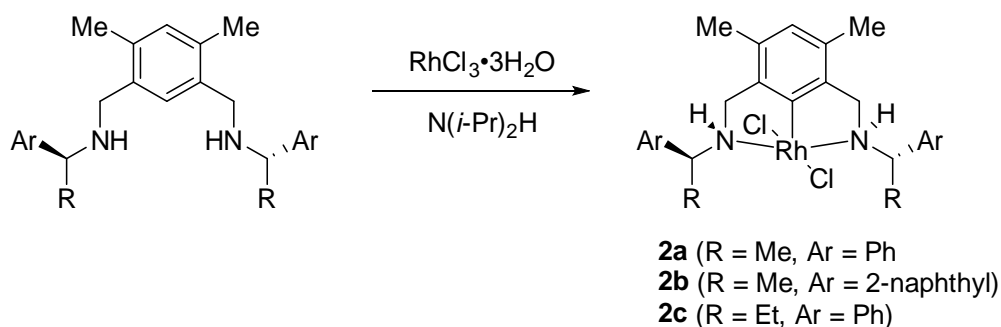

To a mixture of **1a** (373 mg, 1.0 mmol) and  $\text{RhCl}_3 \cdot 3\text{H}_2\text{O}$  (263 mg, 1.0 mmol) was added diisopropylamine (5 ml) and then the reaction mixture was refluxed for 24 h. The crude product was purified by column chromatography on silica gel (eluent; chloroform) to give **2a** (355 mg, 0.65 mmol, 65% yield). **1b** (444 mg, 1.0 mmol)/ $\text{RhCl}_3 \cdot 3\text{H}_2\text{O}$  (263 mg, 1.0 mmol) and **1c** (409 mg, 1.0 mmol)/ $\text{RhCl}_3 \cdot 3\text{H}_2\text{O}$  (296 mg, 1.1 mmol) gave **2b** (447 mg, 0.69 mmol, 69%) and **2c** (228 mg, 0.40 mmol, 40%), respectively.

**2a**:  $^1\text{H}$  NMR (300 MHz,  $\text{CDCl}_3$ , rt):  $\delta$  1.97 (d,  $J = 6.9$  Hz, 6H), 1.99 (s, 6H), 3.60 (dd,  $J = 5.6, 14.2$  Hz, 2H), 3.84 (dd,  $J = 11.1, 14.2$  Hz, 2H), 4.39 (dq,  $J = 11.1, 6.9$  Hz, 2H), 4.75 (br, 2H, N-H), 6.41 (s, 1H), 7.34-7.49 (m, 10H).  $^{13}\text{C}$  NMR (75 MHz,  $\text{CDCl}_3$ , rt):  $\delta$  18.9, 23.5, 55.7, 62.2, 126.3, 127.2, 128.4, 129.1, 131.0, 136.4, 139.9, 145.7 (d,  $J_{\text{RhC}} = 30.8$  Hz). IR (KBr,  $\text{cm}^{-1}$ ): 3226 ( $\nu_{\text{NH}}$ ), 3000, 2952, 2911, 1604, 1550, 1495, 1455, 1379, 1202, 1078, 1028. Anal. Calcd for  $\text{C}_{26}\text{H}_{31}\text{Cl}_2\text{N}_2\text{Rh}$ : C, 57.26; H, 5.73; N, 5.14, found: C, 57.13; H, 5.73; N, 4.86. HRMS (FAB,  $m/z$ ) calcd for  $\text{C}_{26}\text{H}_{31}\text{Cl}_2\text{N}_2\text{Rh}$  [ $\text{M}^+$ ] 544.0919, found 544.0925.  $[\alpha]_D^{18} = 27.1$  (c 0.3,  $\text{CHCl}_3$ ).

**2b**:  $^1\text{H}$  NMR (300 MHz,  $\text{CDCl}_3$ , rt):  $\delta$  1.89 (s, 6H), 2.10 (d,  $J = 6.6$  Hz, 6H), 3.71 (dd,  $J = 4.2, 15.0$  Hz, 2H), 3.88 (dd,  $J = 9.6, 15.0$  Hz, 2H), 5.10 (br, 2H, N-H), 5.52 (dq,  $J = 11.1, 6.6$  Hz, 2H), 6.37 (s,

1H), 7.56-7.67 (m, 8H), 7.90-7.97 (m, 4H), 8.24 (d,  $J = 8.7$  Hz, 2H).  $^{13}\text{C}$  NMR (75 MHz,  $\text{CDCl}_3$ , rt): d 19.0, 24.4, 55.6, 55.8, 121.9, 122.1, 125.5, 125.8, 126.1, 126.8, 127.3, 128.5, 128.9, 131.0, 133.7, 136.5, 136.6, 146.0 (d,  $J_{\text{RhC}} = 30.8$  Hz). IR (KBr,  $\text{cm}^{-1}$ ): 3228 ( $\nu_{\text{NH}}$ ), 2916, 2855, 1598, 1557, 1511, 1452, 1377, 1172, 1106, 1065. Anal. Calcd for  $\text{C}_{34}\text{H}_{35}\text{Cl}_2\text{N}_2\text{Rh}$ : C, 63.27; H, 5.47; N, 4.34, found: C, 63.40; H, 5.47; N, 4.30. HRMS (FAB,  $m/z$ ) calcd for  $\text{C}_{34}\text{H}_{35}\text{Cl}_2\text{N}_2\text{Rh}$  644.1232 [ $\text{M}^+$ ], found 644.1234.  $[\alpha]_{\text{D}}^{27} = 39.1$  (c 0.66,  $\text{CHCl}_3$ ).

**2c**:  $^1\text{H}$  NMR (300 MHz,  $\text{CDCl}_3$ , rt): 1.05 (t,  $J = 7.2$  Hz, 6H), 1.96 (s, 6H), 2.01-2.14 (m, 2H), 2.61-2.74 (m, 2H), 3.55 (ddd,  $J = 2.3, 4.3, 14.3$  Hz, 2H), 3.82 (dd,  $J = 10.2, 14.3$  Hz, 2H), 4.15 (dt,  $J = 5.1, 10.8$  Hz, 2H), 4.78 (br, 2H), 6.41 (s, 1H), 7.31-7.45 (m, 10H).  $^{13}\text{C}$  NMR (75 MHz,  $\text{CDCl}_3$ , rt): 11.7, 18.9, 30.7, 55.8, 68.4, 127.0, 127.2, 128.3, 129.0, 131.0, 136.8, 138.3, 147.2 (d,  $J = 30.8$  Hz). IR (KBr,  $\text{cm}^{-1}$ ): 3228 ( $\nu_{\text{NH}}$ ), 3024, 2965, 2935, 2876, 1606, 1559, 1454, 1178, 1086, 1034, 971, 852, 702. Anal. Calcd for  $\text{C}_{28}\text{H}_{35}\text{Cl}_2\text{N}_2\text{Rh}$ : C, 58.65; H, 6.15; N, 4.89, found: C, 58.71; H, 6.22; N, 4.87.  $[\alpha]_{\text{D}}^{27} = 0.6$  (c 0.33,  $\text{CHCl}_3$ ).

### Preparation of 3.

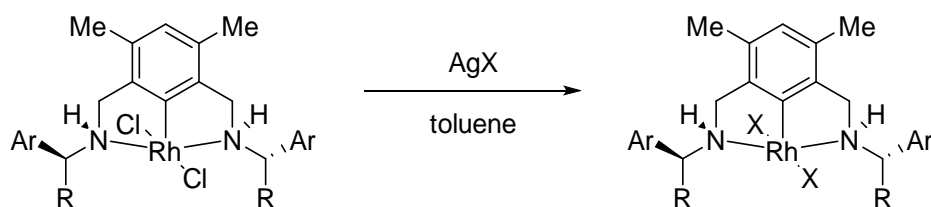

- 3a**: Ar = Ph, R = Me, X = OAc (88%)  
**3a'**: Ar = Ph, R = Me, X = OCOtBu (90%)  
**3b**: Ar = 1-naphthyl, R = Me, X = OAc (75%)  
**3c**: Ar = Ph, R = Et, X = OAc (83%)

To a mixture of **2a** (160 mg, 0.292 mmol) and silver acetate (249 mg, 1.49 mmol) was added toluene and the reaction mixture was stirred at room temperature for 37 h. The crude product was purified by column chromatography on silica gel (eluent: hexane:ethyl acetate = 2:1) to give **3a** (152 mg, 0.256 mmol, 88% yield). Reaction of **2b** (194 mg, 0.30 mmol) and AgOAc (251 mg, 1.5 mmol) at room temperature for 36 h gave **3b** (156 mg, 0.23 mmol, 75%). Reaction of **2c** (114.7 mg, 0.20 mmol) and AgOAc (166.9 mg, 1.0 mmol) at room temperature for 46 h gave **3c** (103.6 mg, 0.17 mmol, 83%). Reaction of **2a** (133 mg, 0.24 mmol) and AgOCOtBu (255 mg, 1.23 mmol) gave **3a'** (143 mg, 0.22

mol, 90%).

**3a:**  $^1\text{H}$  NMR (300 MHz,  $\text{CDCl}_3$ , rt):  $\delta$  1.97 (d,  $J = 6.8$  Hz, 6H), 1.98 (s, 3H), 1.98 (s, 6H), 3.44-3.65 (m, 4H), 3.96 (dq,  $J = 10.1, 6.8$  Hz, 2H), 6.41 (s, 1H), 7.31-7.45 (m, 10H), 7.78 (m, 2H, N-H).  $^{13}\text{C}$  NMR (75 MHz,  $\text{CDCl}_3$ , rt):  $\delta$  19.0, 23.5, 24.1, 55.1, 61.2, 126.126.6, 127.0, 127.8, 128.9, 130.1, 138.0, 141.0, 154.2 ( $J_{\text{RhC}} = 31.9$  Hz), 183.2. IR (KBr,  $\text{cm}^{-1}$ ): 3030, 2924, 1588 ( $\nu_{\text{CO}}$ ), 1495, 1455, 1375, 1321, 1087, 1027. Anal. Calcd for  $\text{C}_{30}\text{H}_{37}\text{N}_2\text{O}_4\text{Rh}$ : C, 60.81; H, 6.29; N, 4.73, found: C, 60.24; H, 6.38; N, 4.21. HRMS (FAB,  $m/z$ ) calcd for  $\text{C}_{30}\text{H}_{37}\text{N}_2\text{O}_4\text{Rh}$  592.1808 [ $\text{M}^+$ ], found 592.1808.  $[\alpha]_{\text{D}}^{18} = -210.1$  (c 0.35,  $\text{CHCl}_3$ ).

**3a':**  $^1\text{H}$  NMR (300 MHz,  $\text{CDCl}_3$ , rt): 1.17 (s, 18H), 1.93 (d,  $J = 6.6$  Hz, 6H), 1.97 (s, 6H), 3.47-3.61 (m, 4H), 3.96 (dq,  $J = 6.9, 11.0$  Hz, 2H), 6.39 (s, 1H), 7.32-7.44 (m, 10H), 7.64 (br, 2H).  $^{13}\text{C}$  NMR (75 MHz,  $\text{CDCl}_3$ , rt): 19.0, 23.3, 28.2, 39.6 ( $J_{\text{RhC}} = 1.1$  Hz), 55.3, 60.9, 126.5, 126.6, 127.8, 128.9, 129.8, 138.1, 141.0, 156.2 ( $J_{\text{RhC}} = 31.4$  Hz), 190.9 ( $J_{\text{RhC}} = 1.1$  Hz). IR (KBr,  $\text{cm}^{-1}$ ): 3592, 3063, 2953, 1596, 1479, 1394, 1332, 1214, 1109, 1026, 764, 702. Anal. Calcd for  $\text{C}_{36}\text{H}_{49}\text{N}_2\text{O}_4\text{Rh}$ : C, 63.90; H, 7.30; N, 4.14, found: C, 64.07; H, 7.54; N, 4.02.  $[\alpha]_{\text{D}}^{24} = -187.9$  (c 0.76,  $\text{CHCl}_3$ ).

**3b:**  $^1\text{H}$  NMR (300 MHz,  $\text{CDCl}_3$ , rt):  $\delta$  1.60 (s, 6H), 2.13 (s, 6H), 2.28 (d,  $J = 6.9$  Hz, 6H), 3.68 (dd,  $J = 3.5, 14.1$  Hz, 2H), 3.93 (dd,  $J = 10.4, 14.1$  Hz, 2H), 4.39 (dq,  $J = 10.4, 6.9$  Hz, 2H), 6.31 (s, 1H), 7.20-7.30 (m, 4H), 7.54-7.72 (m, 10H), 9.01 (br, 2H).  $^{13}\text{C}$  NMR (75 MHz,  $\text{CDCl}_3$ , rt): 19.0, 23.5, 24.1, 55.2, 61.4, 123.6, 126.0, 126.1, 126.3, 127.0, 127.58, 127.63, 129.1, 130.2, 132.9, 133.1, 138.0, 138.3, 154.4 ( $J_{\text{RhC}} = 32.0$  Hz), 183.4. IR (KBr,  $\text{cm}^{-1}$ ): 3053, 2927, 1581, 1376, 1324, 1174, 1129, 1082, 858, 749. Anal. Calcd for  $\text{C}_{38}\text{H}_{41}\text{N}_2\text{O}_4\text{Rh}$ : C, 65.89; H, 5.97; N, 4.04, found: C, 65.83; H, 5.90; N, 4.01.  $[\alpha]_{\text{D}}^{27} = -112.4$  (c 0.34,  $\text{CHCl}_3$ ).

**3c:**  $^1\text{H}$  NMR (300 MHz,  $\text{CDCl}_3$ , rt): 0.97 (t,  $J = 7.2$  Hz, 6H), 1.89-2.02 (m, 2H), 1.95 (s, 6H), 1.95 (s, 6H), 2.85-2.99 (m, 2H), 3.45-3.57 (m, 4H), 3.71 (dt,  $J = 4.8, 10.5$  Hz, 2H), 6.40 (s, 1H), 7.32-7.44 (m, 10H), 8.43 (br, 2H).  $^{13}\text{C}$  NMR (75 Hz,  $\text{CDCl}_3$ , rt): 11.8, 19.0, 24.2 ( $J_{\text{RhC}} = 1.2$  Hz), 30.0, 54.6, 126.9, 127.4, 127.7, 128.7, 130.0, 138.3, 139.1, 153.8 ( $J_{\text{RhC}} = 32.6$  Hz), 183.1. IR (KBr,  $\text{cm}^{-1}$ ): 3064, 2965, 2931, 2877, 1584, 1454, 1375, 1322, 1169, 1016, 854, 773, 702. Anal. Calcd for  $\text{C}_{32}\text{H}_{41}\text{N}_2\text{O}_4\text{Rh}$ : C, 61.93; H, 6.66; N, 4.51, found: C, 61.45; H, 6.64; N, 4.51.  $[\alpha]_{\text{D}}^{27} = -214.9$  (c 0.38,  $\text{CHCl}_3$ ).

## Preparation of **4**.

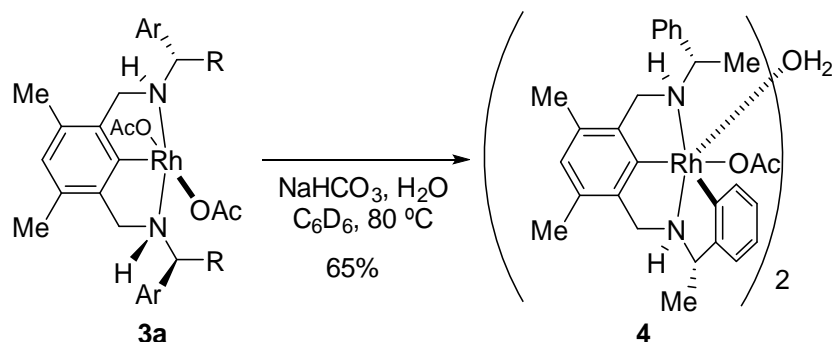

To a mixture of **3a** (59.5 mg, 0.10 mmol) and NaHCO<sub>3</sub> (84.1 mg, 0.10 mmol) was added benzene-*d*<sub>6</sub> (0.7 mL). The solution was heated at 80 °C for 70 h. After centrifugation of the mixture, the solvent was removed under reduced pressure. The residue was crystallization with hexane and CH<sub>2</sub>Cl<sub>2</sub> to give yellow crystals of **4** (35.2 mg, 0.033 mmol, 65% yield).

<sup>1</sup>H NMR (300 MHz, C<sub>6</sub>D<sub>6</sub>, rt): δ 1.70 (s, 3H), 1.72 (d, *J* = 6.9 Hz, 3H), 1.75 (d, *J* = 7.5 Hz, 3H), 1.76 (s, 3H), 2.38 (s, 3H), 3.40 (d, *J* = 16.2 Hz, 1H), 3.53-3.69 (m, 2H), 3.93 (dd, *J* = 10.2, 15.0 Hz, 1H), 4.04-4.19 (m, 2H), 4.60-4.72 (br, 2H), 6.26 (s, 1H), 6.78-6.83 (m, 3H), 6.95-7.08 (m, 5H), 7.32 (d, *J* = 7.8 Hz, 1H). <sup>1</sup>H NMR (300 MHz, CDCl<sub>3</sub>, rt): δ 1.66 (d, *J* = 6.9 Hz, 3H), 1.67 (d, *J* = 6.6 Hz, 3H), 1.90 (s, 3H), 1.96 (s, 3H), 2.08 (s, 3H), 3.68-3.78 (m, 1H), 3.83-3.99 (m, 3H), 4.47 (br, 1H), 4.06-4.24 (m, 2H), 4.63 (dq, *J* = 8.3, 16.4 Hz, 2H), 6.22 (s, 1H), 6.86-6.94 (m, 3H), 7.13 (br, 1H), 7.34-7.48 (m, 5H). <sup>13</sup>C NMR (75 MHz, C<sub>6</sub>D<sub>6</sub>, rt): δ 19.48, 19.51, 24.6, 25.6, 26.1, 60.1, 63.8, 64.2, 72.8, 122.0, 122.9, 125.3, 125.5, 126.7, 128.8, 129.0, 129.1, 135.2, 138.4, 141.6, 142.0, 152.9 (d, *J*<sub>RhC</sub> = 37.7 Hz), 154.9, 163.0 (d, *J*<sub>RhC</sub> = 32.5 Hz), 183.9. IR (KBr, cm<sup>-1</sup>): 3253, 3222, 2971, 2920, 1588 (ν<sub>CO</sub>), 1495, 1455, 1375, 1321, 1087, 1027. Anal. Calcd for C<sub>56</sub>H<sub>68</sub>N<sub>4</sub>O<sub>5</sub>Rh<sub>2</sub>: C, 62.11; H, 6.33; N, 5.17, found: C, 62.05; H, 6.86; N, 5.08.

The heating reaction of **3a** in benzene-*d*<sub>6</sub> at 80 °C was monitored by <sup>1</sup>H NMR spectroscopy (Figure S1). In the absence of K<sub>2</sub>CO<sub>3</sub>, equilibrium mixtures of **3a** and **4** were obtained. In contrast, reaction in the presence of K<sub>2</sub>CO<sub>3</sub> resulted in the full conversion of **3a**.

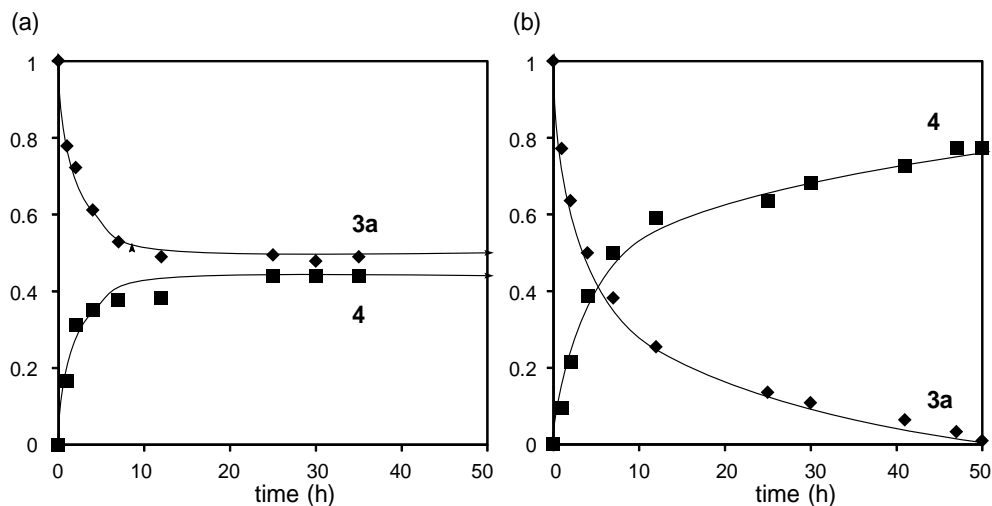

**Figure S1.** Time conversion curves. Heating of **3a** in benzene- $d_6$  at 80 °C (a) in the absence of  $K_2CO_3$  and (b) in the presence of  $K_2CO_3$ .

### Preparation of **8**.

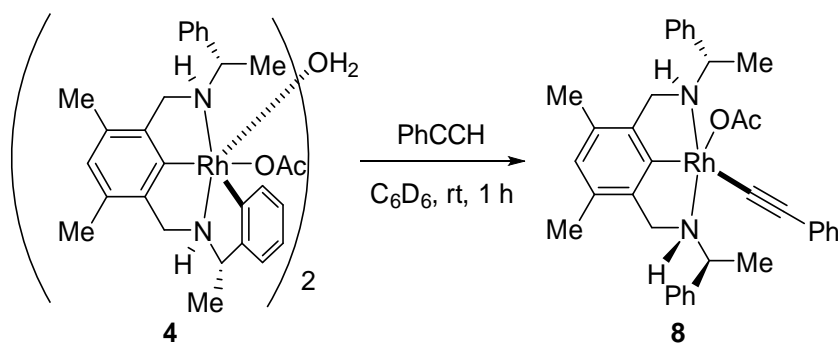

To a solution of **4** (23.6 mg, 0.022 mmol) in toluene (2 mL) was added PhCCH (24  $\mu$ L, 0.22 mmol). The solution was stirred at room temperature for 3 h and was concentrated in reduced pressure. The residue was washed with hexane to give **8** as a yellow solid (23.7 mg, 0.037 mmol, 86% yield).

$^1H$  NMR (300 MHz,  $C_6D_6$ , rt):  $\delta$  1.20 (d,  $J = 6.6$  Hz, 3H), 1.60 (s, 3H), 1.61 (d,  $J = 5.1$  Hz, 3H), 1.97 (s, 3H), 2.02 (s, 3H), 3.69-3.99 (m, 4H), 4.29-4.51 (m, 2H), 6.00 (brs, 1H), 6.38 (s, 1H), 6.90-7.34 (m, 11H), 7.55-7.58 (m, 2H), 7.83 (d,  $J = 7.2$  Hz, 2H), 8.40 (br, 1H);  $^{13}C$  NMR (75 MHz,  $C_6D_6$ , rt): 19.0, 19.3, 19.5, 23.7, 25.8, 57.3, 57.4, 63.4, 64.3, 98.9 (d,  $J_{RhC} = 58.1$  Hz), 105.2 (d,  $J_{RhC} = 11.4$  Hz), 125.2, 126.5, 127.2, 128.6, 129.2, 129.3, 129.8, 130.4, 131.8, 136.9, 138.4, 141.8, 142.3, 154.6 (d,  $J_{RhC} = 35.3$  Hz), 181.2; IR (KBr,  $cm^{-1}$ ): 3225, 3031, 2930, 2859, 2104 ( $\nu_{CC}$ ), 1571, 1387, 1085, 1027, 757, 701; Anal. Calcd for  $C_{36}H_{39}N_2O_2Rh$ : C, 68.13; H, 6.19; N, 4.41, found: C, 68.06; H, 6.30; N, 4.18.



### 3. Asymmetric alkynylation of ethyl trifluoropyruvate with alkynes

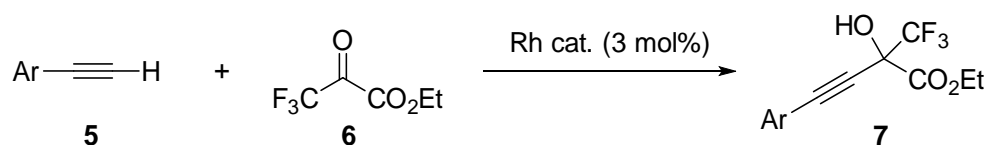

A mixture of alkyne (0.3 mmol) and ketone (0.2 mmol) in the presence of Rh catalysts (3 mol%) was stirred under an argon atmosphere. After removal of the solvent, a crude product was purified by column chromatography on silica gel with hexane/ethyl acetate to give **7**.

**Table S1.** Asymmetric alkynylation of ethyl trifluoropyruvate with phenylacetylene.<sup>a</sup>

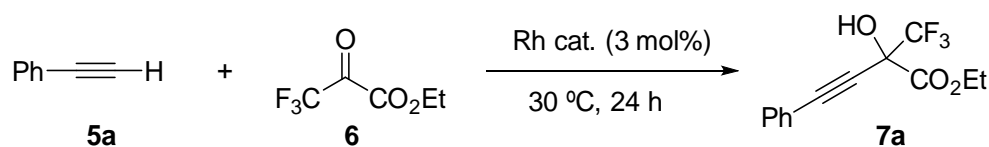

| entry | cat        | solvent           | temp | yield (%) | ee (%) <sup>b</sup> |
|-------|------------|-------------------|------|-----------|---------------------|
| 1     | <b>3a</b>  | Et <sub>2</sub> O | 30   | 72        | 63 ( <i>R</i> )     |
| 2     | <b>3a</b>  | toluene           | 30   | 45        | 67 ( <i>R</i> )     |
| 3     | <b>3a</b>  | THF               | 30   | 3         | 53 ( <i>R</i> )     |
| 4     | <b>3a</b>  | Et <sub>2</sub> O | 0    | <1        | –                   |
| 5     | <b>3b</b>  | Et <sub>2</sub> O | 30   | 75        | 69 ( <i>R</i> )     |
| 6     | <b>3c</b>  | Et <sub>2</sub> O | 30   | 3         | 40 ( <i>R</i> )     |
| 7     | <b>3a'</b> | Et <sub>2</sub> O | 30   | <1        | –                   |
| 8     | <b>4</b>   | Et <sub>2</sub> O | 30   | 81        | 36 ( <i>S</i> )     |
| 9     | <b>4</b>   | Et <sub>2</sub> O | 15   | 71        | 42 ( <i>S</i> )     |
| 10    | <b>4</b>   | Et <sub>2</sub> O | 0    | 57        | 66 ( <i>S</i> )     |
| 11    | <b>4</b>   | toluene           | 0    | 8         | 57 ( <i>S</i> )     |

<sup>a</sup> Reaction condition: **5a** (0.3 mmol), **6** (0.2 mmol), catalysts (3 mol%), solvent (2 mL), 30 °C, 24 h. <sup>b</sup>

Determined by HPLC.

**Table S2.** Asymmetric alkylation of ethyl trifluoropyruvate **6** with alkynes **5**.<sup>a</sup>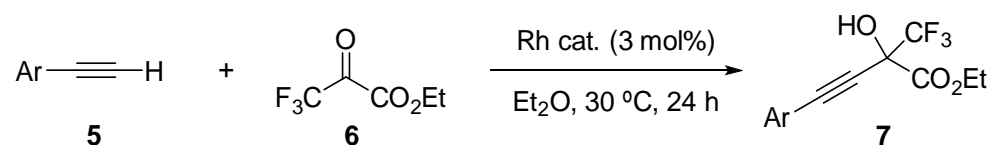

| Entry           | RCCH                                                           | cat       | Temp, time | yield (%) | ee (%) <sup>b</sup> |
|-----------------|----------------------------------------------------------------|-----------|------------|-----------|---------------------|
| 1               | 4-CF <sub>3</sub> C <sub>6</sub> H <sub>4</sub> ( <b>5b</b> )  | <b>3a</b> | 30, 24     | 58        | 85 (+)              |
| 2               | 4-CF <sub>3</sub> C <sub>6</sub> H <sub>4</sub> ( <b>5b</b> )  | <b>4</b>  | -20, 48    | 22        | 46 (-)              |
| 3               | 4-BrC <sub>6</sub> H <sub>4</sub> ( <b>5c</b> )                | <b>3a</b> | 30, 24     | 72        | 79 (+)              |
| 4               | 4-BrC <sub>6</sub> H <sub>4</sub> ( <b>5c</b> )                | <b>4</b>  | -20, 48    | 8         | 79 (-)              |
| 5               | 4-BrC <sub>6</sub> H <sub>4</sub> ( <b>5c</b> )                | <b>4</b>  | 0, 24      | 62        | 9 (-)               |
| 6               | 9-phenanthrene ( <b>5d</b> )                                   | <b>3a</b> | 30, 24     | 67        | 68 (+)              |
| 7               | 9-phenanthrene ( <b>5d</b> )                                   | <b>4</b>  | -20, 48    | 31        | 21 (-)              |
| 8               | 4-CH <sub>3</sub> C <sub>6</sub> H <sub>4</sub> ( <b>5e</b> )  | <b>3a</b> | 30, 24     | 0         | N.D. <sup>d</sup>   |
| 9 <sup>c</sup>  | 4-CH <sub>3</sub> C <sub>6</sub> H <sub>4</sub> ( <b>5e</b> )  | <b>4</b>  | 0, 24      | 54        | 66 (+)              |
| 10              | 4-CH <sub>3</sub> C <sub>6</sub> H <sub>4</sub> ( <b>5e</b> )  | <b>4</b>  | 0, 45      | 50        | 69 (-)              |
| 11              | 4-CH <sub>3</sub> OC <sub>6</sub> H <sub>4</sub> ( <b>5f</b> ) | <b>3a</b> | 30, 24     | 0         | N.D. <sup>d</sup>   |
| 12 <sup>c</sup> | 4-CH <sub>3</sub> OC <sub>6</sub> H <sub>4</sub> ( <b>5f</b> ) | <b>4</b>  | 0, 24 h    | 64        | 75 (+)              |
| 13              | 4-CH <sub>3</sub> OC <sub>6</sub> H <sub>4</sub> ( <b>5f</b> ) | <b>4</b>  | 0, 24 h    | 23        | 57 (-)              |

<sup>a</sup> Reaction condition: **5** (0.3 mmol), **6** (0.3 mmol), catalysts (3 mol%), Et<sub>2</sub>O (2 mL), 30 °C, 24 h. <sup>b</sup>

Determined by HPLC. <sup>c</sup> Pretreatment of **4** with **5e**, **f** at room temperature for 12 h before addition of

**6**. <sup>d</sup> Not determined.

## Ethyl 2-hydroxy-4-phenyl-2-(trifluoromethyl)but-3-ynoate (**7a**)<sup>[S2]</sup>

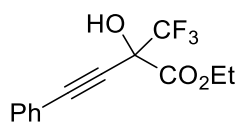

<sup>1</sup>H NMR (300 MHz, CDCl<sub>3</sub>, rt): δ 1.40 (t, *J* = 7.2 Hz, 3H), 4.31 (bs, 1H), 4.38-4.55 (m, 2H), 7.31-7.42 (m, 3H), 7.49-7.53 (m, 2H). <sup>13</sup>C NMR (75 MHz, CDCl<sub>3</sub>, rt): δ 13.8, 65.1, 71.7 (q, *J*<sub>CF</sub> = 34 Hz), 79.7, 87.2, 120.6, 121.7 (*J*<sub>CF</sub> = 284 Hz), 128.4, 129.6, 132.2, 166.5. <sup>19</sup>F NMR (162 MHz, CDCl<sub>3</sub>, rt): δ -79.1. HRMS (FAB, *m/z*) calcd for C<sub>13</sub>H<sub>11</sub>F<sub>3</sub>O<sub>3</sub> 273.0739 [M+H<sup>+</sup>], found 273.0736.

2175 2175 2016/09/29 21:30:31

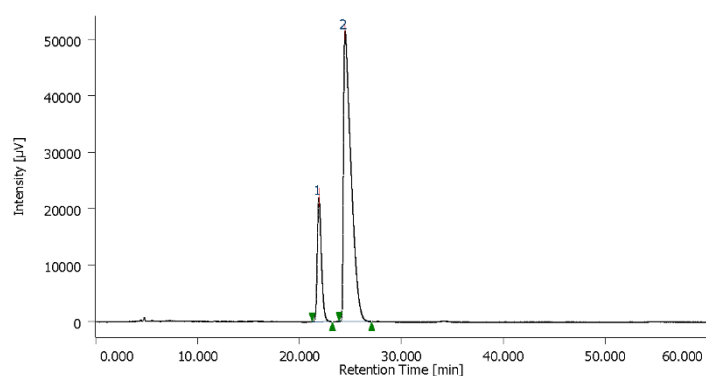

| # | tR [min] | area [μV·sec] | area%  |
|---|----------|---------------|--------|
| 1 | 21.917   | 617142        | 18.891 |
| 2 | 24.480   | 2649701       | 81.109 |

**Figure S2.** HPLC chart (Daicel CHIRLPAK AD-H, hexane:*i*PrOH = 99:1, 1.0 mL/min, 271 nm) of **7a** (Table 1, entry 1).  $[\alpha]_D^{26} = -32.1$  (c 1.0, CHCl<sub>3</sub>). (lit.<sup>[S2]</sup>  $[\alpha]_D^{29} = -44.6$  (c = 1.01, CHCl<sub>3</sub>, 99 % ee (*R*)).

1964-3 1964 2016/09/29 19:14:08

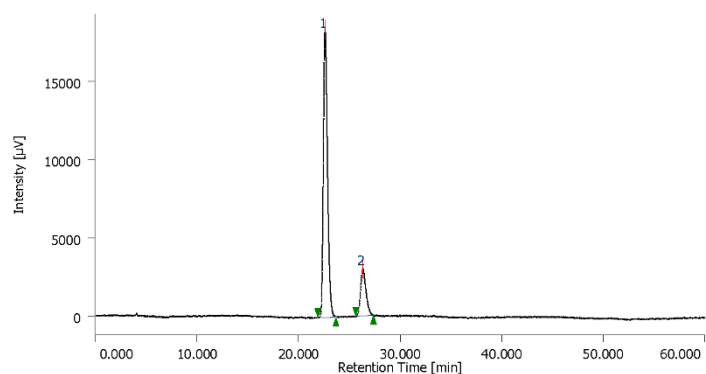

| # | tR [min] | area [μV·sec] | area%  |
|---|----------|---------------|--------|
| 1 | 22.625   | 525999        | 82.883 |
| 2 | 26.345   | 108628        | 17.117 |

**Figure S3.** HPLC chart of **7a** (Table 1, entry 5).  $[\alpha]_D^{28} = +33.3$  (c 1.0, CHCl<sub>3</sub>).

## Ethyl 2-hydroxy-2-(trifluoromethyl)-4-(4-(trifluoromethyl)phenyl)but-3-ynoate (**7b**)

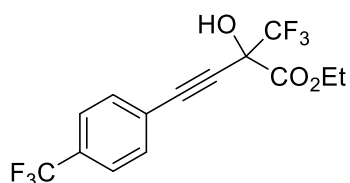

$^1\text{H}$  NMR (300 MHz,  $\text{CDCl}_3$ , rt):  $\delta$  1.41 (t,  $J = 7.2$  Hz, 3H), 4.36 (s, 1H), 4.40-4.57 (m, 2H), 7.61 (s, 4H).  $^{13}\text{C}$  NMR (75 MHz,  $\text{CDCl}_3$ , rt):  $\delta$  14.1, 65.3, 71.7 (q,  $J_{\text{CF}} = 34$  Hz), 81.9, 85.5, 121.4 ( $J_{\text{CF}} = 284$  Hz), 123.5 ( $J_{\text{CF}} = 270$  Hz), 124.2, 125.2 ( $J_{\text{CF}} = 4$  Hz), 131.2 ( $J_{\text{CF}} = 33$  Hz), 132.3, 165.8.  $^{19}\text{F}$  NMR (162 MHz,  $\text{CDCl}_3$ , rt):  $\delta$  -63.9, -78.9. HRMS (FAB,  $m/z$ ) calcd for  $\text{C}_{14}\text{H}_{10}\text{F}_6\text{O}_3$  341.0612 [ $\text{M}+\text{H}^+$ ], found 341.0618.

1928-2 1928 2015/12/21 20:33:47

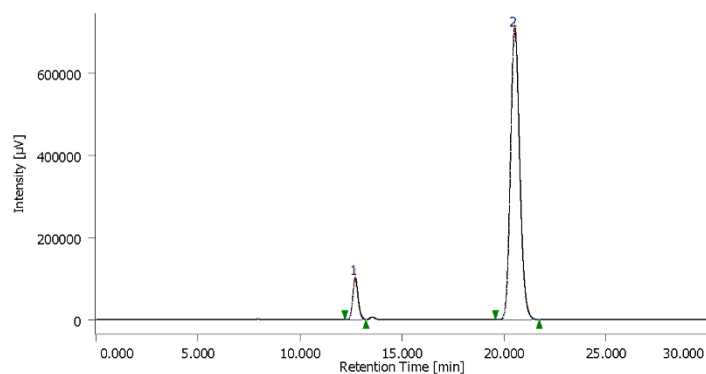

| # | tR [min] | area [μV·sec] | area%  |
|---|----------|---------------|--------|
| 1 | 12.710   | 1809257       | 7.491  |
| 2 | 20.515   | 22343360      | 92.509 |

**Figure S4.** HPLC chart (Daicel CHIRLPAK AD-H, hexane:*i*PrOH = 95:5, 1.0 mL/min, 254 nm) of **7b** (Table 2, entry 1),  $[\alpha]_{\text{D}}^{27} = -38.0$  (c 0.23,  $\text{CHCl}_3$ ).

2019 2019 2015/12/21 19:53:50

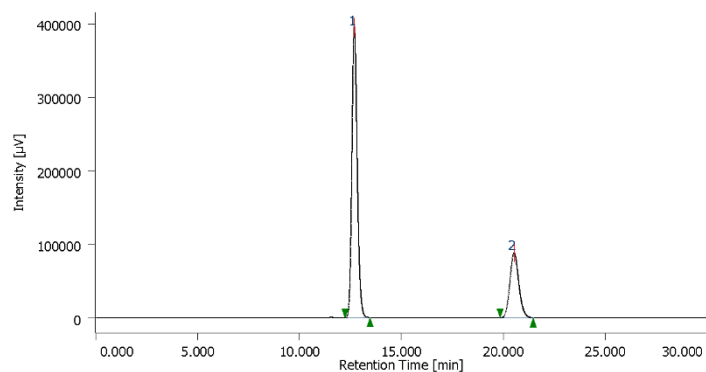

| # | tR [min] | area [μV·sec] | area%  |
|---|----------|---------------|--------|
| 1 | 12.690   | 7205200       | 73.028 |
| 2 | 20.527   | 2661140       | 26.972 |

**Figure S5.** HPLC chart of **7b** (Table 2, entry 2),  $[\alpha]_{\text{D}}^{24} = +22.8$  (c 1.1,  $\text{CHCl}_3$ ).

**Ethyl 4-(4-bromophenyl)-2-hydroxy-2-(trifluoromethyl)but-3-ynoate (7c)** [S2]

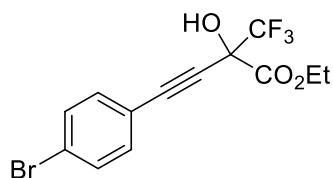

$^1\text{H}$  NMR (300 MHz,  $\text{CDCl}_3$ , rt):  $\delta$  1.40 (t,  $J = 7.2$  Hz, 3H), 4.33 (bs, 1H), 4.39-4.56 (m, 2H), 7.34-7.38 (m, 2H), 7.46-7.50 (m, 2H).  $^{13}\text{C}$  NMR (75 MHz,  $\text{CDCl}_3$ , rt):  $\delta$  14.0, 65.2, 71.7 (q,  $J_{\text{CF}} = 34$  Hz), 80.7, 86.0, 115.8, 119.3, 121.4 ( $J_{\text{CF}} = 284$  Hz), 124.0 131.5, 133.3, 165.9.  $^{19}\text{F}$  NMR (162 MHz,  $\text{CDCl}_3$ , rt):  $\delta$  -78.9. HRMS (FAB,  $m/z$ ) calcd for  $\text{C}_{13}\text{H}_{16}\text{BrF}_3\text{O}_3$  350.9844 [ $\text{M}+\text{H}^+$ ], found 350.9847.

1917-2 1917 2015/12/18 20:21:29

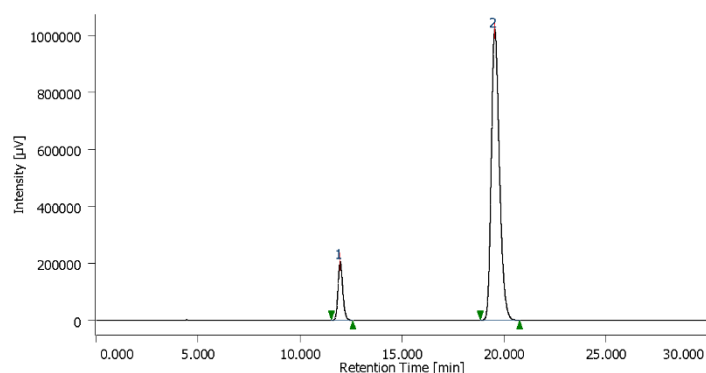

| # | tR [min] | area [μV·sec] | area%  |
|---|----------|---------------|--------|
| 1 | 11.967   | 3293534       | 10.415 |
| 2 | 19.542   | 28330947      | 89.585 |

**Figure S6.** HPLC chart (Daicel CHIRLPAK AD-H, hexane:*i*PrOH = 99:1, 1.0 mL/min, 254 nm) of **7c** (Table 2, entry 3),  $[\alpha]_{\text{D}}^{26} = -34.4$  (c 1.1,  $\text{CHCl}_3$ ).

2016 2012 2015/12/18 19:43:31

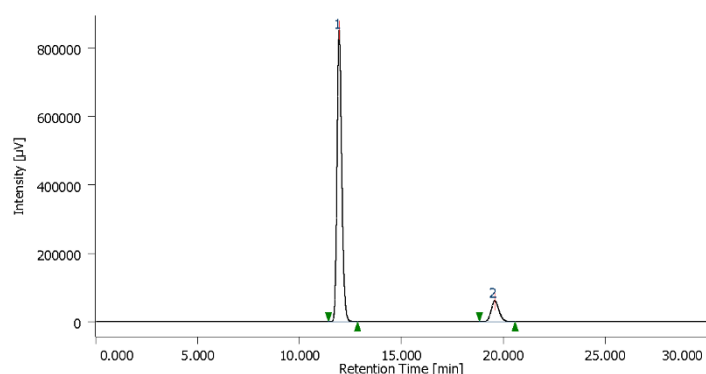

| # | tR [min] | area [μV·sec] | area%  |
|---|----------|---------------|--------|
| 1 | 11.942   | 13756026      | 89.288 |
| 2 | 19.583   | 1650371       | 10.712 |

**Figure S7.** HPLC chart of **7c** (Table 2, entry 4),  $[\alpha]_{\text{D}}^{17} = +37.2$  (c 0.51,  $\text{CHCl}_3$ ).

## Ethyl 2-hydroxy-4-(phenanthren-9-yl)-2-(trifluoromethyl)but-3-ynoate (7d)

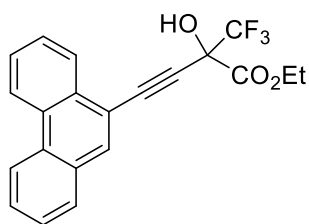

$^1\text{H}$  NMR (300 MHz,  $\text{CDCl}_3$ , rt):  $\delta$  1.48 (t,  $J = 7.1$  Hz, 3H), 4.50 (s, 1H), 4.50-4.59 (m, 2H), 7.58-7.73 (m, 4H), 7.83-7.86 (m, 1H), 8.07 (s, 1H), 8.34-8.37 (m, 1H), 8.61-8.68 (m, 2H).  $^{13}\text{C}$  NMR (75 MHz,  $\text{CDCl}_3$ , rt):  $\delta$  14.1, 65.2, 72.0 (q,  $J_{\text{CF}} = 34$  Hz), 83.9, 85.8, 116.8, 121.7 ( $J_{\text{CF}} = 284$  Hz), 122.4, 122.6, 126.2, 126.9, 127.06, 127.08, 128.0, 128.6, 129.7, 130.4, 130.48, 130.52, 133.3, 166.2.  $^{19}\text{F}$  NMR (162 MHz,  $\text{CDCl}_3$ , rt):  $\delta$  -78.7. HRMS (FAB,  $m/z$ ) calcd for  $\text{C}_{21}\text{H}_{15}\text{F}_3\text{O}_3$  372.0973 [ $\text{M}^+$ ], found 372.0963.

1948-2 1948 2015/12/24 13:06:58

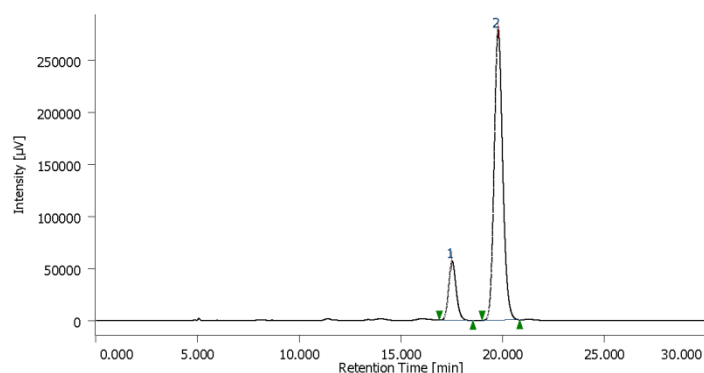

| # | tR [min] | area [μV·sec] | area%  |
|---|----------|---------------|--------|
| 1 | 17.508   | 1459658       | 15.174 |
| 2 | 19.768   | 8159608       | 84.826 |

**Figure S8.** HPLC chart (Daicel CHIRLPAK AD-H, hexane:*i*PrOH = 95:5, 1.0 mL/min, 254 nm) of **7d** (Table 2, entry 5),  $[\alpha]_{\text{D}}^{27} = -35.9$  (c 1.0,  $\text{CHCl}_3$ ).

2023 2023 2015/12/24 13:07:42

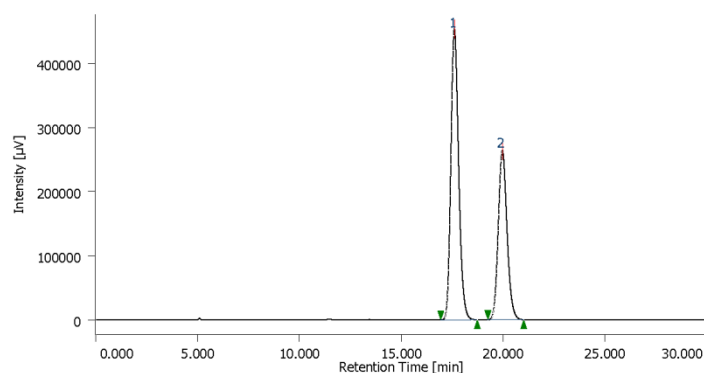

| # | tR [min] | area [μV·sec] | area%  |
|---|----------|---------------|--------|
| 1 | 17.607   | 12027678      | 60.408 |
| 2 | 19.958   | 7883068       | 39.592 |

**Figure S9.** HPLC chart of **7d** (Table 2, entry 6),  $[\alpha]_{\text{D}}^{24} = +13.1$  (c 1.4,  $\text{CHCl}_3$ ).

## Ethyl 2-hydroxy-4-(p-tolyl)-2-(trifluoromethyl)but-3-ynoate (7e) <sup>[S2]</sup>

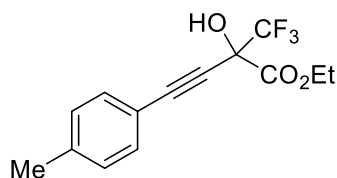

<sup>1</sup>H NMR (300 MHz, CDCl<sub>3</sub>, rt): δ 1.41 (t, *J* = 7.2 Hz, 3H), 2.37 (s, 3H), 4.27 (s, 1H), 4.39-4.55 (m, 2H), 7.14 (d, *J* = 8.1 Hz, 2H), 7.39 (d, *J* = 8.1 Hz, 2H). <sup>13</sup>C NMR (75 MHz, CDCl<sub>3</sub>, rt): δ 14.1, 21.8, 65.0, 71.7 (q, *J*<sub>CF</sub> = 34 Hz), 79.0, 87.3, 117.4, 121.6 (*J*<sub>CF</sub> = 283 Hz), 128.9, 131.9, 139.8, 166.2. <sup>19</sup>F NMR (162 MHz, CDCl<sub>3</sub>, rt): δ -79.0. HRMS (FAB, *m/z*) calcd for C<sub>14</sub>H<sub>13</sub>F<sub>3</sub>O<sub>3</sub> 286.0717 [M<sup>+</sup>], found 287.0906.

2015 2015 2015/12/16 18:53:20

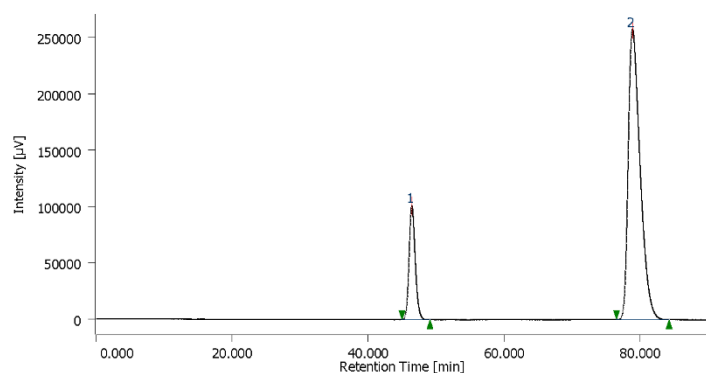

| # | tR [min] | area [μV·sec] | area%  |
|---|----------|---------------|--------|
| 1 | 46.433   | 6306719       | 16.832 |
| 2 | 78.857   | 31161425      | 83.168 |

**Figure S10.** HPLC chart (Daicel CHIRLPAK AD-H, hexane:*i*PrOH = 99:1, 1.0 mL/min, 254 nm) of **7e** (Table 2, entry 7),  $[\alpha]_D^{20} = -34.2$  (c 1.1, CHCl<sub>3</sub>).

2014 2014-3 2015/12/16 18:52:37

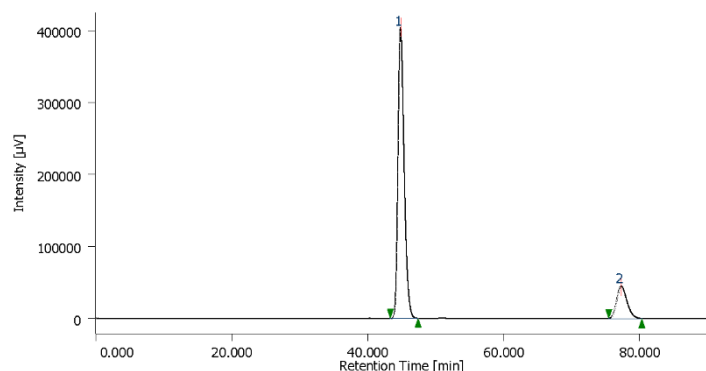

| # | tR [min] | area [μV·sec] | area%  |
|---|----------|---------------|--------|
| 1 | 44.812   | 25515407      | 84.441 |
| 2 | 77.267   | 4701264       | 15.559 |

**Figure S11.** HPLC chart of **7e** (Table 2, entry 8),  $[\alpha]_D^{20} = +39.5$  (c 0.89, CHCl<sub>3</sub>).

## Ethyl 2-hydroxy-4-(4-methoxyphenyl)-2-(trifluoromethyl)but-3-ynoate (**7f**) [S2]

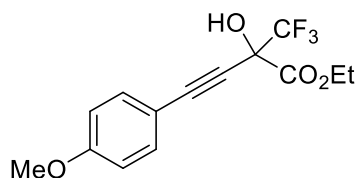

$^1\text{H}$  NMR (300 MHz,  $\text{CDCl}_3$ , rt):  $\delta$  1.39 (t,  $J = 7.1$  Hz, 3H), 3.81 (s, 3H), 4.32 (br, 1H), 4.37-4.54 (m, 2H), 6.82-6.87 (m, 2H), 7.41-7.46 (m, 2H).  $^{13}\text{C}$  NMR (75 MHz,  $\text{CDCl}_3$ , rt):  $\delta$  13.8, 55.3, 64.9, 71.7 (q,  $J_{\text{CF}} = 34$  Hz), 78.4, 87.3, 112.6, 114.0, 121.8 ( $J_{\text{CF}} = 284$  Hz), 133.7, 160.5, 166.6.  $^{19}\text{F}$  NMR (162 MHz,  $\text{CDCl}_3$ , rt):  $\delta$  -79.1. HRMS (FAB,  $m/z$ ) calcd for  $\text{C}_{14}\text{H}_{13}\text{F}_3\text{O}_4$  302.0766 [ $\text{M}^+$ ], found 302.0768.

2027 2027 2015/12/28 14:06:25

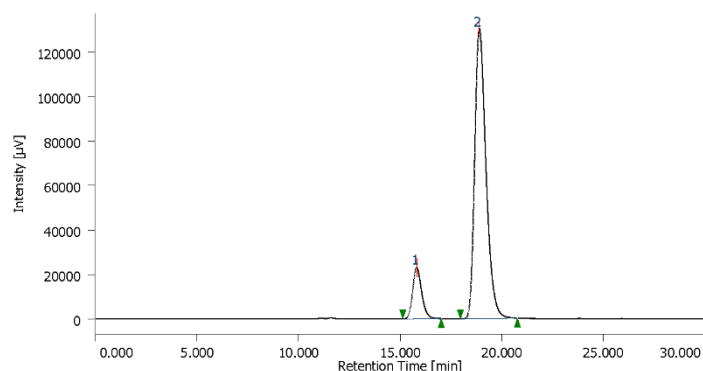

| # | tR [min] | area [μV·sec] | area%  |
|---|----------|---------------|--------|
| 1 | 15.823   | 699128        | 12.233 |
| 2 | 18.902   | 5016151       | 87.767 |

**Figure S12.** HPLC chart of **7f** (Table 2, entry 9),  $[\alpha]_{\text{D}}^{21} = -37.5$  (c 1.1,  $\text{CHCl}_3$ ).

2028 2028 2015/12/28 14:46:53

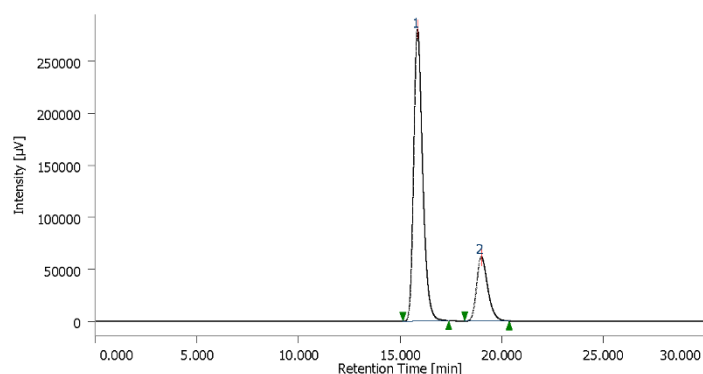

| # | tR [min] | area [μV·sec] | area%  |
|---|----------|---------------|--------|
| 1 | 15.858   | 8589660       | 78.668 |
| 2 | 19.002   | 2329206       | 21.332 |

**Figure S13.** HPLC chart of **7f** (Table 2, entry 10),  $[\alpha]_{\text{D}}^{21} = +29.9$  (c 1.2,  $\text{CHCl}_3$ ).



#### 4. X-ray analysis of 2a, 2b, 3a, and 4.

The diffraction data of **2b** and **3a** were collected on a Bruker SMART APEX CCD diffractometer with graphite monochromated Mo $\text{K}\alpha$  radiation ( $\lambda = 0.71073 \text{ \AA}$ ) and the diffraction data of **2a** and **4** were collected on a Bruker D8 QUEST CCD diffractometer with graphite-monochromated Mo  $\text{K}\alpha$  radiation ( $\lambda = 0.71073 \text{ \AA}$ ). An empirical absorption correction was applied by using SADABS. The structure was solved by direct method and refined by full-matrix least-square on  $F^2$  using SHELXTL. All non-hydrogen atoms were refined with anisotropic displacement parameters. All hydrogen atom were located on calculated positions and refined as rigid groups. CCDC 1507453 (**2a**), CCDC 1507454 (**2b**), CCDC 1507455 (**3a**) and CCDC 1507456 (**4**) contain the supplementary crystallographic data for this paper.

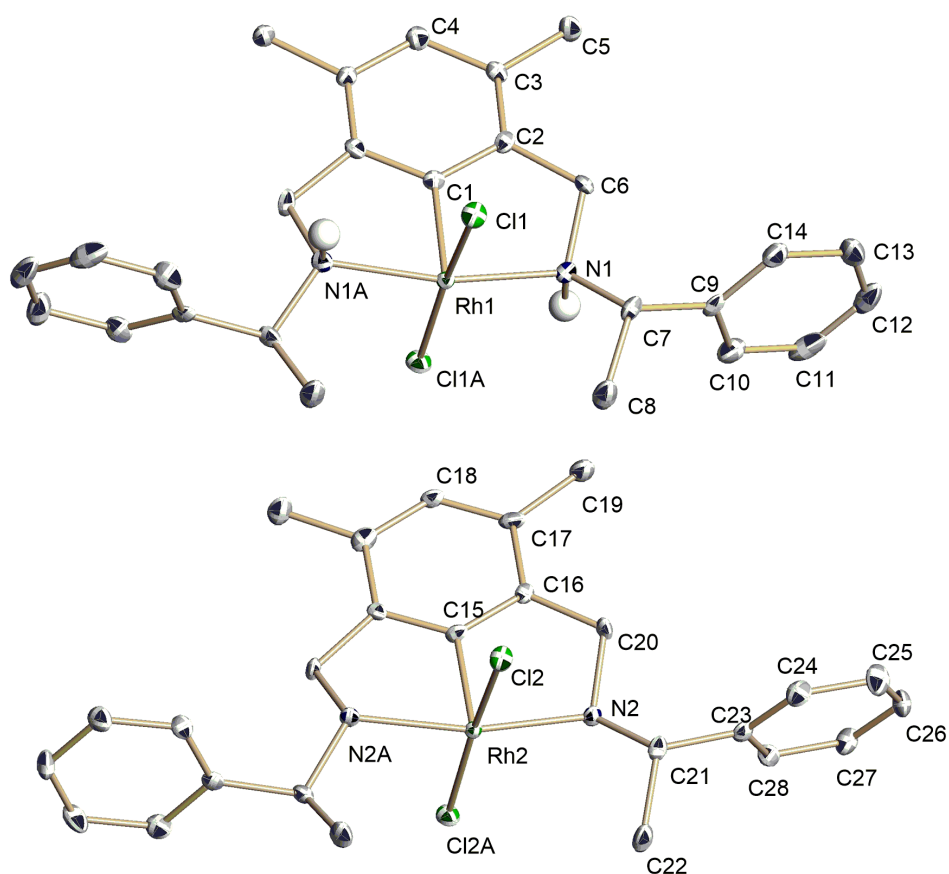

**Figure S15.** ORTEP diagram of **2a** with 50% probability level. Selected bond lengths ( $\text{\AA}$ ) and angles ( $^\circ$ ). Rh1-C1 1.909(8), Rh1-N1 2.076(4), Rh1-Cl1 2.3117(10), Rh2-C15 1.919(8), Rh2-N2 2.086(4), Rh2-Cl2 2.3092(10), N1-Rh1-N1 166.2(2), Cl1-Rh1-Cl1 172.37(7), C1-Rh1-N1 83.09(11), C1-Rh1-Cl1 93.82(4), N2-Rh2-N2 165.5(2), Cl2-Rh2-Cl2 173.05(8), C15-Rh2-N2 82.74(10), C15-Rh2-Cl2 93.47(4).

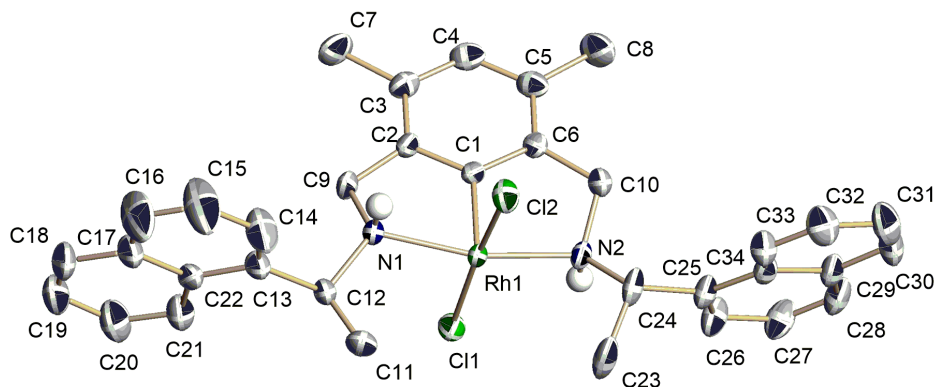

**Figure S16.** ORTEP diagram of **2b** with 50% probability level. Selected bond lengths (Å) and angles (°). Rh1-C1 1.902(2), Rh1-N1 2.080(2), Rh1-N2 2.0841(17), Rh1-C11 2.3254(7), Rh1-Cl2 2.3152(7), N1-Rh1-N2 165.69(8), Cl1-Rh1-Cl2 173.27(3), C1-Rh1-N1 82.89(9), C1-Rh1-N2 82.86(9), C1-Rh1-C11 93.09(8), C1-Rh1-Cl2 93.58(8).

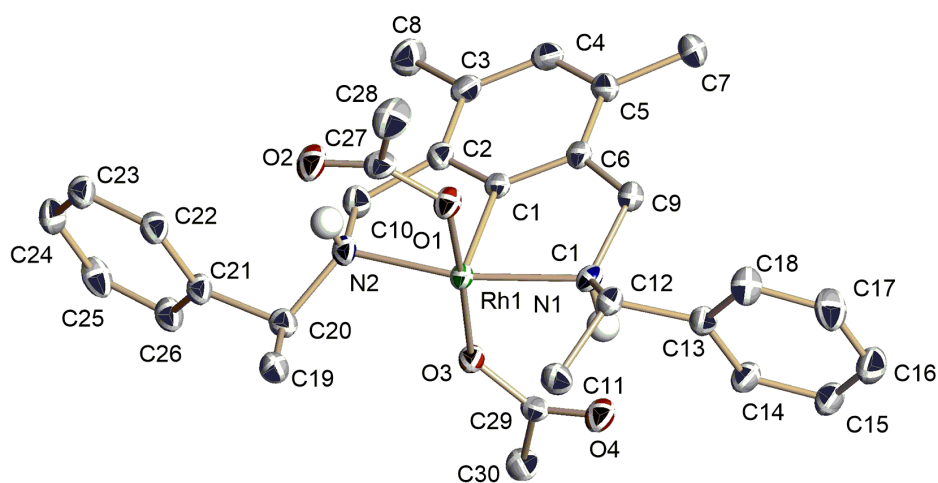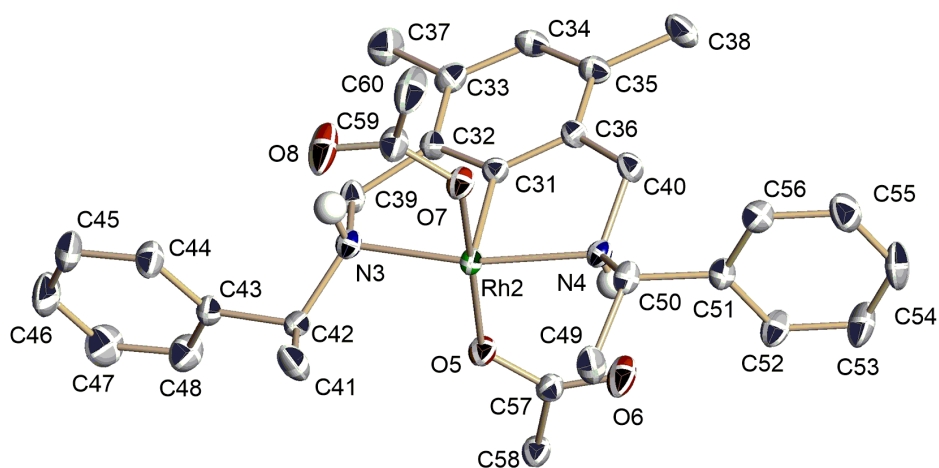

**Figure S17.** ORTEP diagram of **3a** with 50% probability level. Selected bond lengths (Å) and angles (°). Rh1-C1 1.904(3), Rh1-N1 2.085(3), Rh1-N2 2.072(3), Rh1-O1 2.037(2), Rh1-O3 2.030(2), Rh2-C31 1.901(3), Rh2-N3 2.090(3), Rh2-N4 2.073(3), Rh2-O5 2.037(2), Rh2-O7 2.026(2), N1-Rh1-N2 166.05(11), O1-Rh1-O3 174.80(9), C1-Rh1-N1 82.86(13), C1-Rh1-N2 83.19(13), C1-Rh1-O1 94.71(12), C1-Rh1-O3 90.48(12), N3-Rh2-N4 165.57(12), O5-Rh2-O7 174.06(10), C31-Rh2-N3 82.30(14), C31-Rh2-N4 83.28(13), C31-Rh2-O5 93.49(12), C31-Rh2-O7 92.32(12).

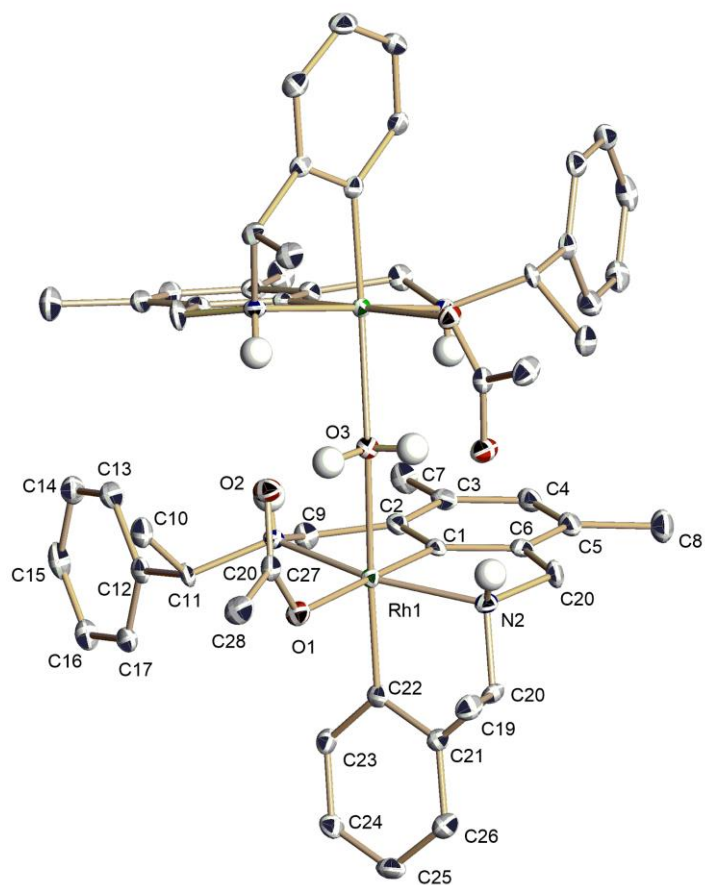

**Figure S18.** ORTEP diagram of **4** with 50% probability level. Selected bond lengths (Å) and angles (°). Rh1-C1 1.919(3), Rh1-C22 1.985(3), Rh1-N1 2.138(3), Rh1-N2 2.104(3), Rh1-O1 2.234(2), Rh1-O3 2.2807(6), N1-Rh1-N2 163.94(10), C1-Rh1-O1 178.12(10), C22-Rh1-O3 172.26(12), Rh1-O3-Rh1 159.76(15).

**Table S3.** Crystallographic Data for complexes **2a**, **2b**, **3a** and **4**.

|                                               | <b>2a</b>                                                         | <b>2b</b>                                                         |
|-----------------------------------------------|-------------------------------------------------------------------|-------------------------------------------------------------------|
| Empirical formula                             | C <sub>26</sub> H <sub>31</sub> Cl <sub>2</sub> N <sub>2</sub> Rh | C <sub>34</sub> H <sub>35</sub> Cl <sub>2</sub> N <sub>2</sub> Rh |
| Formula weight                                | 545.34                                                            | 645.45                                                            |
| Temperature, K                                | 93                                                                | 153                                                               |
| Crystal system                                | Monoclinic                                                        | Monoclinic                                                        |
| Space group                                   | C2                                                                | C2                                                                |
| a, Å                                          | 16.4067(10)                                                       | 20.2556(16)                                                       |
| b, Å                                          | 17.1103(11)                                                       | 12.2123(10)                                                       |
| c, Å                                          | 10.8096(7)                                                        | 13.0390(11)                                                       |
| α, deg                                        |                                                                   |                                                                   |
| β, deg                                        | 127.0881(14)                                                      | 111.6700(10)                                                      |
| γ, deg                                        |                                                                   |                                                                   |
| V, Å <sup>3</sup>                             | 2420.7(3)                                                         | 2997.5(4)                                                         |
| Z                                             | 4                                                                 | 4                                                                 |
| D <sub>calcd</sub> , g cm <sup>-3</sup>       | 1.496                                                             | 1.430                                                             |
| μ(MoKα), mm <sup>-1</sup>                     | 0.942                                                             | 0.774                                                             |
| Reflections collected                         | 8335                                                              | 11188                                                             |
| Independent reflections                       | 4104 [R(int) = 0.0253]                                            | 7310 [R(int) = 0.0238]                                            |
| parameters                                    | 292                                                               | 364                                                               |
| GOF                                           | 1.290                                                             | 1.045                                                             |
| R1 [ <i>I</i> >2σ( <i>I</i> )]                | 0.0253                                                            | 0.0280                                                            |
| wR2 [ <i>I</i> >2σ( <i>I</i> )]               | 0.0761                                                            | 0.0669                                                            |
| R1 (all data)                                 | 0.0255                                                            | 0.0295                                                            |
| wR2 (all data)                                | 0.0766                                                            | 0.0677                                                            |
| Largest diff. peak and hole, eÅ <sup>-3</sup> | 0.991 and -0.856                                                  | 1.029 and -0.267                                                  |

**Table S3.** Continued.

|                                               | <b>3a</b>                                                           | <b>4</b>                                                            |
|-----------------------------------------------|---------------------------------------------------------------------|---------------------------------------------------------------------|
| Empirical formula                             | C <sub>32</sub> H <sub>42</sub> N <sub>2</sub> O <sub>4.50</sub> Rh | C <sub>28</sub> H <sub>34</sub> N <sub>2</sub> O <sub>2.50</sub> Rh |
| Formula weight                                | 629.59                                                              | 541.48                                                              |
| Temperature, K                                | 123                                                                 | 123                                                                 |
| Crystal system                                | Triclinic                                                           | Orthorhombic                                                        |
| Space group                                   | <i>P</i> 1                                                          | <i>P</i> 2 <sub>1</sub> 2 <sub>1</sub> 2                            |
| a, Å                                          | 8.797(4)                                                            | 12.3574(6)                                                          |
| b, Å                                          | 12.138(5)                                                           | 17.1055(8)                                                          |
| c, Å                                          | 15.509(6)                                                           | 11.4148(6)                                                          |
| α, deg                                        | 89.798(7)                                                           |                                                                     |
| β, deg                                        | 86.468(7)                                                           |                                                                     |
| γ, deg                                        | 70.434(7)                                                           |                                                                     |
| V, Å <sup>3</sup>                             | 1557.2(11)                                                          | 2412.9(2)                                                           |
| Z                                             | 2                                                                   | 2                                                                   |
| D <sub>calcd</sub> , g cm <sup>-3</sup>       | 1.343                                                               | 1.488                                                               |
| μ(MoKα), mm <sup>-1</sup>                     | 0.587                                                               | 0.738                                                               |
| Reflections collected                         | 11142                                                               | 16600                                                               |
| Independent reflections                       | 8980 [R(int) = 0.0361]                                              | 4265 [R(int) = 0.0366]                                              |
| parameters                                    | 735                                                                 | 319                                                                 |
| GOF                                           | 1.042                                                               | 1.370                                                               |
| R1 [ <i>I</i> >2σ( <i>I</i> )]                | 0.0348                                                              | 0.0210                                                              |
| wR2 [ <i>I</i> >2σ( <i>I</i> )]               | 0.0900                                                              | 0.0549                                                              |
| R1 (all data)                                 | 0.0352                                                              | 0.0214                                                              |
| wR2 (all data)                                | 0.0905                                                              | 0.0551                                                              |
| Largest diff. peak and hole, eÅ <sup>-3</sup> | 1.259 and -0.470                                                    | 0.472 and -0.295                                                    |

## 5. DFT calculation.

DFT Calculations of **2a**, **3a** and model complexes  $[\text{Me}_2\text{C}_6\text{H}_2(\text{CH}_2\text{NRR}')\text{RhCl}_2]$  (**2d**:  $\text{R}=\text{R}'=\text{H}$ ; **2e**:  $\text{R}=\text{Me}$ ,  $\text{R}'=\text{H}$ ; **2f**:  $\text{R}=\text{R}'=\text{Me}$ ) were performed with the Gaussian 09 program package.<sup>[S3]</sup> Geometries of the ground state were calculated by using density functional theory (DFT) with B3PW91 functional in gas phase. In all geometry optimizations, the 6-311G(d) basis set was used for C, H, N, O and Cl atoms and the SDD basis set was used for the Rh atom. We confirmed that the optimized structure of **2a** reproduced the experimental values in the solid state (Tables S4).

In the case of model complexes **2d-f**,  $\text{H}_2\text{O}$  adducts **2d-f-H<sub>2</sub>O** with six-coordinated geometry were more stable than those of  $\text{H}_2\text{O}$  free complex **2d-f** by about 4.5-5.3 kcal/mol (Figures S20-22). In contrast,  $\text{H}_2\text{O}$  adduct **2a-H<sub>2</sub>O** was unfavorable than  $\text{H}_2\text{O}$  free complex **2a** by about 4.5 kcal/mol (Figure S19). LUMO level of **2a** was higher than those of other model complexes **2d-f** (Figure S23).

**Table S4.** Comparison of geometric data of **2a** between the optimized and X-ray structures.

|            | Optimized structure | XRD Analysis |
|------------|---------------------|--------------|
| Rh-C1      | 1.910               | 1.909(8)     |
| Rh-N1      | 2.107               | 2.076(4)     |
| Rh-N2      | 2.107               | 2.076(4)     |
| Rh-C11     | 2.347               | 2.3117(10)   |
| Rh-C12     | 2.347               | 2.3117(10)   |
| N1-Rh-N2   | 164.7               | 166.2(2)     |
| C11-Rh-C12 | 171.4               | 172.37(7)    |

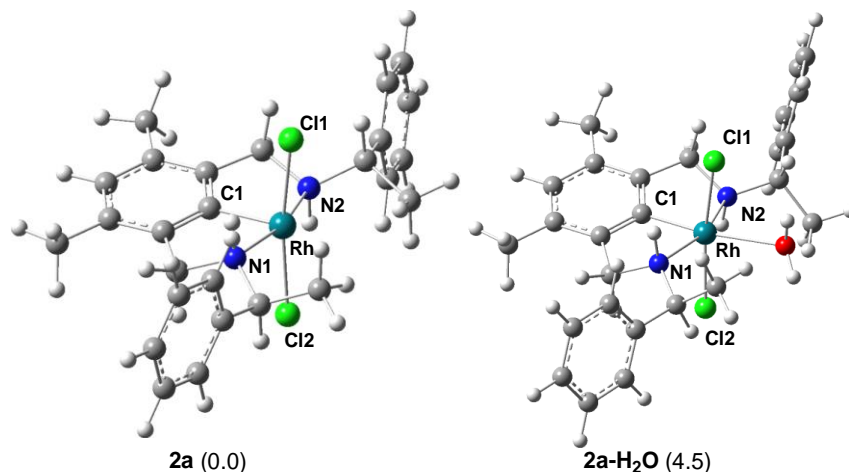

**Figure S19.** Optimized structure of **2a** and **2a-H<sub>2</sub>O** with the Gibbs energies  $\Delta G^0$  (kcal/mol) in parentheses.

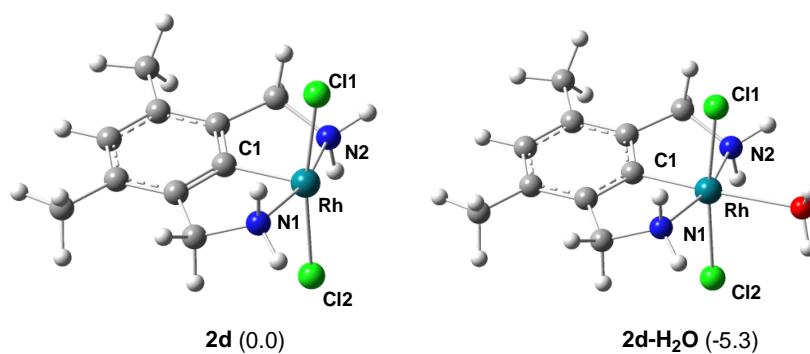

**Figure S20.** Optimized structure of **2d** and **2d-H<sub>2</sub>O** with the Gibbs energies  $\Delta G^0$  (kcal/mol) in parentheses.

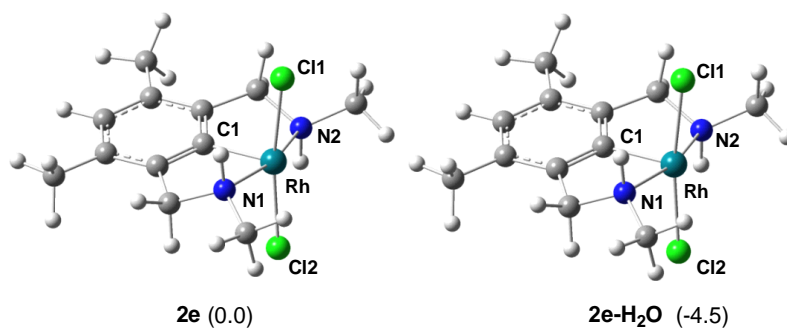

**Figure S21.** Optimized structure of **2e** and **2e-H<sub>2</sub>O** with the Gibbs energies  $\Delta G^0$  (kcal/mol) in parentheses.

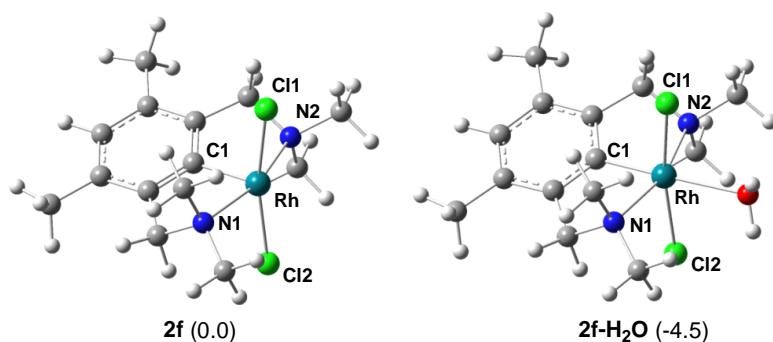

**Figure S22.** Optimized structure of **2e** and **2e-H<sub>2</sub>O** with the Gibbs energies  $\Delta G^0$  (kcal/mol) in parentheses.

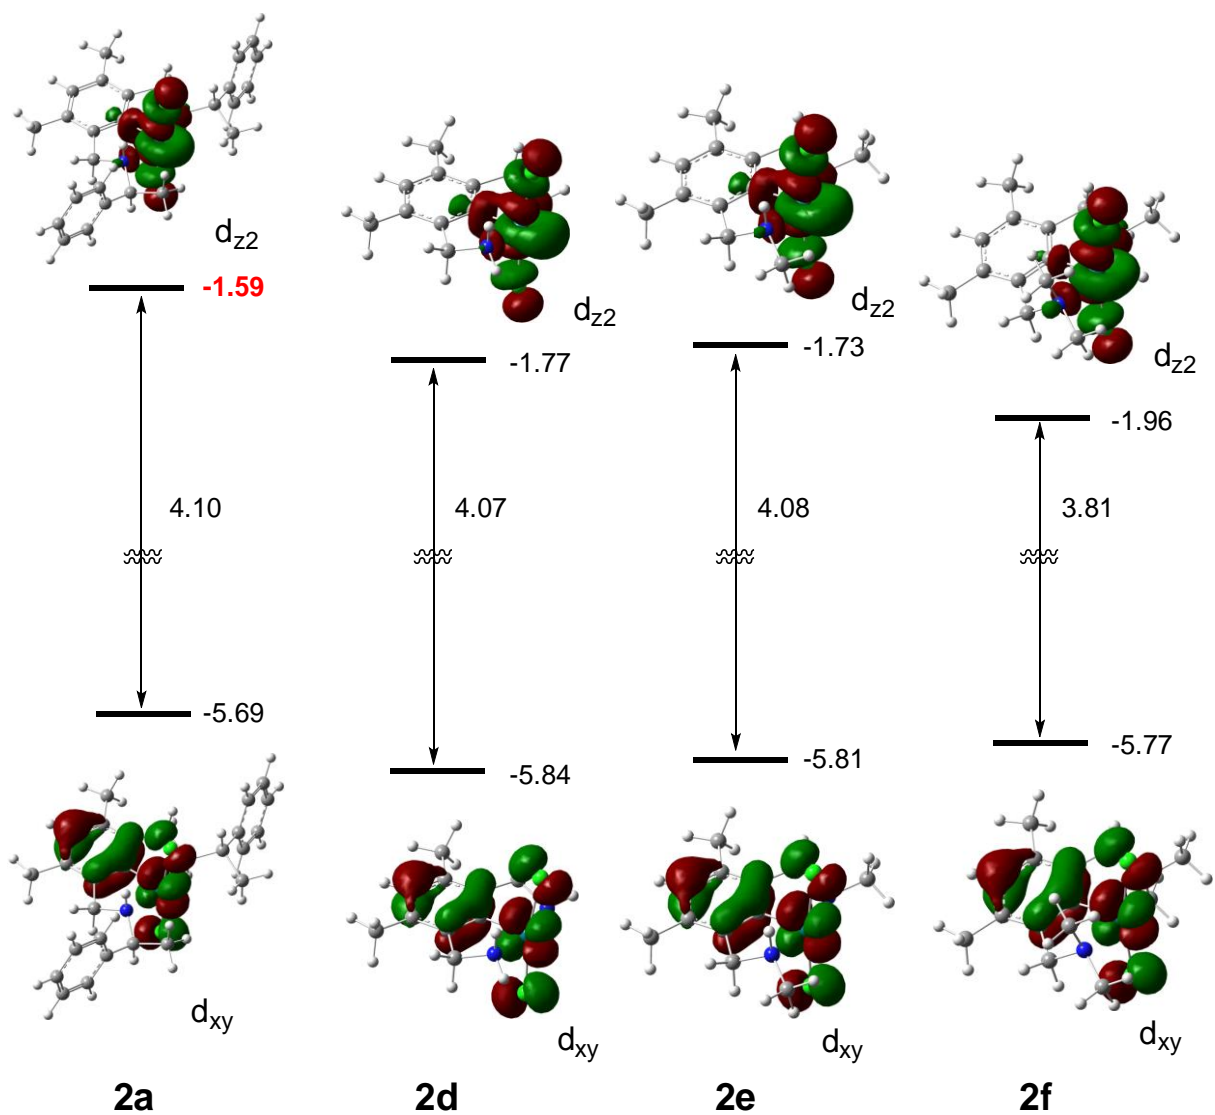

**Figure S23.** Molecular orbitals of HOMO and LUMO of **3a**, **3d**, **3e** and **3f**. In all complexes, HOMO and LUMO consisted of  $d_{xy}$  and  $d_{z^2}$  orbitals, respectively.



## Cartesian coordinates of optimized structures

**2a**

```

-----
Rh  4.9508  13.5032  4.3147
Cl  7.2780  13.3329  4.0731
C   4.9507  15.4077  4.3146
N   5.2441  13.7844  6.3903
C   4.8788  16.0556  5.5362
C   4.7338  15.1522  6.7292
H   5.2434  15.5440  7.6153
H   3.6730  15.0338  6.9730
C   4.7580  12.7185  7.3099
H   3.6674  12.7413  7.2257
C   4.8900  17.4493  5.5296
C   4.9506  18.1337  4.3146
H   4.9506  19.2193  4.3146
H   4.8427  18.0080  6.4615
C   5.2589  11.3699  6.8147
H   4.8703  11.1473  5.8169
H   4.9199  10.5734  7.4820
H   6.3518  11.3351  6.7709
H   6.2646  13.8059  6.4310
N   4.6574  13.7843  2.2390
C   5.0226  16.0555  3.0930
C   5.1676  15.1522  1.9001
H   4.6580  15.5439  1.0139
H   6.2285  15.0338  1.6562
C   5.1435  12.7184  1.3195
H   6.2342  12.7415  1.4035
C   5.0113  17.4493  3.0995
H   5.0586  18.0079  2.1677
C   4.6430  11.3698  1.8150
H   5.0318  11.1474  2.8128
H   4.9821  10.5733  1.1478
H   3.5501  11.3348  1.8589
H   3.6369  13.8057  2.1984
Cl  2.6236  13.3327  4.5562
C   5.1716  12.9757  8.7568
H   4.7609  13.9084  9.1502
H   4.8081  12.1681  9.3975
H   6.2621  13.0105  8.8580
C   4.7297  12.9753  -0.1274
H   5.1401  13.9080  -0.5210
H   5.0932  12.1676  -0.7680
H   3.6391  13.0099  -0.2284

```

**2a-H<sub>2</sub>O**

```

-----
Rh  4.9321  13.2328  4.3198
Cl  7.2720  13.0991  3.9183
C   4.9060  15.1603  4.3313
C   5.1412  13.0858  8.8664
N   5.3677  13.5989  6.4057
C   4.8356  15.8209  5.5456
C   6.3253  13.5814  9.4209
H   7.2353  13.6153  8.8265
C   4.0261  13.5108  10.9765
H   3.1230  13.4794  11.5788
C   6.3585  14.0418  10.7316

```

```

H   7.2863  14.4270  11.1444
C   3.9948  13.0593  9.6600
H   3.0650  12.6828  9.2413
C   5.2080  14.0053  11.5153
H   5.2351  14.3613  12.5407
C   4.7322  14.9174  6.7358
H   5.1884  15.3347  7.6375
H   3.6825  14.7061  6.9648
C   5.0929  12.5574  7.4414
H   4.0723  12.2212  7.2375
C   4.8278  17.2205  5.5547
C   4.8907  17.8814  4.3235
H   4.8836  18.9693  4.3204
C   4.7407  17.9992  6.8394
H   4.7678  19.0750  6.6527
H   5.5698  17.7627  7.5157
H   3.8146  17.7828  7.3831
C   6.0612  11.3913  7.2816
H   6.0360  10.9945  6.2689
H   5.8030  10.5935  7.9813
H   7.0923  11.6916  7.4864
H   6.3759  13.7461  6.3461
C   4.7520  13.0311  -0.1773
N   4.4605  13.5911  2.2665
C   4.9722  15.8149  3.1115
C   3.6313  13.5728  -0.8147
H   2.6847  13.6456  -0.2850
C   6.0262  13.3965  -2.2085
H   6.9663  13.3230  -2.7473
C   3.7073  14.0257  -2.1264
H   2.8266  14.4455  -2.6037
C   5.9475  12.9525  -0.8913
H   6.8295  12.5398  -0.4082
C   4.9061  13.9365  -2.8294
H   4.9643  14.2861  -3.8558
C   5.0922  14.9060  1.9243
H   4.6393  15.3152  1.0173
H   6.1447  14.7013  1.7031
C   4.6858  12.5130  1.2499
H   5.6601  12.0851  1.4987
C   4.9634  17.2143  3.0958
C   5.0420  17.9878  1.8074
H   5.0016  19.0641  1.9889
H   4.2164  17.7376  1.1319
H   5.9710  17.7800  1.2653
C   3.6073  11.4455  1.3965
H   3.5751  11.0661  2.4151
H   3.8168  10.6164  0.7164
H   2.6189  11.8399  1.1421
H   3.4549  13.7441  2.3511
Cl  2.6292  13.0546  4.7714
O   5.1315  10.9077  4.0558
H   6.0929  10.8093  4.0837
H   4.7310  10.3365  4.7171

```

**2d**

```

-----
Rh  4.9742  13.2483  4.3193

```

|    |        |         |        |   |        |         |        |
|----|--------|---------|--------|---|--------|---------|--------|
| Cl | 7.2765 | 13.0975 | 3.9304 | O | 4.9515 | 10.9305 | 4.1109 |
| C  | 4.9304 | 15.1606 | 4.3211 | H | 5.7878 | 10.5653 | 4.4169 |
| N  | 5.3455 | 13.5391 | 6.3568 | H | 4.2257 | 10.5688 | 4.6302 |
| C  | 4.9075 | 15.8061 | 5.5471 |   |        |         |        |
| C  | 4.8488 | 14.8997 | 6.7454 |   |        |         |        |
| H  | 5.4162 | 15.2754 | 7.6031 |   |        |         |        |
| H  | 3.8093 | 14.7705 | 7.0616 |   |        |         |        |
| H  | 4.9337 | 12.8331 | 6.9588 |   |        |         |        |
| C  | 4.8757 | 17.2051 | 5.5552 |   |        |         |        |
| C  | 4.8649 | 17.8686 | 4.3237 |   |        |         |        |
| H  | 4.8387 | 18.9558 | 4.3248 |   |        |         |        |
| C  | 4.8411 | 17.9785 | 6.8450 |   |        |         |        |
| H  | 4.8359 | 19.0548 | 6.6616 |   |        |         |        |
| H  | 5.7113 | 17.7579 | 7.4734 |   |        |         |        |
| H  | 3.9496 | 17.7418 | 7.4361 |   |        |         |        |
| H  | 6.3579 | 13.4849 | 6.4513 |   |        |         |        |
| N  | 4.5899 | 13.5260 | 2.2819 |   |        |         |        |
| C  | 4.9225 | 15.8089 | 3.0963 |   |        |         |        |
| C  | 5.0255 | 14.9082 | 1.8968 |   |        |         |        |
| H  | 4.4445 | 15.2593 | 1.0377 |   |        |         |        |
| H  | 6.0709 | 14.8264 | 1.5843 |   |        |         |        |
| H  | 5.0328 | 12.8403 | 1.6783 |   |        |         |        |
| C  | 4.8862 | 17.2078 | 3.0909 |   |        |         |        |
| C  | 4.8828 | 17.9845 | 1.8026 |   |        |         |        |
| H  | 4.8388 | 19.0595 | 1.9883 |   |        |         |        |
| H  | 4.0226 | 17.7255 | 1.1752 |   |        |         |        |
| H  | 5.7833 | 17.7902 | 1.2097 |   |        |         |        |
| H  | 3.5809 | 13.4269 | 2.1875 |   |        |         |        |
| Cl | 2.6814 | 12.9916 | 4.7080 |   |        |         |        |

---

### 2d-H<sub>2</sub>O

|    |        |         |        |
|----|--------|---------|--------|
| Rh | 4.9548 | 13.2212 | 4.3144 |
| Cl | 7.2867 | 13.1024 | 3.9506 |
| C  | 4.9234 | 15.1446 | 4.3270 |
| N  | 5.3363 | 13.5400 | 6.3568 |
| C  | 4.9003 | 15.8055 | 5.5465 |
| C  | 4.8339 | 14.8998 | 6.7449 |
| H  | 5.3947 | 15.2727 | 7.6089 |
| H  | 3.7924 | 14.7660 | 7.0539 |
| H  | 4.9492 | 12.8405 | 6.9819 |
| C  | 4.8759 | 17.2041 | 5.5570 |
| C  | 4.8719 | 17.8666 | 4.3249 |
| H  | 4.8518 | 18.9543 | 4.3239 |
| C  | 4.8424 | 17.9801 | 6.8456 |
| H  | 4.8434 | 19.0565 | 6.6612 |
| H  | 5.7097 | 17.7560 | 7.4771 |
| H  | 3.9482 | 17.7495 | 7.4356 |
| H  | 6.3514 | 13.5041 | 6.4299 |
| N  | 4.5736 | 13.5230 | 2.2878 |
| C  | 4.9207 | 15.8035 | 3.1047 |
| C  | 5.0188 | 14.9021 | 1.9032 |
| H  | 4.4415 | 15.2561 | 1.0422 |
| H  | 6.0638 | 14.8130 | 1.5903 |
| H  | 5.0105 | 12.8250 | 1.6941 |
| C  | 4.8922 | 17.2021 | 3.0936 |
| C  | 4.8955 | 17.9780 | 1.8044 |
| H  | 4.8575 | 19.0538 | 1.9884 |
| H  | 4.0349 | 17.7236 | 1.1753 |
| H  | 5.7955 | 17.7779 | 1.2124 |
| H  | 3.5645 | 13.4304 | 2.1945 |
| Cl | 2.6388 | 13.0112 | 4.7355 |

---

### 2e

|    |        |         |        |
|----|--------|---------|--------|
| Rh | 4.9733 | 13.2673 | 4.3193 |
| Cl | 7.2815 | 13.1339 | 3.9386 |
| C  | 4.9295 | 15.1785 | 4.3212 |
| H  | 5.3019 | 12.7906 | 8.3384 |
| N  | 5.3968 | 13.5674 | 6.3599 |
| C  | 4.8979 | 15.8202 | 5.5479 |
| C  | 4.8357 | 14.9018 | 6.7377 |
| H  | 5.3629 | 15.2874 | 7.6187 |
| H  | 3.7923 | 14.7295 | 7.0222 |
| C  | 5.0347 | 12.5098 | 7.3128 |
| H  | 3.9620 | 12.3287 | 7.2506 |
| C  | 4.8661 | 17.2194 | 5.5563 |
| C  | 4.8645 | 17.8823 | 4.3238 |
| H  | 4.8387 | 18.9695 | 4.3249 |
| C  | 4.8214 | 17.9940 | 6.8450 |
| H  | 4.8177 | 19.0702 | 6.6605 |
| H  | 5.6863 | 17.7737 | 7.4805 |
| H  | 3.9251 | 17.7578 | 7.4289 |
| H  | 5.5651 | 11.5951 | 7.0447 |
| H  | 6.4128 | 13.6479 | 6.3267 |
| H  | 4.6715 | 12.7829 | 0.2988 |
| N  | 4.5379 | 13.5514 | 2.2784 |
| C  | 4.9303 | 15.8233 | 3.0959 |
| C  | 5.0376 | 14.9111 | 1.9046 |
| H  | 4.4957 | 15.2736 | 1.0228 |
| H  | 6.0888 | 14.7876 | 1.6234 |
| C  | 4.9512 | 12.5140 | 1.3243 |
| H  | 6.0314 | 12.3851 | 1.3873 |
| C  | 4.8946 | 17.2224 | 3.0901 |
| C  | 4.9020 | 18.0006 | 1.8027 |
| H  | 4.8587 | 19.0756 | 1.9892 |
| H  | 4.0460 | 17.7437 | 1.1688 |
| H  | 5.8063 | 17.8050 | 1.2163 |
| H  | 4.4656 | 11.5742 | 1.5906 |
| H  | 3.5192 | 13.5847 | 2.3099 |
| Cl | 2.6739 | 13.0291 | 4.7011 |

---

### 2e-H<sub>2</sub>O

|    |        |         |        |
|----|--------|---------|--------|
| Rh | 4.9586 | 13.2341 | 4.3039 |
| Cl | 7.2939 | 13.1181 | 3.9493 |
| C  | 4.9274 | 15.1579 | 4.3191 |
| H  | 5.3022 | 12.8440 | 8.3574 |
| N  | 5.3852 | 13.5614 | 6.3555 |
| C  | 4.8942 | 15.8136 | 5.5404 |
| C  | 4.8243 | 14.8976 | 6.7301 |
| H  | 5.3495 | 15.2791 | 7.6149 |
| H  | 3.7796 | 14.7261 | 7.0119 |
| C  | 5.0467 | 12.5281 | 7.3388 |
| H  | 3.9773 | 12.3229 | 7.2830 |
| C  | 4.8668 | 17.2122 | 5.5559 |
| C  | 4.8692 | 17.8784 | 4.3255 |
| H  | 4.8472 | 18.9660 | 4.3278 |
| C  | 4.8222 | 17.9846 | 6.8464 |
| H  | 4.8234 | 19.0615 | 6.6648 |

|    |        |         |        |
|----|--------|---------|--------|
| H  | 5.6846 | 17.7597 | 7.4841 |
| H  | 3.9237 | 17.7512 | 7.4286 |
| H  | 5.6019 | 11.6174 | 7.1083 |
| H  | 6.3999 | 13.6506 | 6.3034 |
| H  | 4.6498 | 12.7960 | 0.2831 |
| N  | 4.5350 | 13.5492 | 2.2674 |
| C  | 4.9295 | 15.8193 | 3.0995 |
| C  | 5.0332 | 14.9133 | 1.9034 |
| H  | 4.4907 | 15.2785 | 1.0225 |
| H  | 6.0835 | 14.7903 | 1.6177 |
| C  | 4.9512 | 12.5243 | 1.3019 |
| H  | 6.0352 | 12.4200 | 1.3462 |
| C  | 4.8980 | 17.2179 | 3.0919 |
| C  | 4.9084 | 17.9986 | 1.8056 |
| H  | 4.8684 | 19.0737 | 1.9935 |
| H  | 4.0519 | 17.7456 | 1.1704 |
| H  | 5.8121 | 17.8013 | 1.2184 |
| H  | 4.4974 | 11.5735 | 1.5774 |
| H  | 3.5166 | 13.5815 | 2.2963 |
| Cl | 2.6381 | 13.0418 | 4.7187 |
| O  | 4.9361 | 10.9344 | 4.1536 |
| H  | 5.7736 | 10.5737 | 4.4616 |
| H  | 4.2164 | 10.6048 | 4.7020 |

**2f**

|    |        |         |        |
|----|--------|---------|--------|
| Rh | 4.9746 | 13.2377 | 4.3195 |
| Cl | 7.2019 | 13.0219 | 3.5897 |
| C  | 4.9290 | 15.1492 | 4.3208 |
| H  | 5.3568 | 12.7829 | 8.3504 |
| N  | 5.5469 | 13.5783 | 6.3918 |
| C  | 4.8933 | 15.7896 | 5.5483 |
| C  | 4.8331 | 14.8601 | 6.7285 |
| H  | 5.2677 | 15.2813 | 7.6436 |
| H  | 3.7919 | 14.5975 | 6.9337 |
| C  | 5.1308 | 12.5041 | 7.3129 |
| H  | 4.0652 | 12.3161 | 7.2033 |
| C  | 4.8611 | 17.1891 | 5.5566 |
| C  | 4.8652 | 17.8517 | 4.3234 |
| H  | 4.8399 | 18.9390 | 4.3245 |
| C  | 4.8086 | 17.9660 | 6.8441 |
| H  | 4.8204 | 19.0418 | 6.6576 |
| H  | 5.6618 | 17.7361 | 7.4916 |
| H  | 3.9018 | 17.7414 | 7.4160 |
| H  | 5.6820 | 11.5951 | 7.0668 |
| H  | 4.6143 | 12.7728 | 0.2865 |
| N  | 4.3881 | 13.5547 | 2.2466 |
| C  | 4.9350 | 15.7929 | 3.0948 |
| C  | 5.0408 | 14.8695 | 1.9132 |
| H  | 4.5878 | 15.2715 | 0.9983 |
| H  | 6.0935 | 14.6575 | 1.7084 |
| C  | 4.8547 | 12.5035 | 1.3232 |
| H  | 5.9284 | 12.3674 | 1.4312 |
| C  | 4.9006 | 17.1924 | 3.0891 |
| C  | 4.9177 | 17.9731 | 1.8030 |
| H  | 4.8567 | 19.0470 | 1.9914 |
| H  | 4.0762 | 17.7058 | 1.1545 |
| H  | 5.8340 | 17.7912 | 1.2311 |
| H  | 4.3485 | 11.5684 | 1.5683 |
| Cl | 2.7592 | 12.9185 | 5.0504 |
| C  | 6.9983 | 13.8026 | 6.5680 |
| H  | 7.1984 | 14.0535 | 7.6176 |

|   |        |         |        |
|---|--------|---------|--------|
| H | 7.5496 | 12.9069 | 6.2930 |
| H | 7.3272 | 14.6162 | 5.9250 |
| C | 2.9278 | 13.7111 | 2.0706 |
| H | 2.7162 | 13.9570 | 1.0220 |
| H | 2.4190 | 12.7894 | 2.3415 |
| H | 2.5613 | 14.5056 | 2.7169 |

**2f-H<sub>2</sub>O**

|    |        |         |        |
|----|--------|---------|--------|
| Rh | 4.9629 | 13.2081 | 4.2976 |
| Cl | 7.2178 | 13.0334 | 3.5744 |
| C  | 4.9321 | 15.1327 | 4.3151 |
| H  | 5.3274 | 12.8319 | 8.3672 |
| N  | 5.5376 | 13.5731 | 6.3891 |
| C  | 4.8978 | 15.7869 | 5.5376 |
| C  | 4.8318 | 14.8618 | 6.7196 |
| H  | 5.2695 | 15.2796 | 7.6356 |
| H  | 3.7894 | 14.6057 | 6.9275 |
| C  | 5.1206 | 12.5238 | 7.3337 |
| H  | 4.0568 | 12.3262 | 7.2167 |
| C  | 4.8670 | 17.1858 | 5.5530 |
| C  | 4.8690 | 17.8521 | 4.3223 |
| H  | 4.8451 | 18.9398 | 4.3251 |
| C  | 4.8175 | 17.9603 | 6.8425 |
| H  | 4.8348 | 19.0368 | 6.6589 |
| H  | 5.6690 | 17.7252 | 7.4909 |
| H  | 3.9093 | 17.7395 | 7.4141 |
| H  | 5.6876 | 11.6134 | 7.1289 |
| H  | 4.5988 | 12.7893 | 0.2683 |
| N  | 4.3924 | 13.5551 | 2.2339 |
| C  | 4.9329 | 15.7938 | 3.0951 |
| C  | 5.0332 | 14.8785 | 1.9070 |
| H  | 4.5709 | 15.2805 | 0.9964 |
| H  | 6.0851 | 14.6733 | 1.6904 |
| C  | 4.8651 | 12.5182 | 1.2983 |
| H  | 5.9441 | 12.4115 | 1.3849 |
| C  | 4.8995 | 17.1927 | 3.0879 |
| C  | 4.9118 | 17.9759 | 1.8028 |
| H  | 4.8516 | 19.0498 | 1.9928 |
| H  | 4.0678 | 17.7100 | 1.1566 |
| H  | 5.8256 | 17.7951 | 1.2264 |
| H  | 4.3937 | 11.5702 | 1.5549 |
| Cl | 2.7234 | 12.9401 | 5.0724 |
| O  | 4.9098 | 10.9098 | 4.1530 |
| H  | 5.7679 | 10.5310 | 4.3686 |
| H  | 4.2460 | 10.5981 | 4.7781 |
| C  | 6.9890 | 13.7958 | 6.5565 |
| H  | 7.1973 | 14.0568 | 7.6026 |
| H  | 7.5395 | 12.8979 | 6.2859 |
| H  | 7.3149 | 14.6017 | 5.9030 |
| C  | 2.9308 | 13.6980 | 2.0681 |
| H  | 2.7082 | 13.9476 | 1.0224 |
| H  | 2.4347 | 12.7685 | 2.3365 |
| H  | 2.5611 | 14.4852 | 2.7214 |

**3a**

|   |           |           |           |
|---|-----------|-----------|-----------|
| C | -0.000010 | -1.374706 | -0.000152 |
| C | 1.210111  | -2.013725 | -0.212373 |
| C | 1.215611  | -3.414155 | -0.210048 |
| C | -0.000022 | -4.075321 | -0.000439 |

|    |           |           |           |   |           |           |           |
|----|-----------|-----------|-----------|---|-----------|-----------|-----------|
| C  | -1.215649 | -3.414189 | 0.209309  | H | -3.241429 | -3.951931 | -0.324216 |
| C  | -1.210136 | -2.013758 | 0.211931  | H | -2.930693 | -3.968064 | 1.408163  |
| C  | 2.485309  | -4.189676 | -0.432976 | H | 3.319563  | -1.484658 | -0.049055 |
| C  | -2.485356 | -4.189745 | 0.432065  | H | 2.534941  | -0.990121 | -1.548612 |
| C  | 2.382290  | -1.106305 | -0.469851 | H | -2.534969 | -0.990438 | 1.548381  |
| C  | -2.382310 | -1.106385 | 0.469596  | H | -3.319583 | -1.484645 | 0.048714  |
| C  | 2.542679  | 2.661926  | 0.097984  | H | 1.502734  | 2.894611  | -0.155815 |
| C  | 2.953447  | 1.312366  | -0.484897 | H | 3.170982  | 3.456074  | -0.311784 |
| C  | 4.429390  | 1.035301  | -0.261983 | H | 2.644543  | 2.674170  | 1.185708  |
| C  | 4.937938  | 0.838647  | 1.026230  | H | 2.751283  | 1.319938  | -1.559797 |
| C  | 6.294538  | 0.605974  | 1.220865  | H | 4.270489  | 0.858865  | 1.884003  |
| C  | 7.165158  | 0.572378  | 0.134509  | H | 6.673840  | 0.451385  | 2.226787  |
| C  | 6.669535  | 0.768625  | -1.149355 | H | 8.224834  | 0.392306  | 0.289625  |
| C  | 5.309567  | 0.994711  | -1.343125 | H | 7.340188  | 0.741747  | -2.003328 |
| C  | -2.542698 | 2.661971  | -0.097410 | H | 4.926547  | 1.143139  | -2.349996 |
| C  | -2.953451 | 1.312284  | 0.485186  | H | -2.644593 | 2.674456  | -1.185128 |
| C  | -4.429398 | 1.035259  | 0.262245  | H | -1.502746 | 2.894597  | 0.156412  |
| C  | -4.937979 | 0.838920  | -1.026003 | H | -3.170988 | 3.456029  | 0.312553  |
| C  | -6.294580 | 0.606265  | -1.220658 | H | -2.751264 | 1.319624  | 1.560083  |
| C  | -7.165167 | 0.572373  | -0.134285 | H | -4.270556 | 0.859370  | -1.883790 |
| C  | -6.669511 | 0.768307  | 1.149615  | H | -6.673908 | 0.451923  | -2.226607 |
| C  | -5.309543 | 0.994376  | 1.343402  | H | -8.224844 | 0.392316  | -0.289415 |
| C  | -0.585469 | 0.577762  | -2.965122 | H | -7.340138 | 0.741197  | 2.003601  |
| C  | -0.002544 | 0.697380  | -4.358985 | H | -4.926496 | 1.142556  | 2.350299  |
| C  | 0.585497  | 0.577092  | 2.965171  | H | 0.417432  | -0.270535 | -4.649847 |
| C  | 0.002690  | 0.696262  | 4.359119  | H | 0.804641  | 1.430912  | -4.389215 |
| N  | 2.090237  | 0.249329  | 0.081592  | H | -0.782521 | 0.961397  | -5.072645 |
| N  | -2.090251 | 0.249369  | -0.081551 | H | -0.414978 | -0.272470 | 4.650606  |
| O  | 0.296719  | 0.672227  | -2.025394 | H | -0.806058 | 1.428052  | 4.389290  |
| O  | -1.795712 | 0.389008  | -2.815317 | H | 0.782344  | 0.962225  | 5.072422  |
| O  | -0.296690 | 0.671920  | 2.025489  | H | -0.000026 | -5.163179 | -0.000553 |
| O  | 1.795691  | 0.388057  | 2.815289  | H | 2.305290  | -5.266048 | -0.390847 |
| Rh | -0.000002 | 0.535414  | 0.000038  | H | -2.202973 | 0.222984  | -1.109159 |
| H  | 3.241424  | -3.951962 | 0.323295  | H | 2.202940  | 0.222697  | 1.109197  |
| H  | 2.930591  | -3.967861 | -1.409069 |   |           |           |           |
| H  | -2.305331 | -5.266110 | 0.389799  |   |           |           |           |

---

## 6. References.

- [S1] M. Gerisch, J. R. Krumper, R. G. Bergman, T. D. Tilley *Organometallics* **2003**, *22*, 47.
- [S2] K. Aikawa, Y. Hioki, K. Mikami, *Org. Lett.* **2010**, *12*, 5716.
- [S3] (a) Gaussian 09, Revision D.01, M. J. Frisch, G. W. Trucks, H. B. Schlegel, G. E. Scuseria, M. A. Robb, J. R. Cheeseman, G. Scalmani, V. Barone, B. Mennucci, G. A. Petersson, H. Nakatsuji, M. Caricato, X. Li, H. P. Hratchian, A. F. Izmaylov, J. Bloino, G. Zheng, J. L. Sonnenberg, M. Hada, M. Ehara, K. Toyota, R. Fukuda, J. Hasegawa, M. Ishida, T. Nakajima, Y. Honda, O. Kitao, H. Nakai, T. Vreven, J. A. Montgomery, Jr., J. E. Peralta, F. Ogliaro, M. Bearpark, J. J. Heyd, E. Brothers, K. N. Kudin, V. N. Staroverov, T. Keith, R. Kobayashi, J. Normand, K. Raghavachari, A. Rendell, J. C. Burant, S. S. Iyengar, J. Tomasi, M. Cossi, N. Rega, J. M. Millam, M. Klene, J. E. Knox, J. B. Cross, V. Bakken, C. Adamo, J. Jaramillo, R. Gomperts, R. E. Stratmann, O. Yazyev, A. J. Austin, R. Cammi, C. Pomelli, J. W. Ochterski, R. L. Martin, K. Morokuma, V. G. Zakrzewski, G. A. Voth, P. Salvador, J. J. Dannenberg, S. Dapprich, A. D. Daniels, O. Farkas, J. B. Foresman, J. V. Ortiz, J. Cioslowski, and D. J. Fox, Gaussian, Inc., Wallingford CT, **2013**.

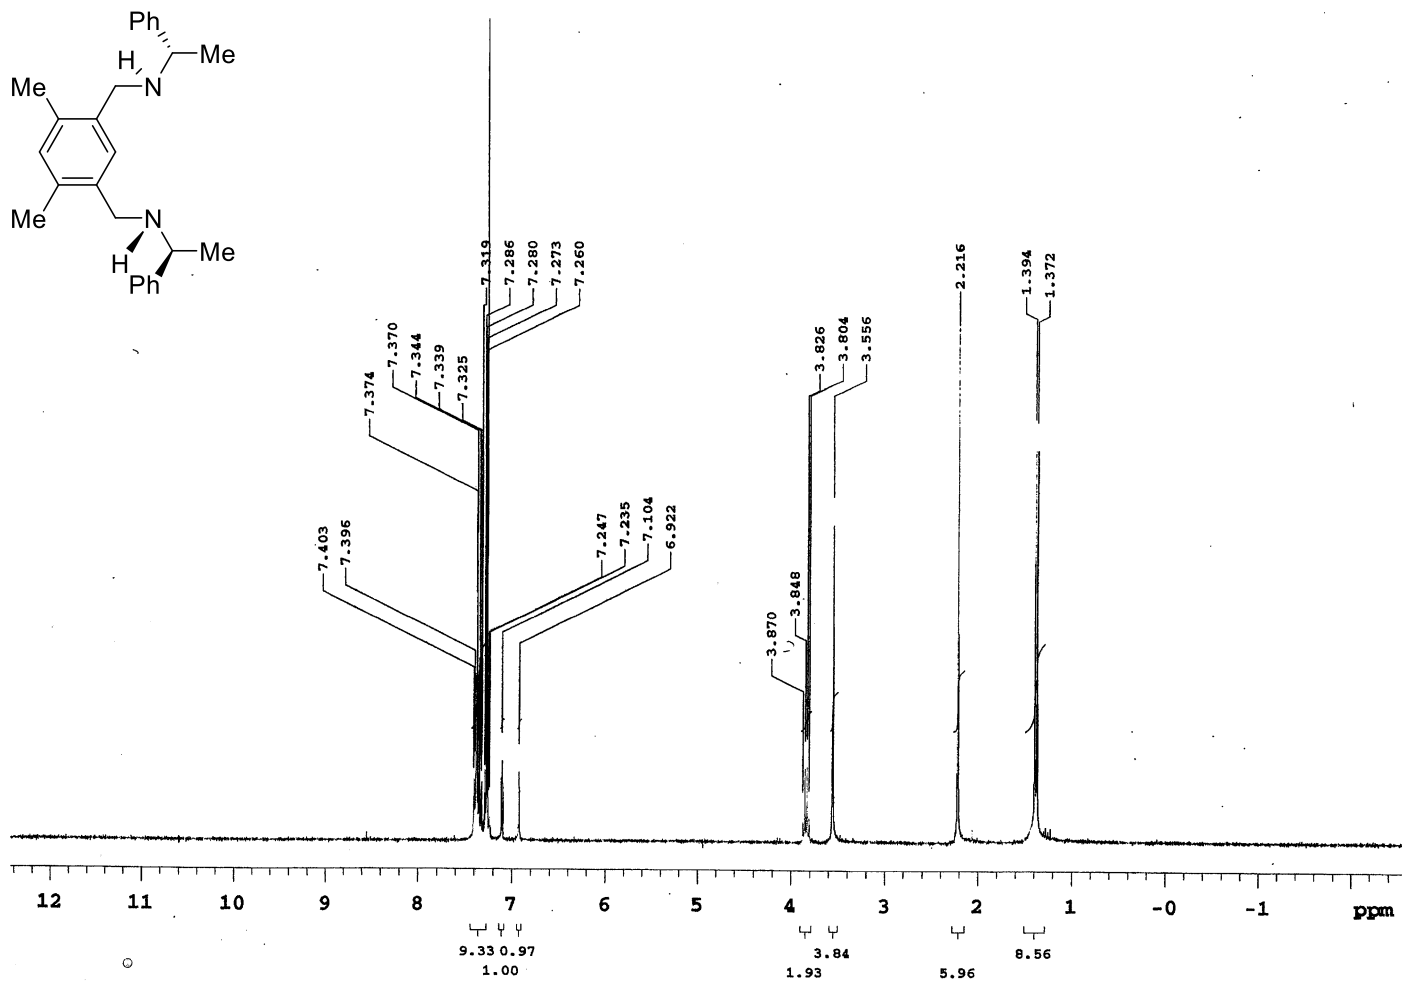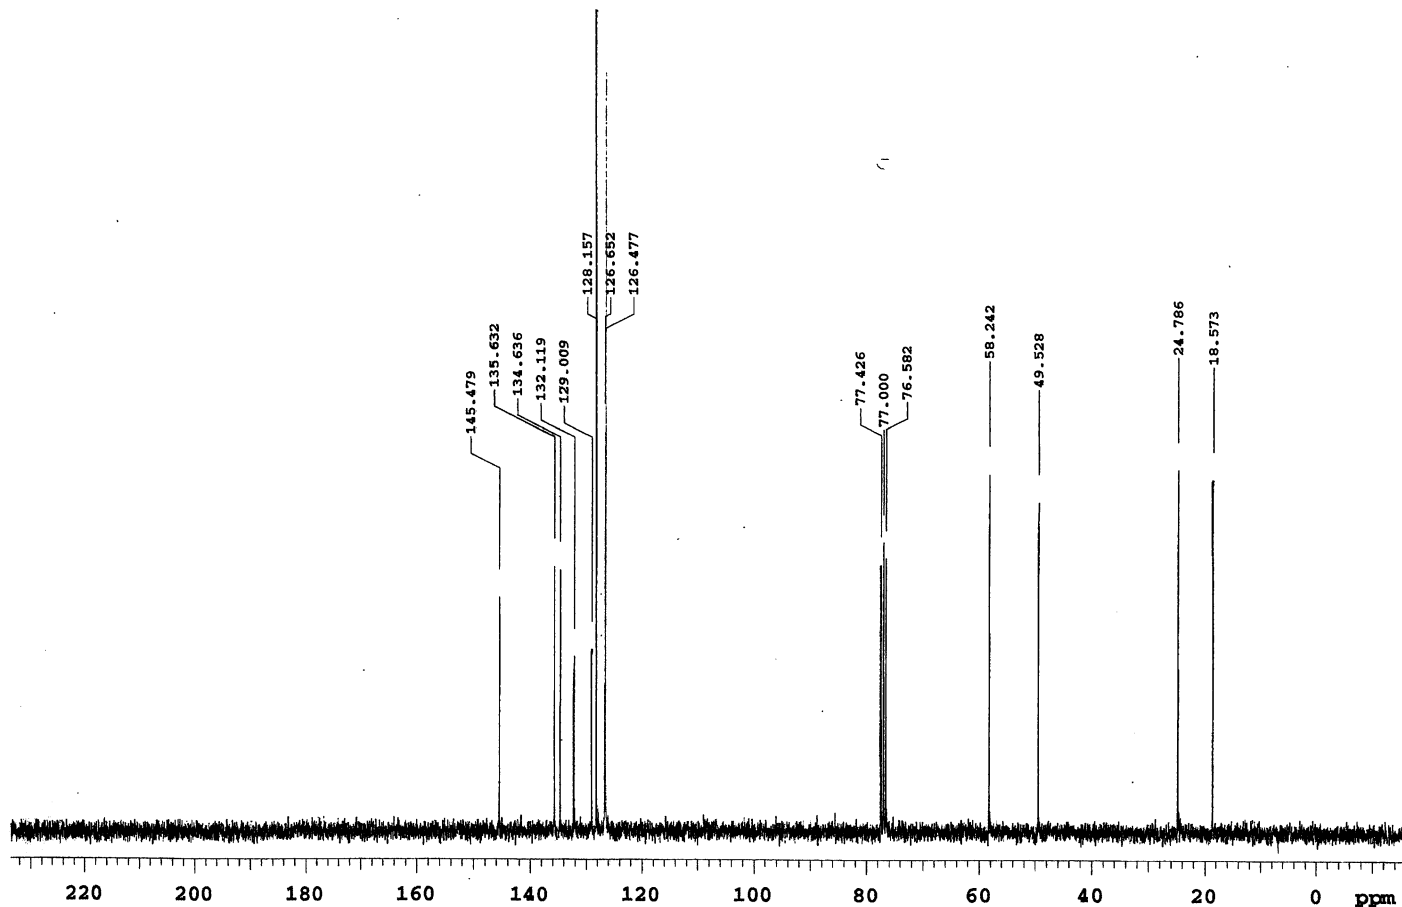

Fig S 24. <sup>1</sup>H and <sup>13</sup>C NMR spectra of 2a.

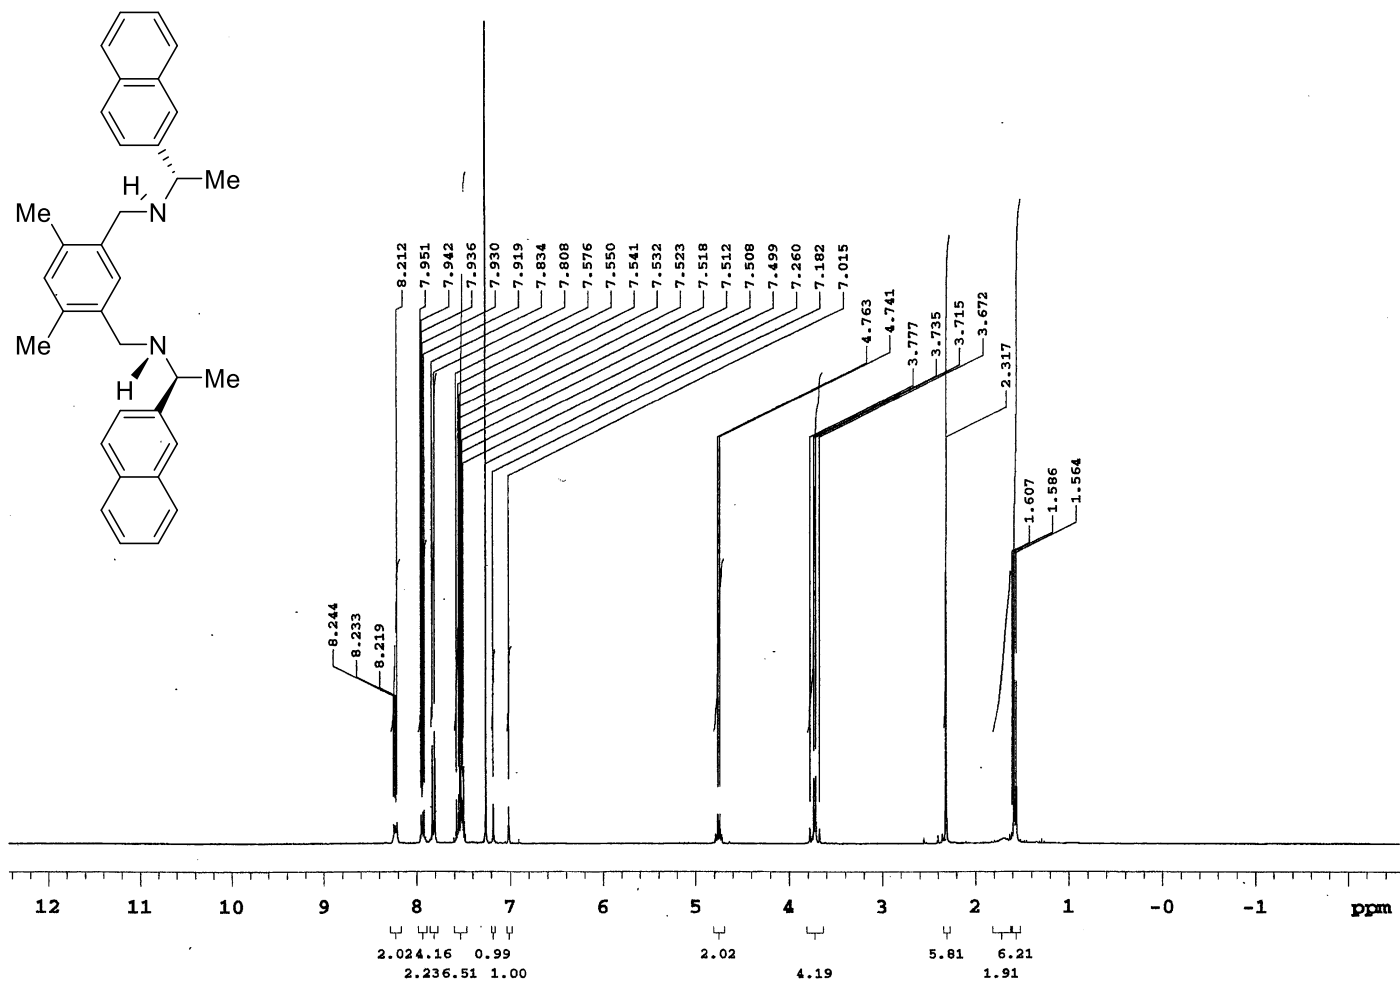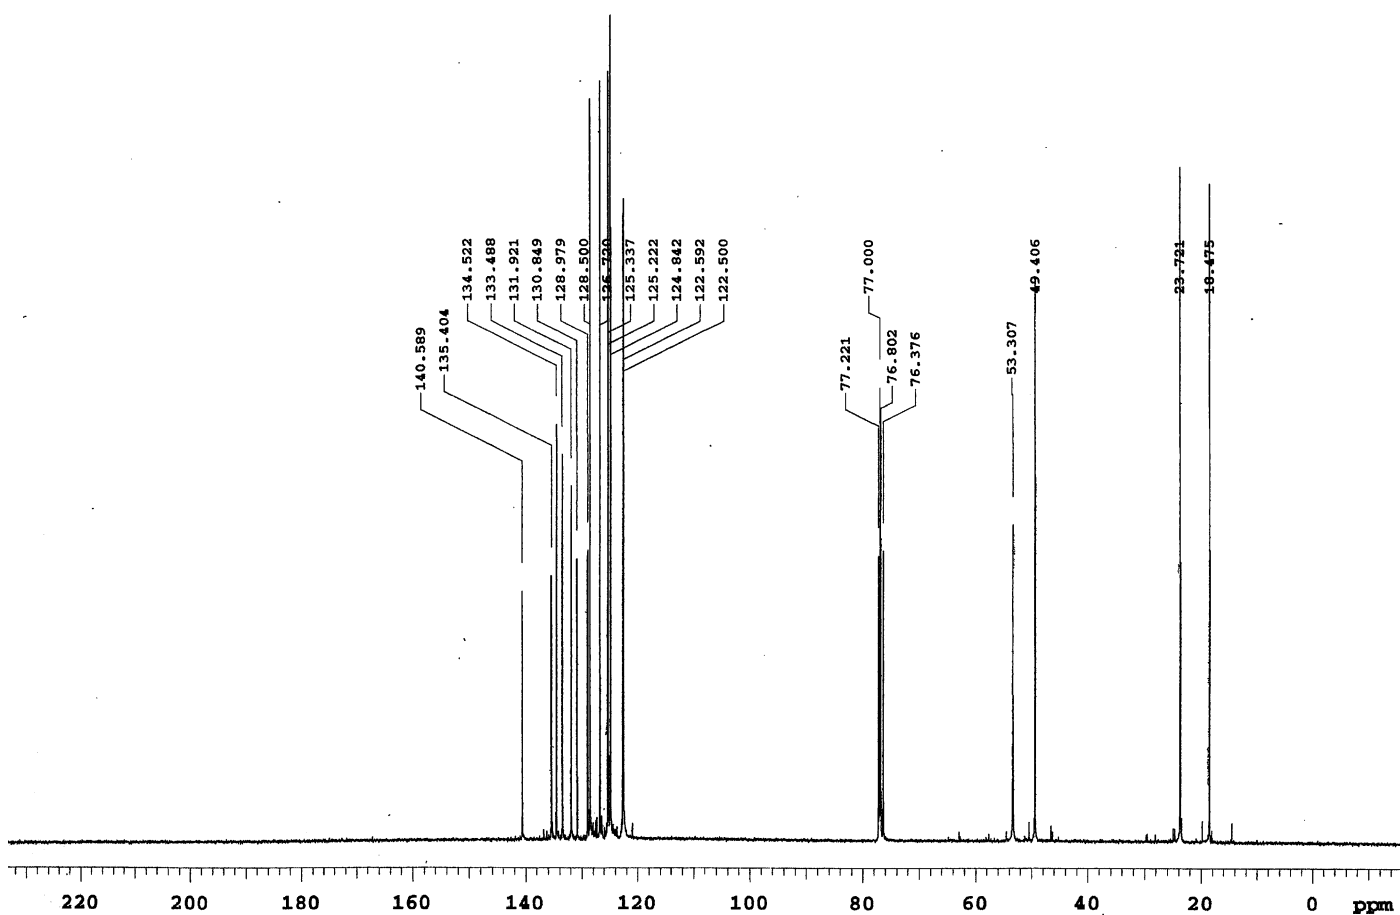

Fig S 25. <sup>1</sup>H and <sup>13</sup>C NMR spectra of **2b**.

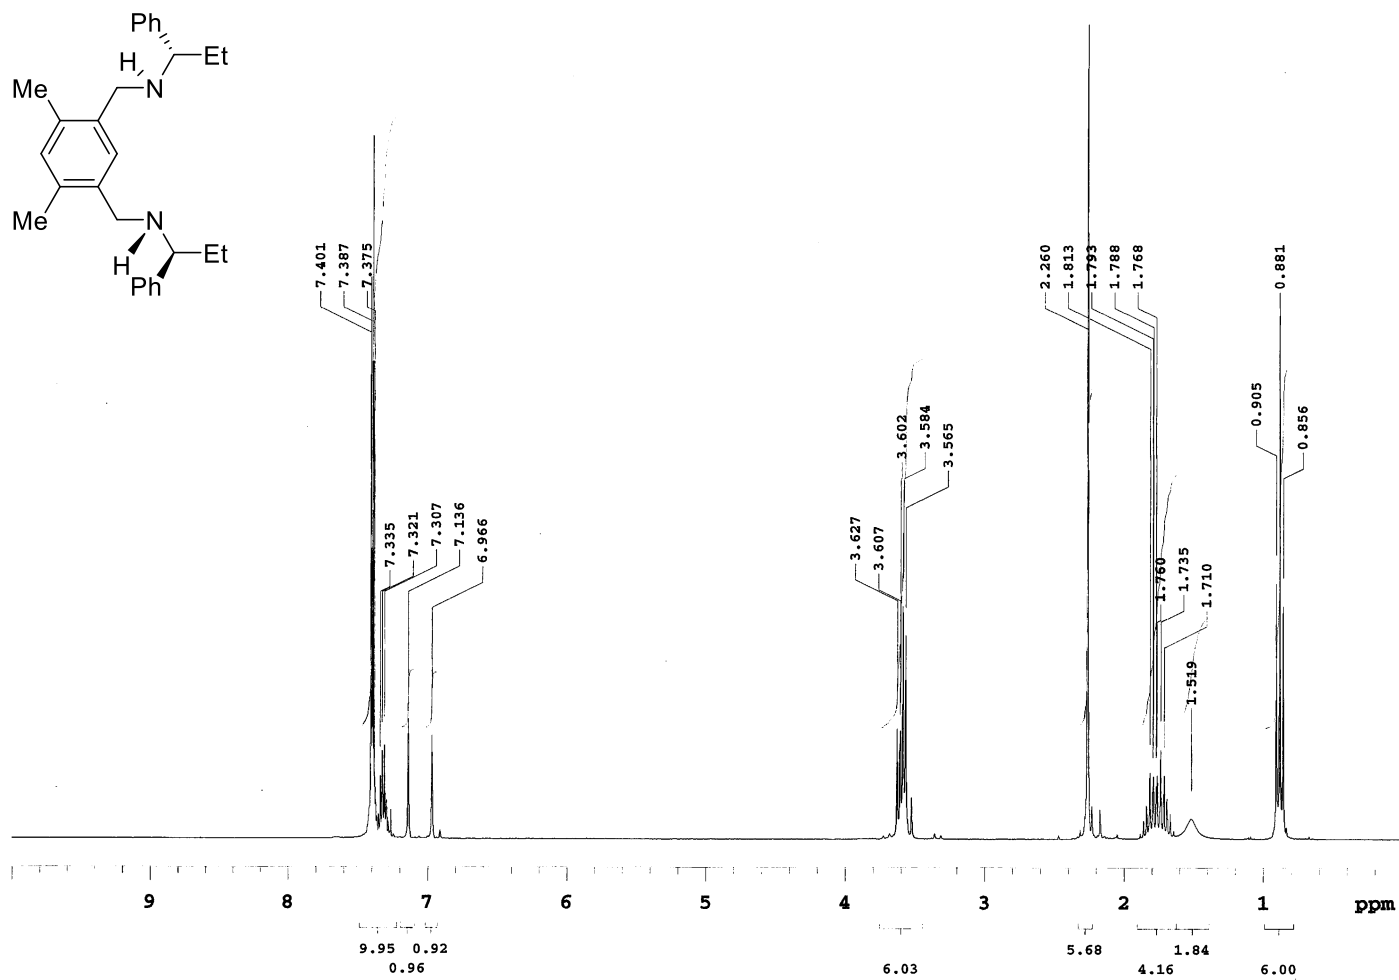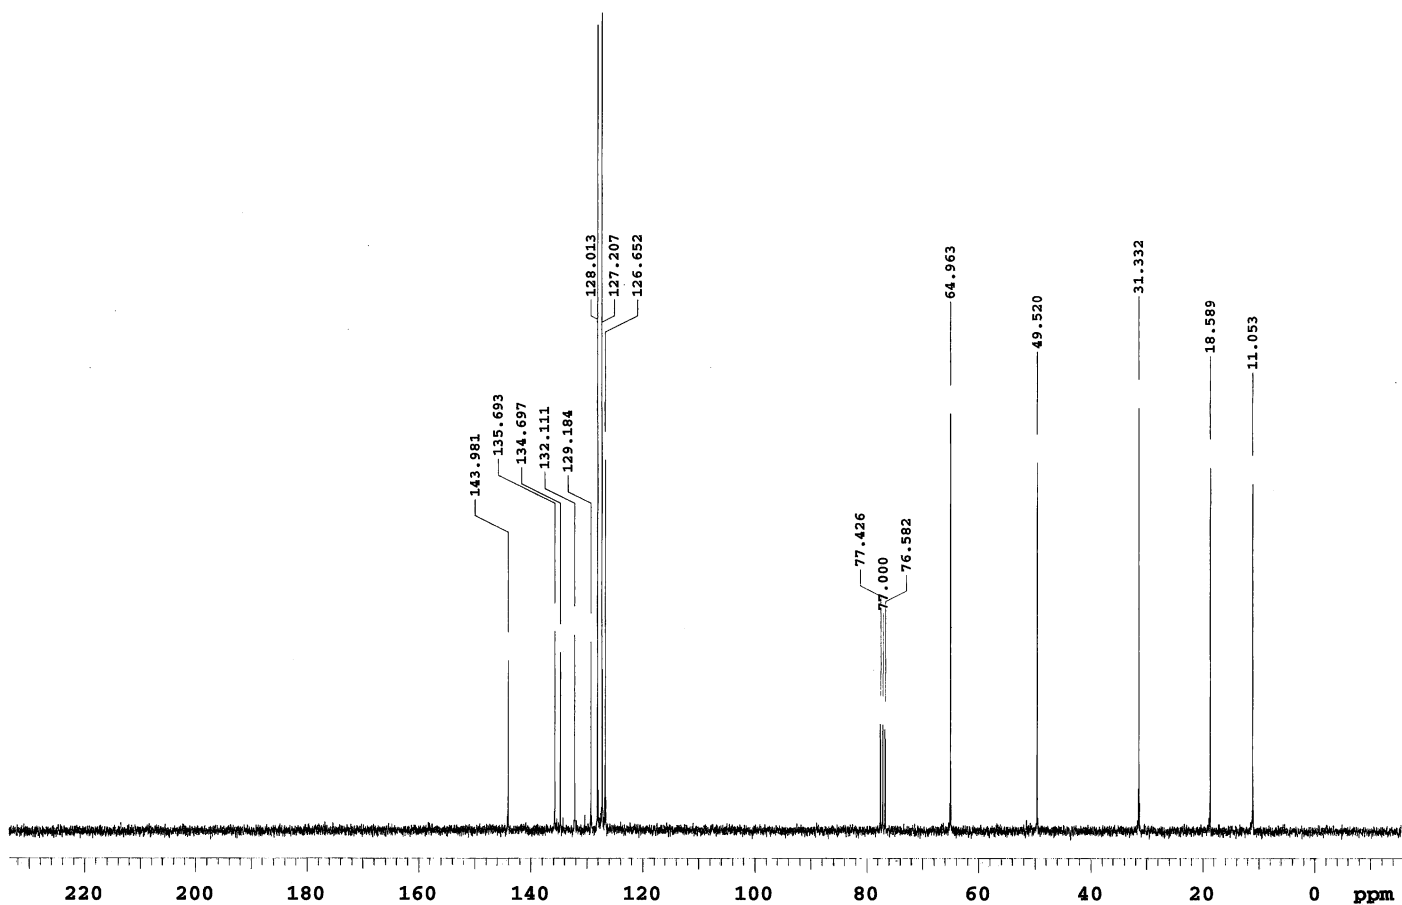

Fig S 26. <sup>1</sup>H and <sup>13</sup>C NMR spectra of **2c**.



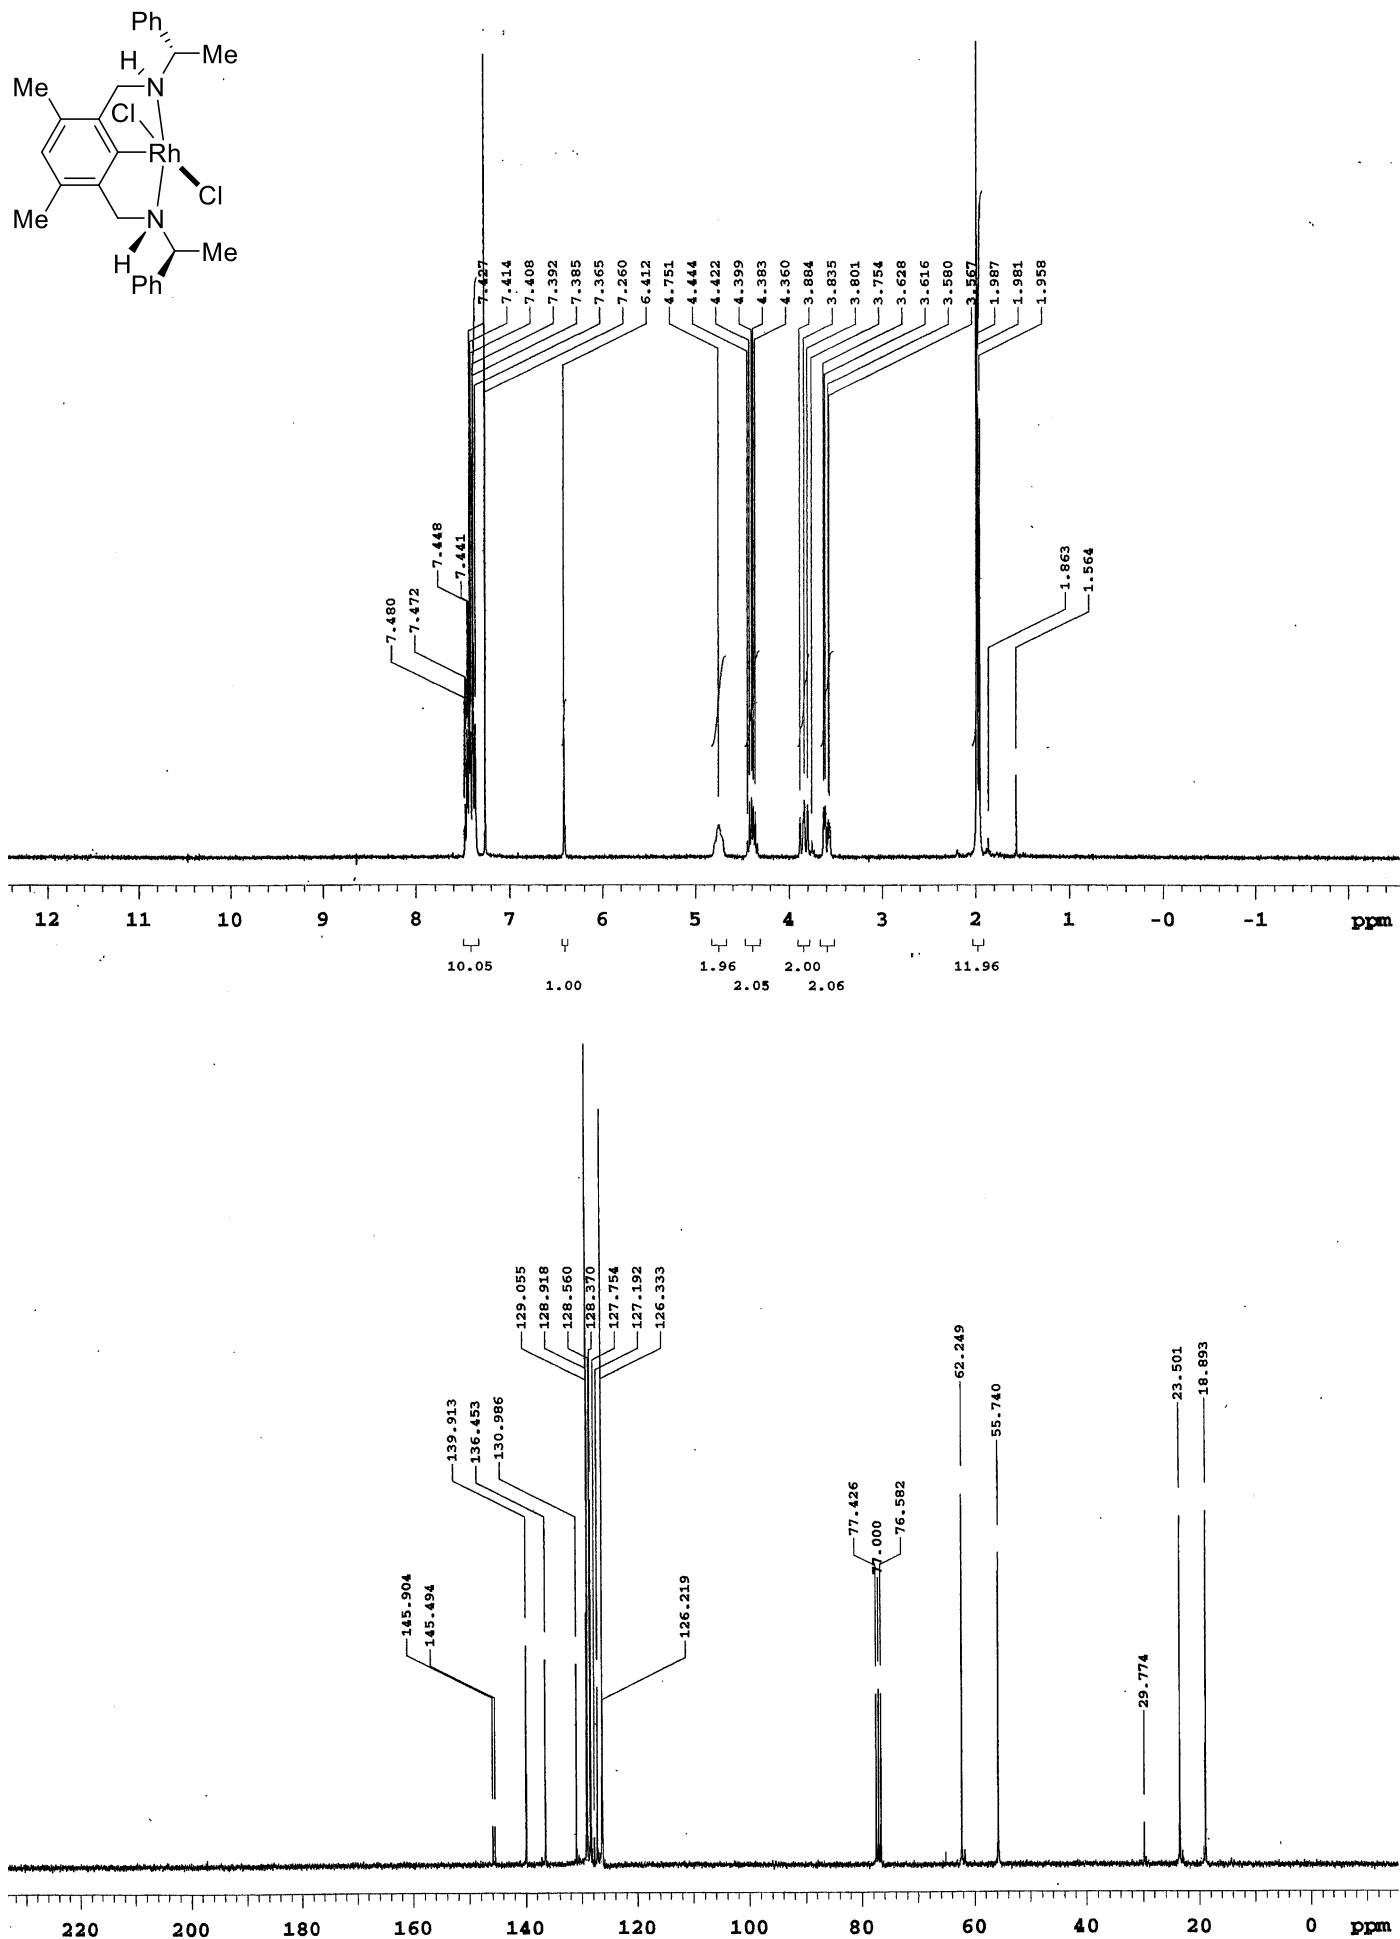

Fig S 27. <sup>1</sup>H and <sup>13</sup>C NMR spectra of **3a**.

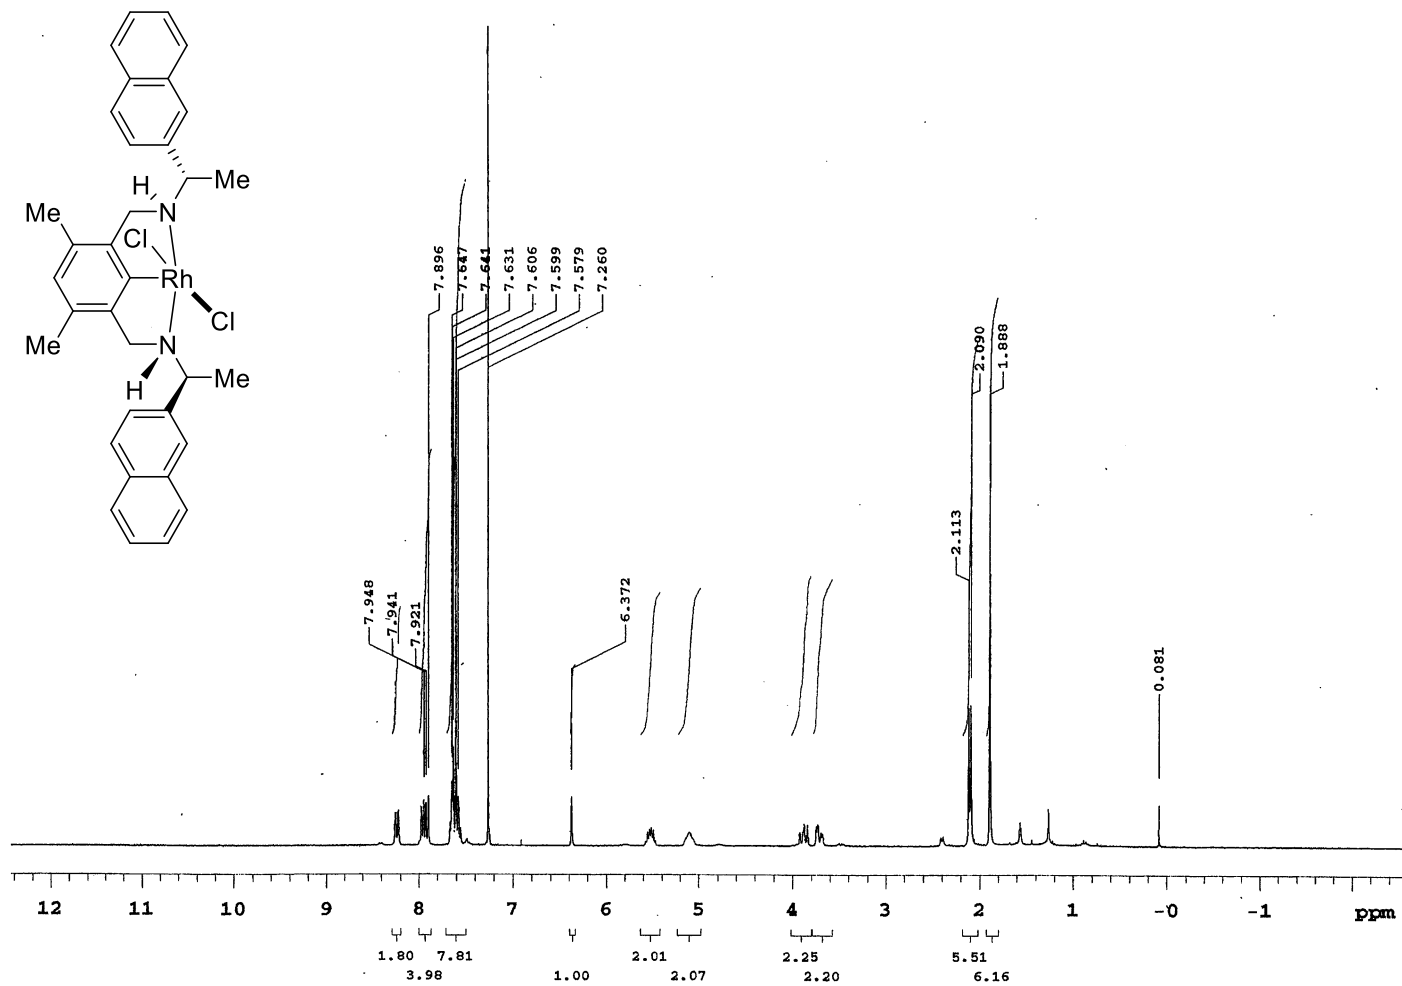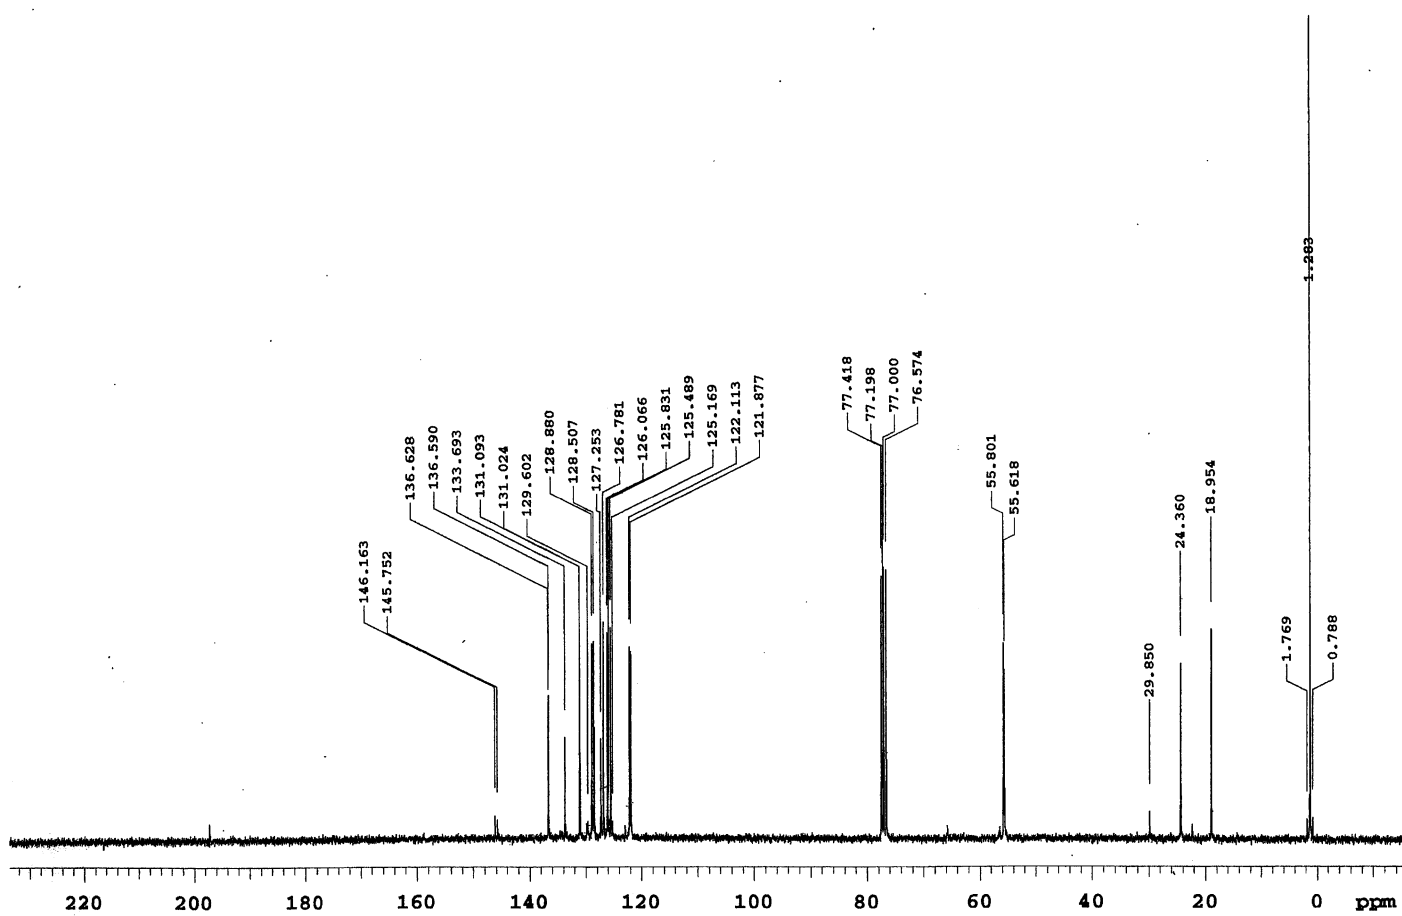

Fig S 28. <sup>1</sup>H and <sup>13</sup>C NMR spectra of **3b**.

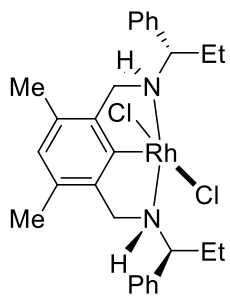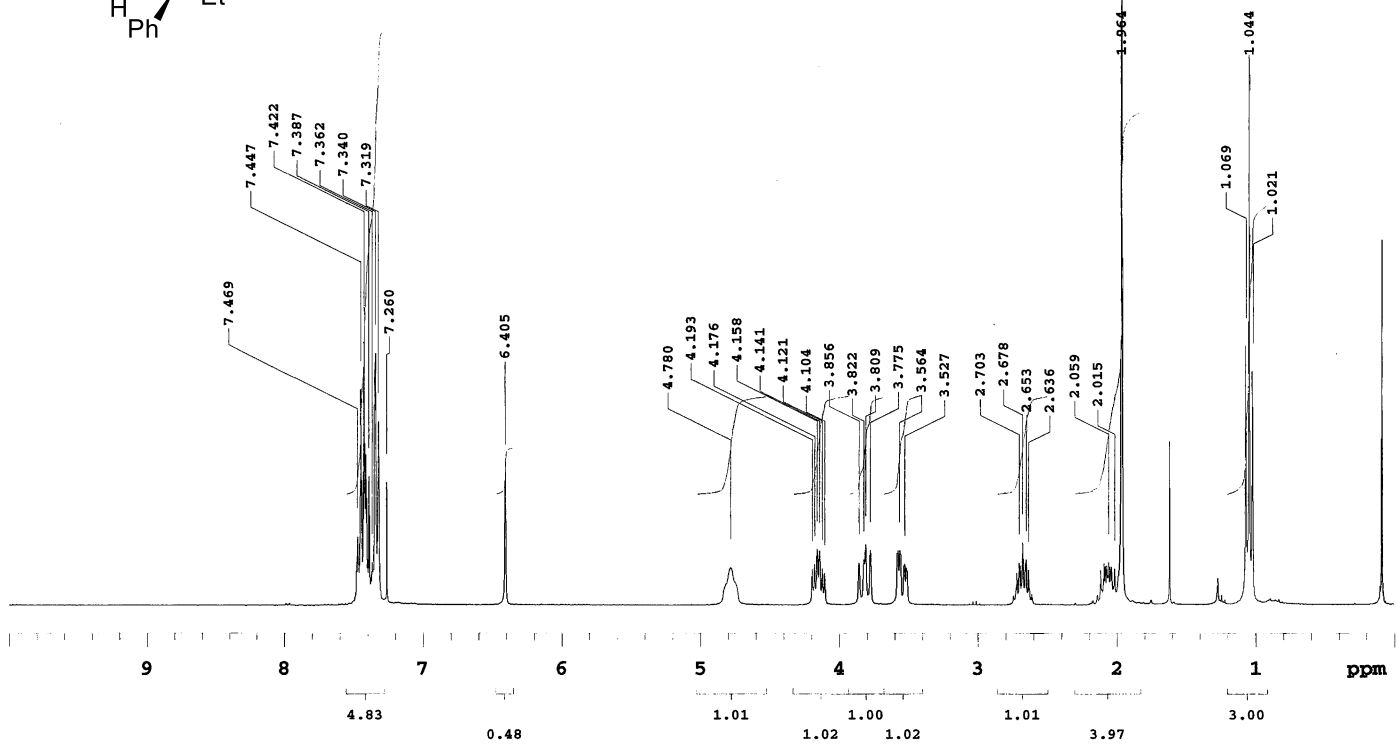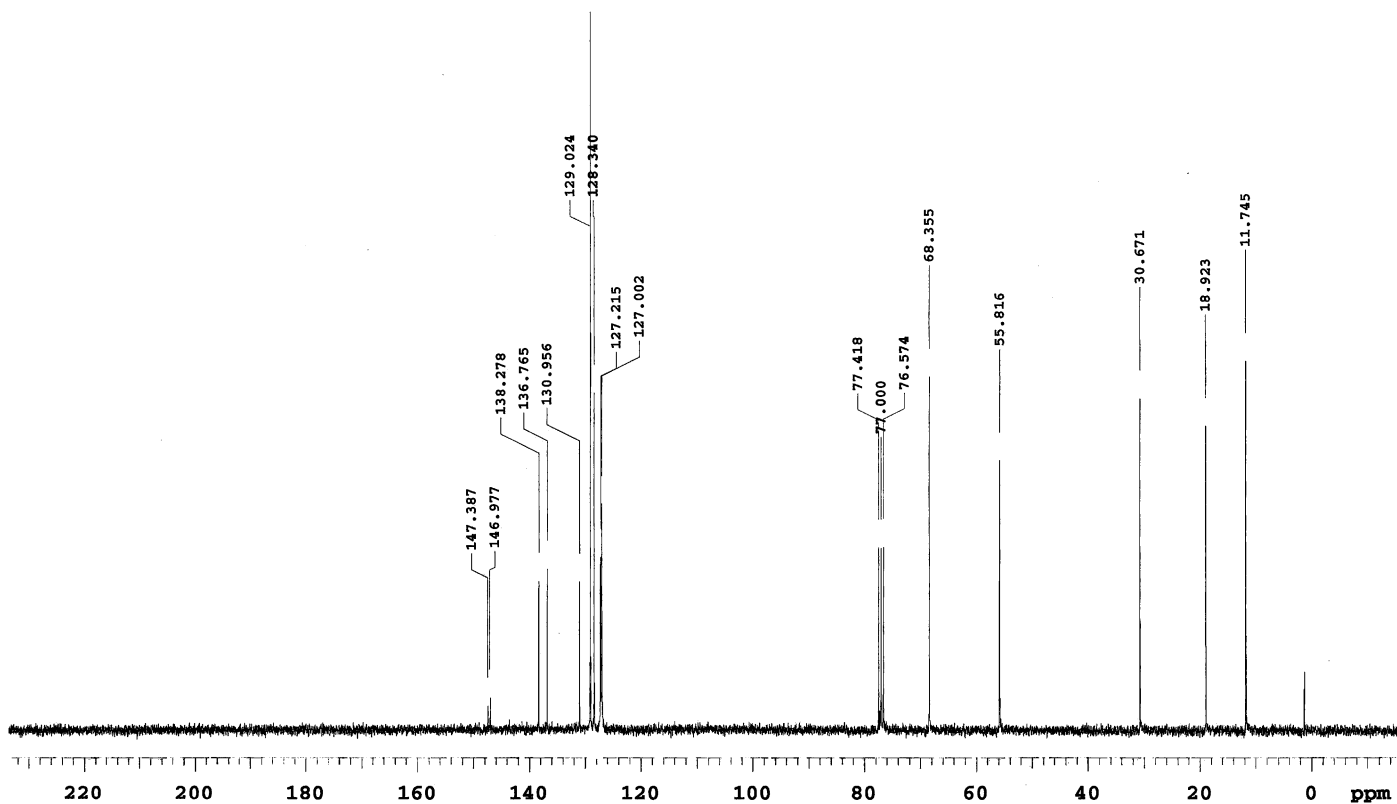

Fig S 29. <sup>1</sup>H and <sup>13</sup>C NMR spectra of **3c**.



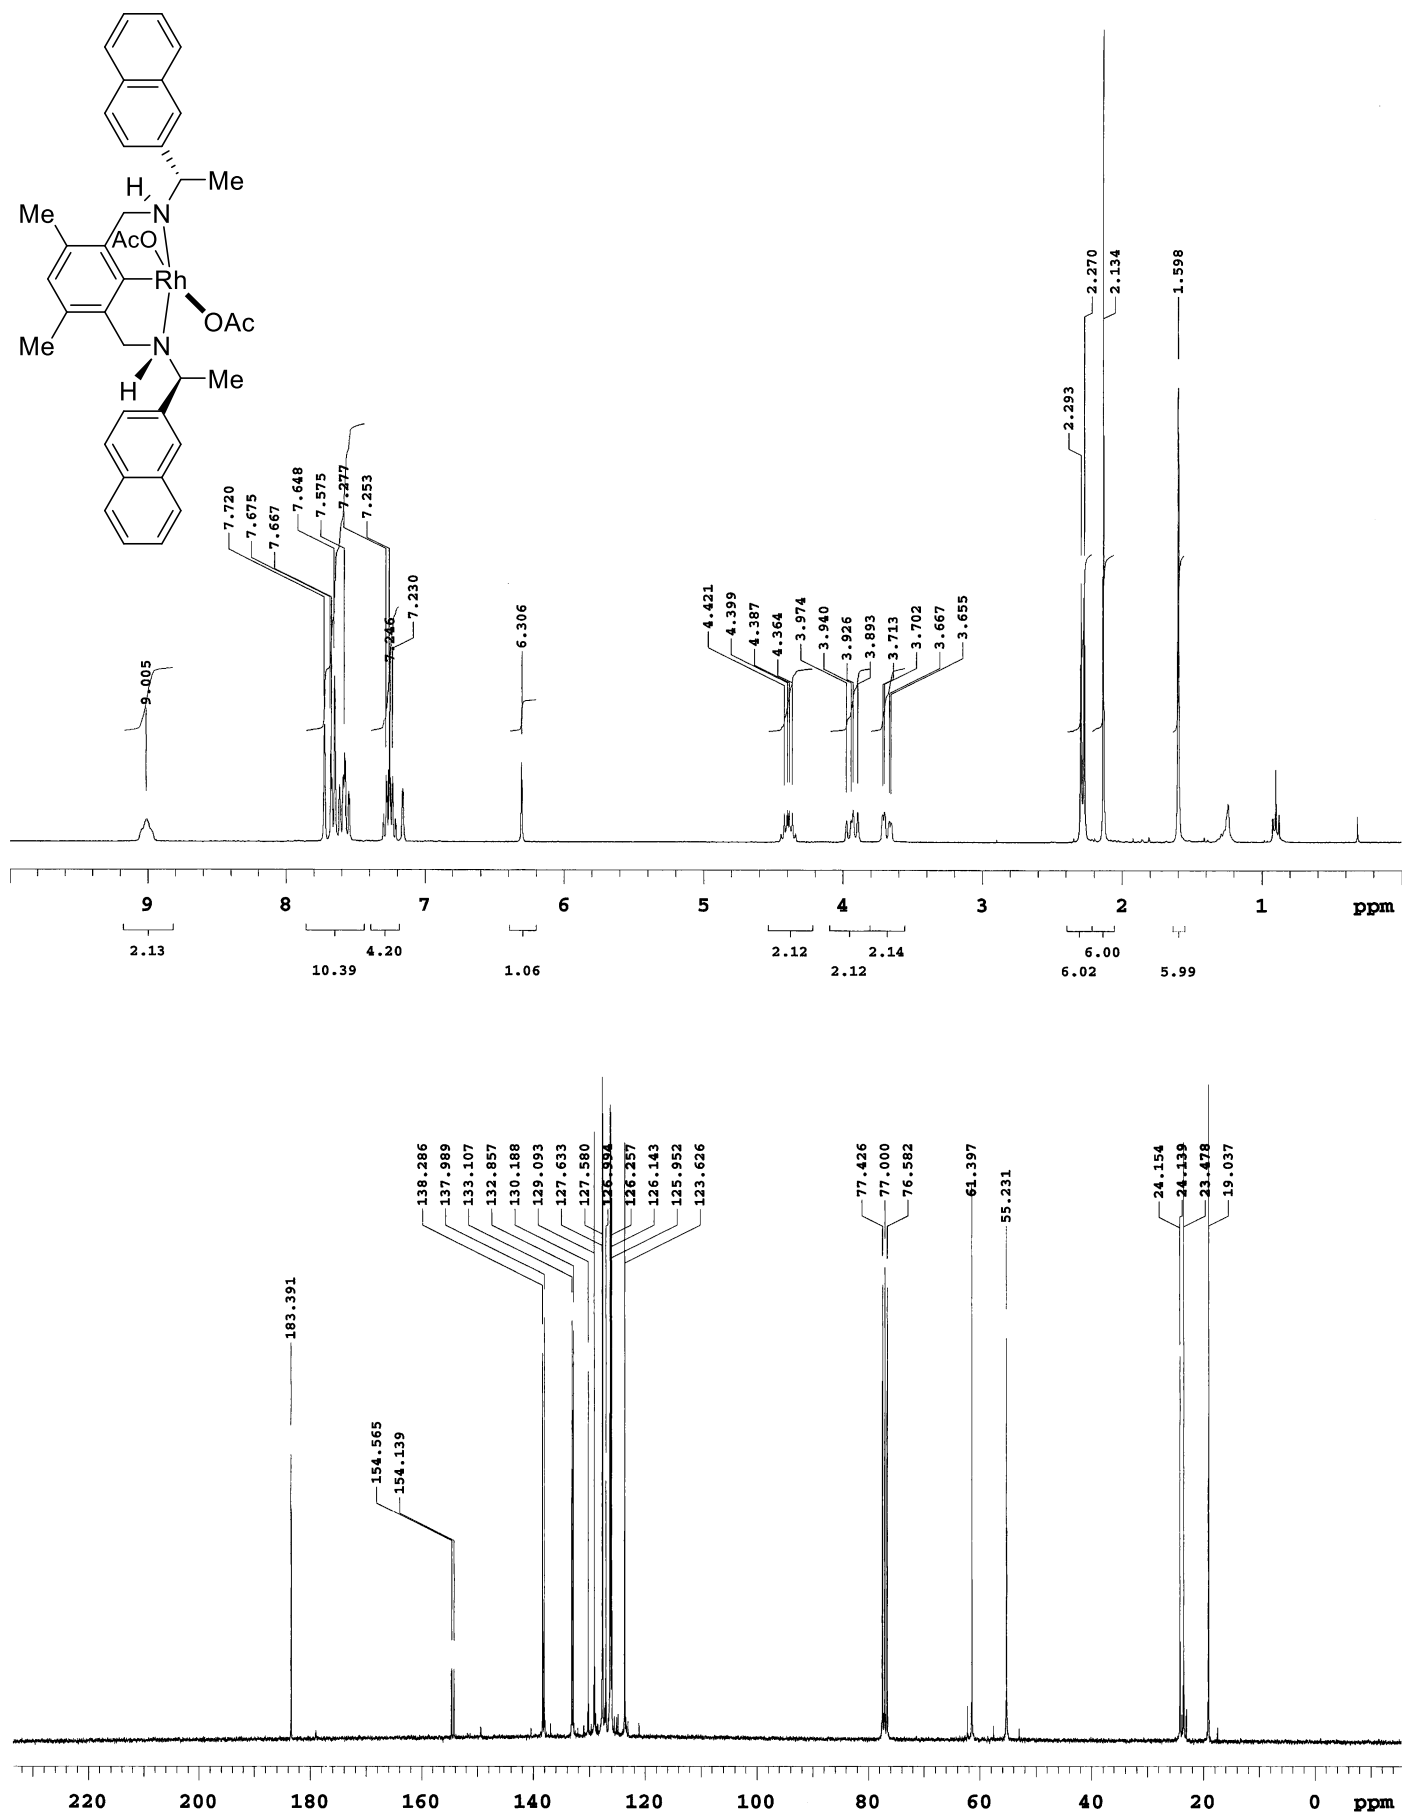

Fig S 31. <sup>1</sup>H and <sup>13</sup>C NMR spectra of **4b**.

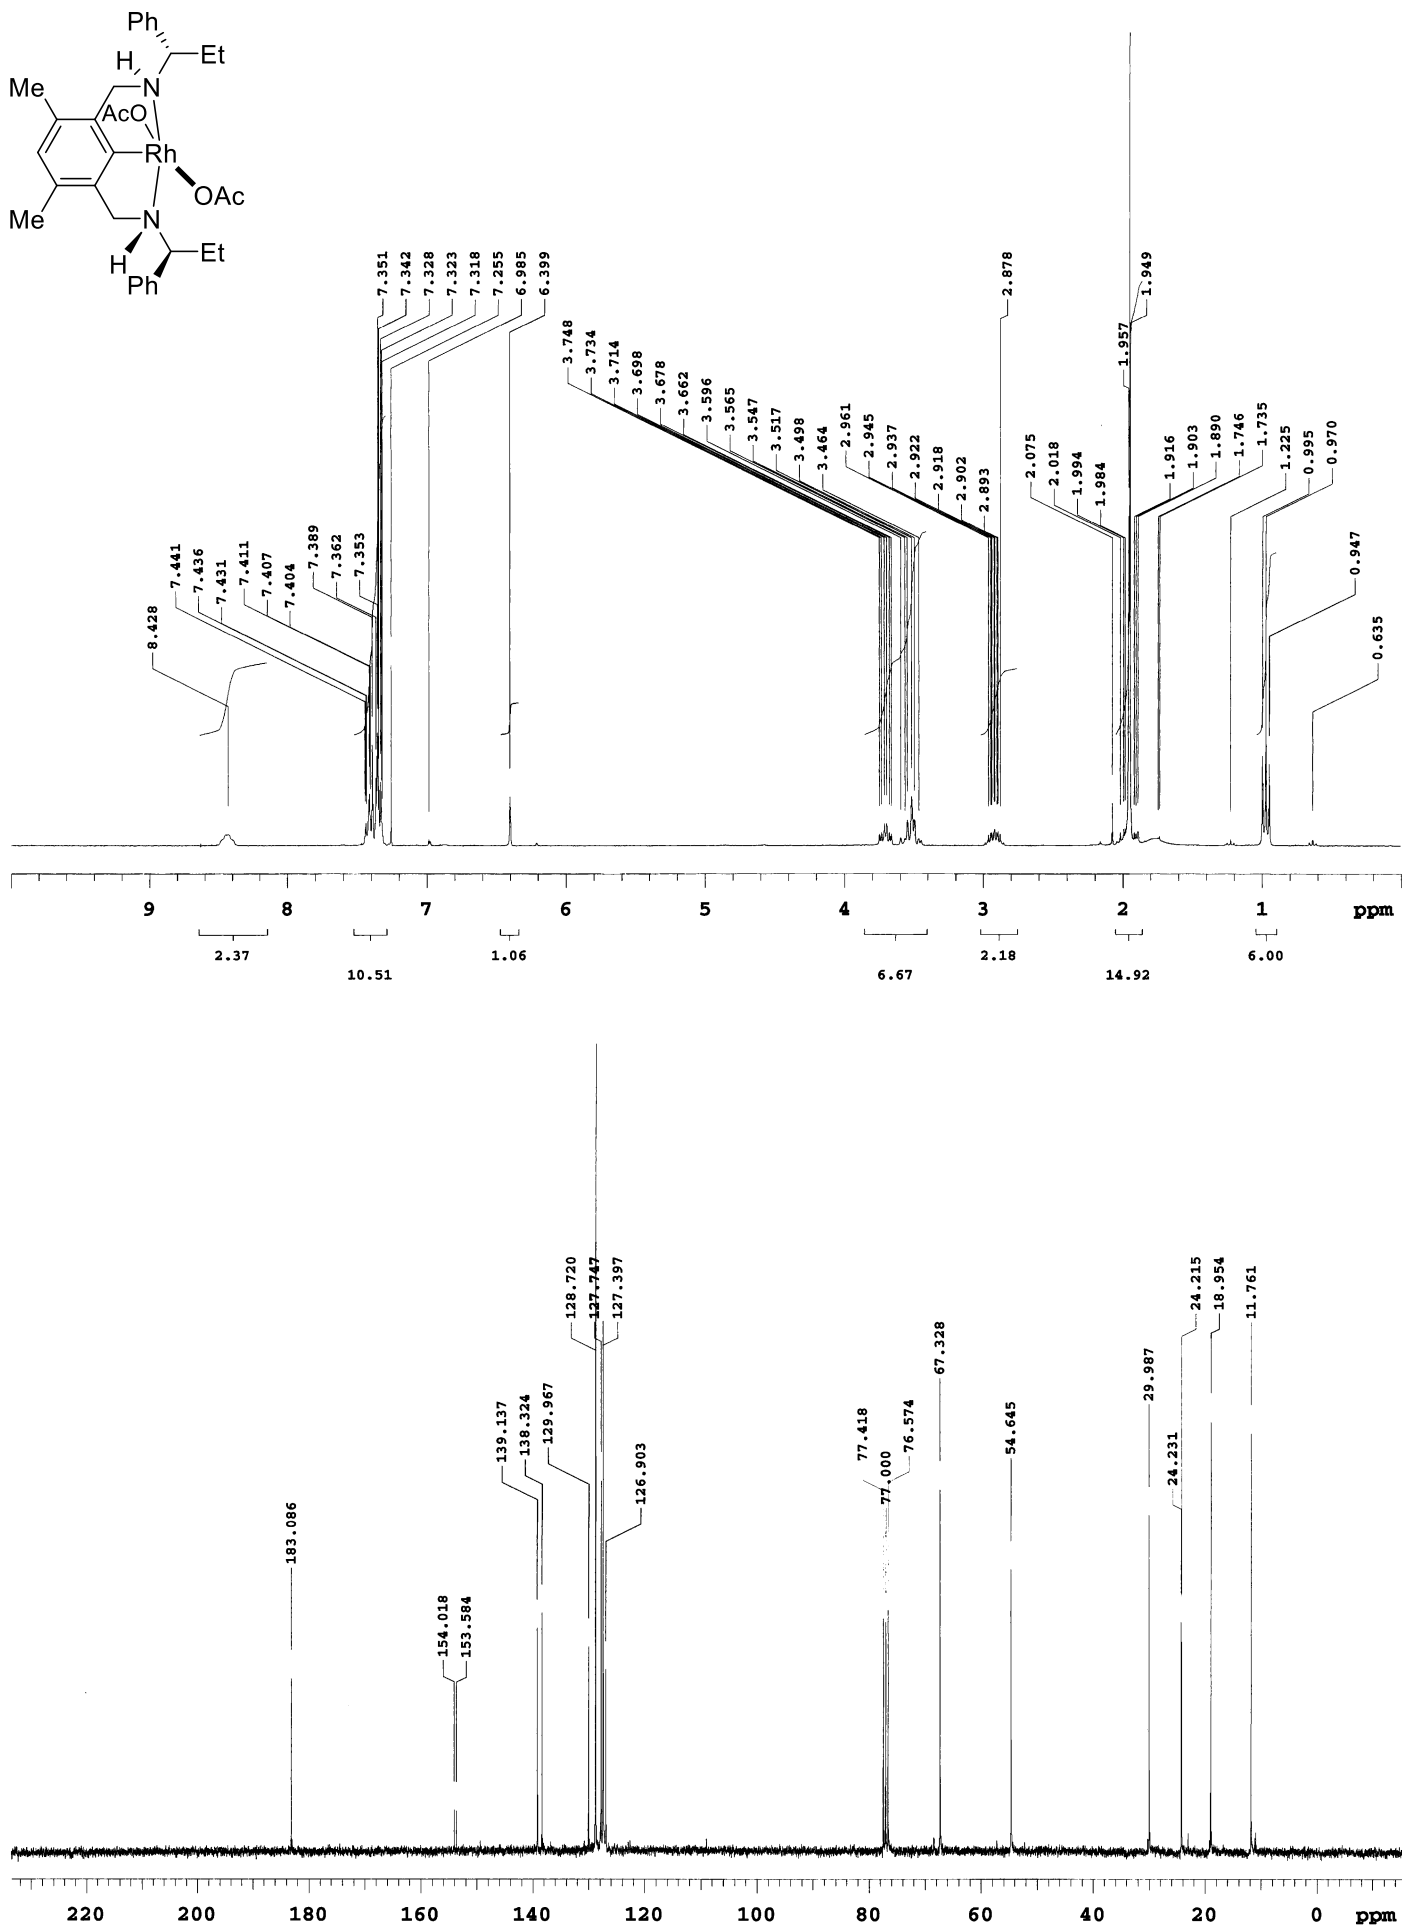

Fig S 32. <sup>1</sup>H and <sup>13</sup>C NMR spectra of 4c.

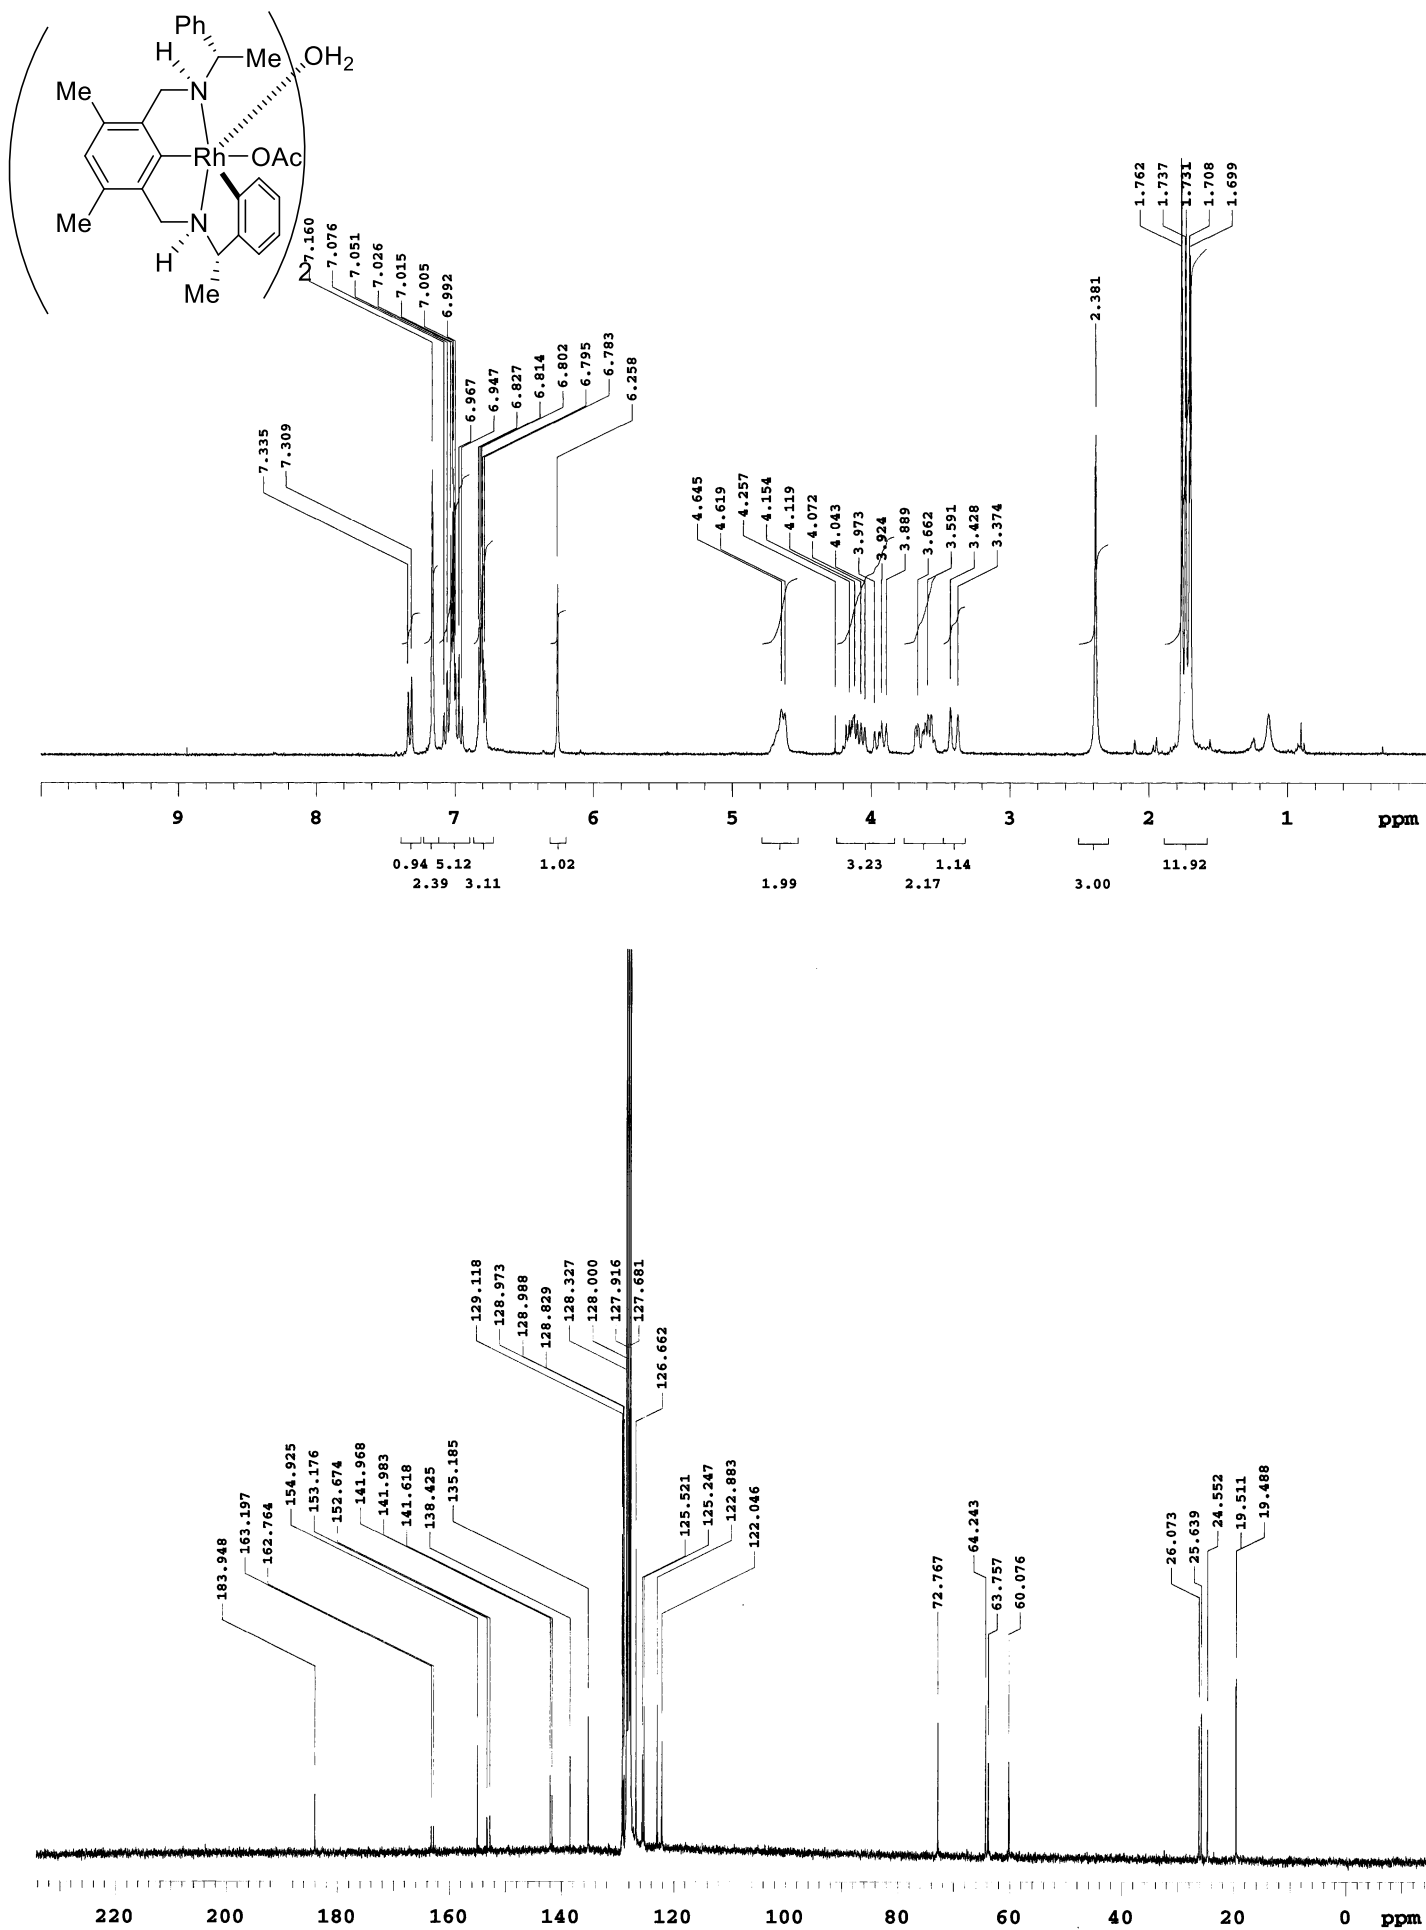

Fig S 33. <sup>1</sup>H and <sup>13</sup>C NMR spectra of 5.

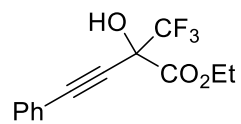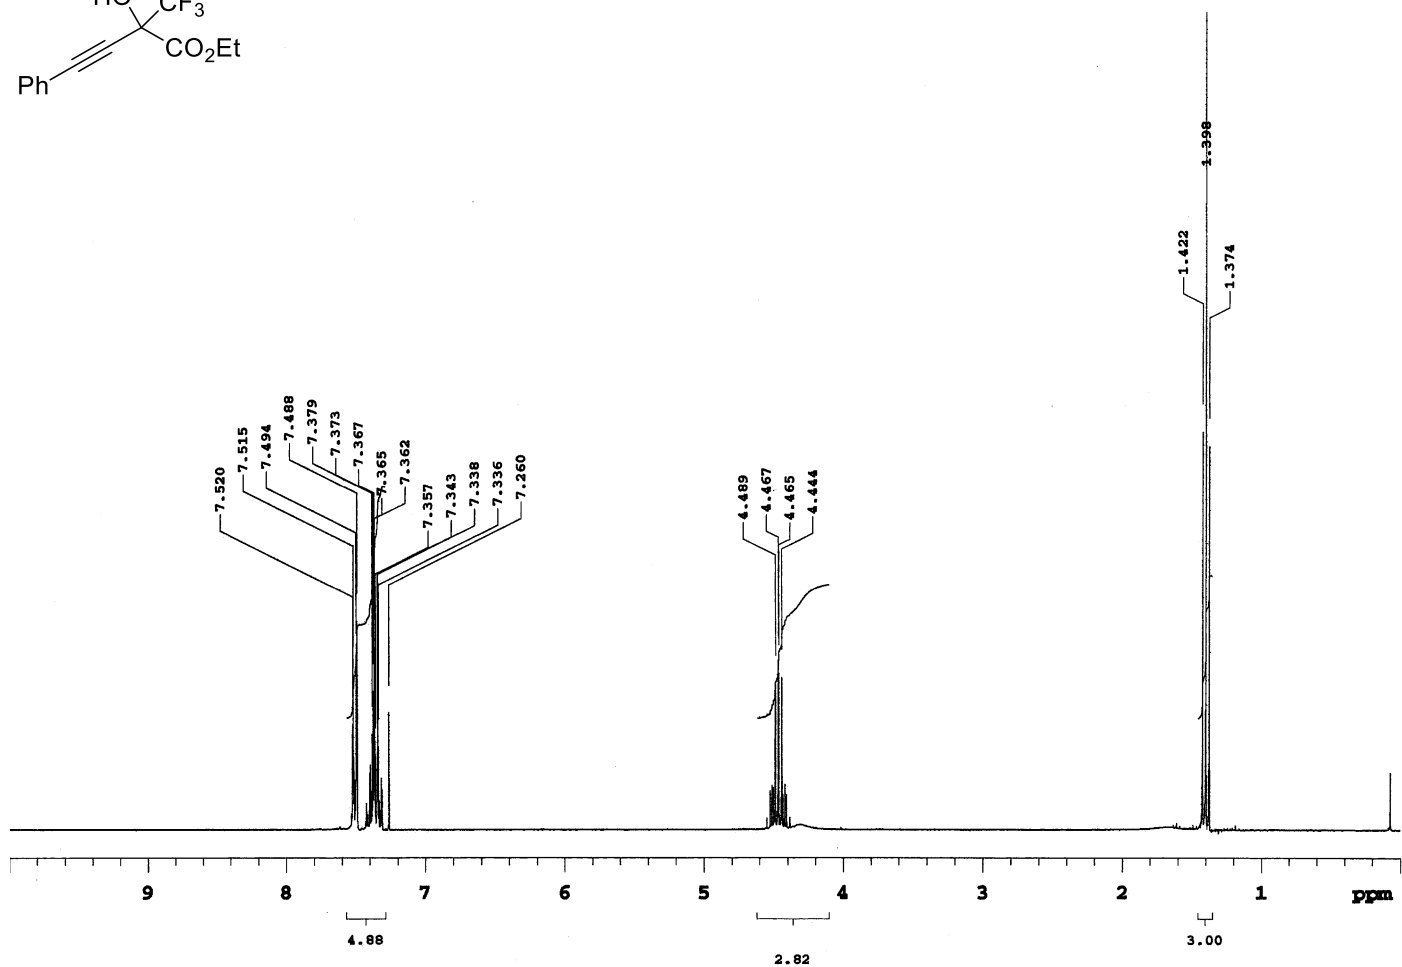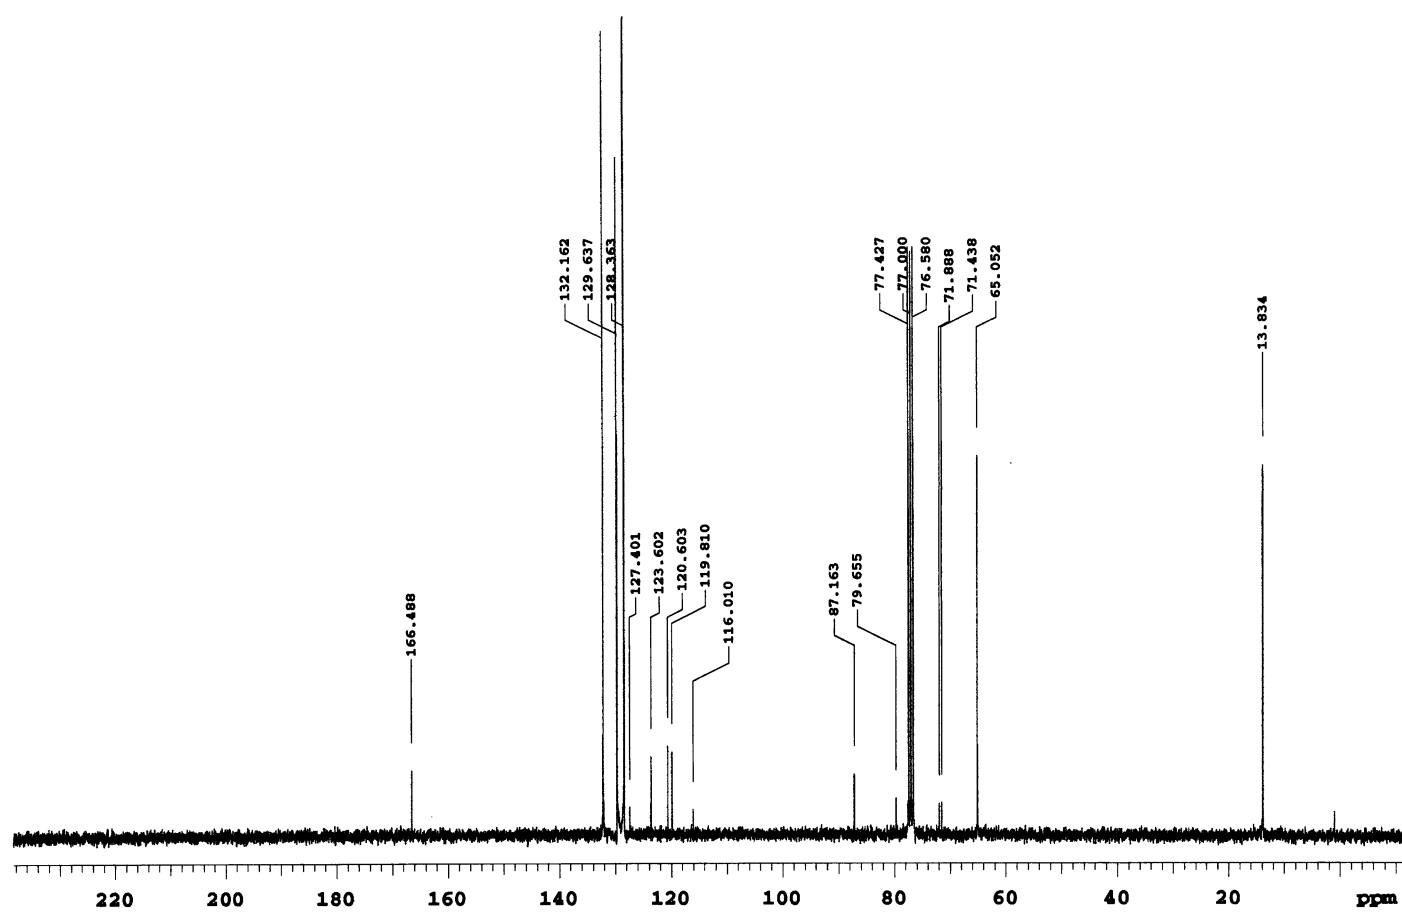

Fig S 34. <sup>1</sup>H and <sup>13</sup>C NMR spectra of 7a.



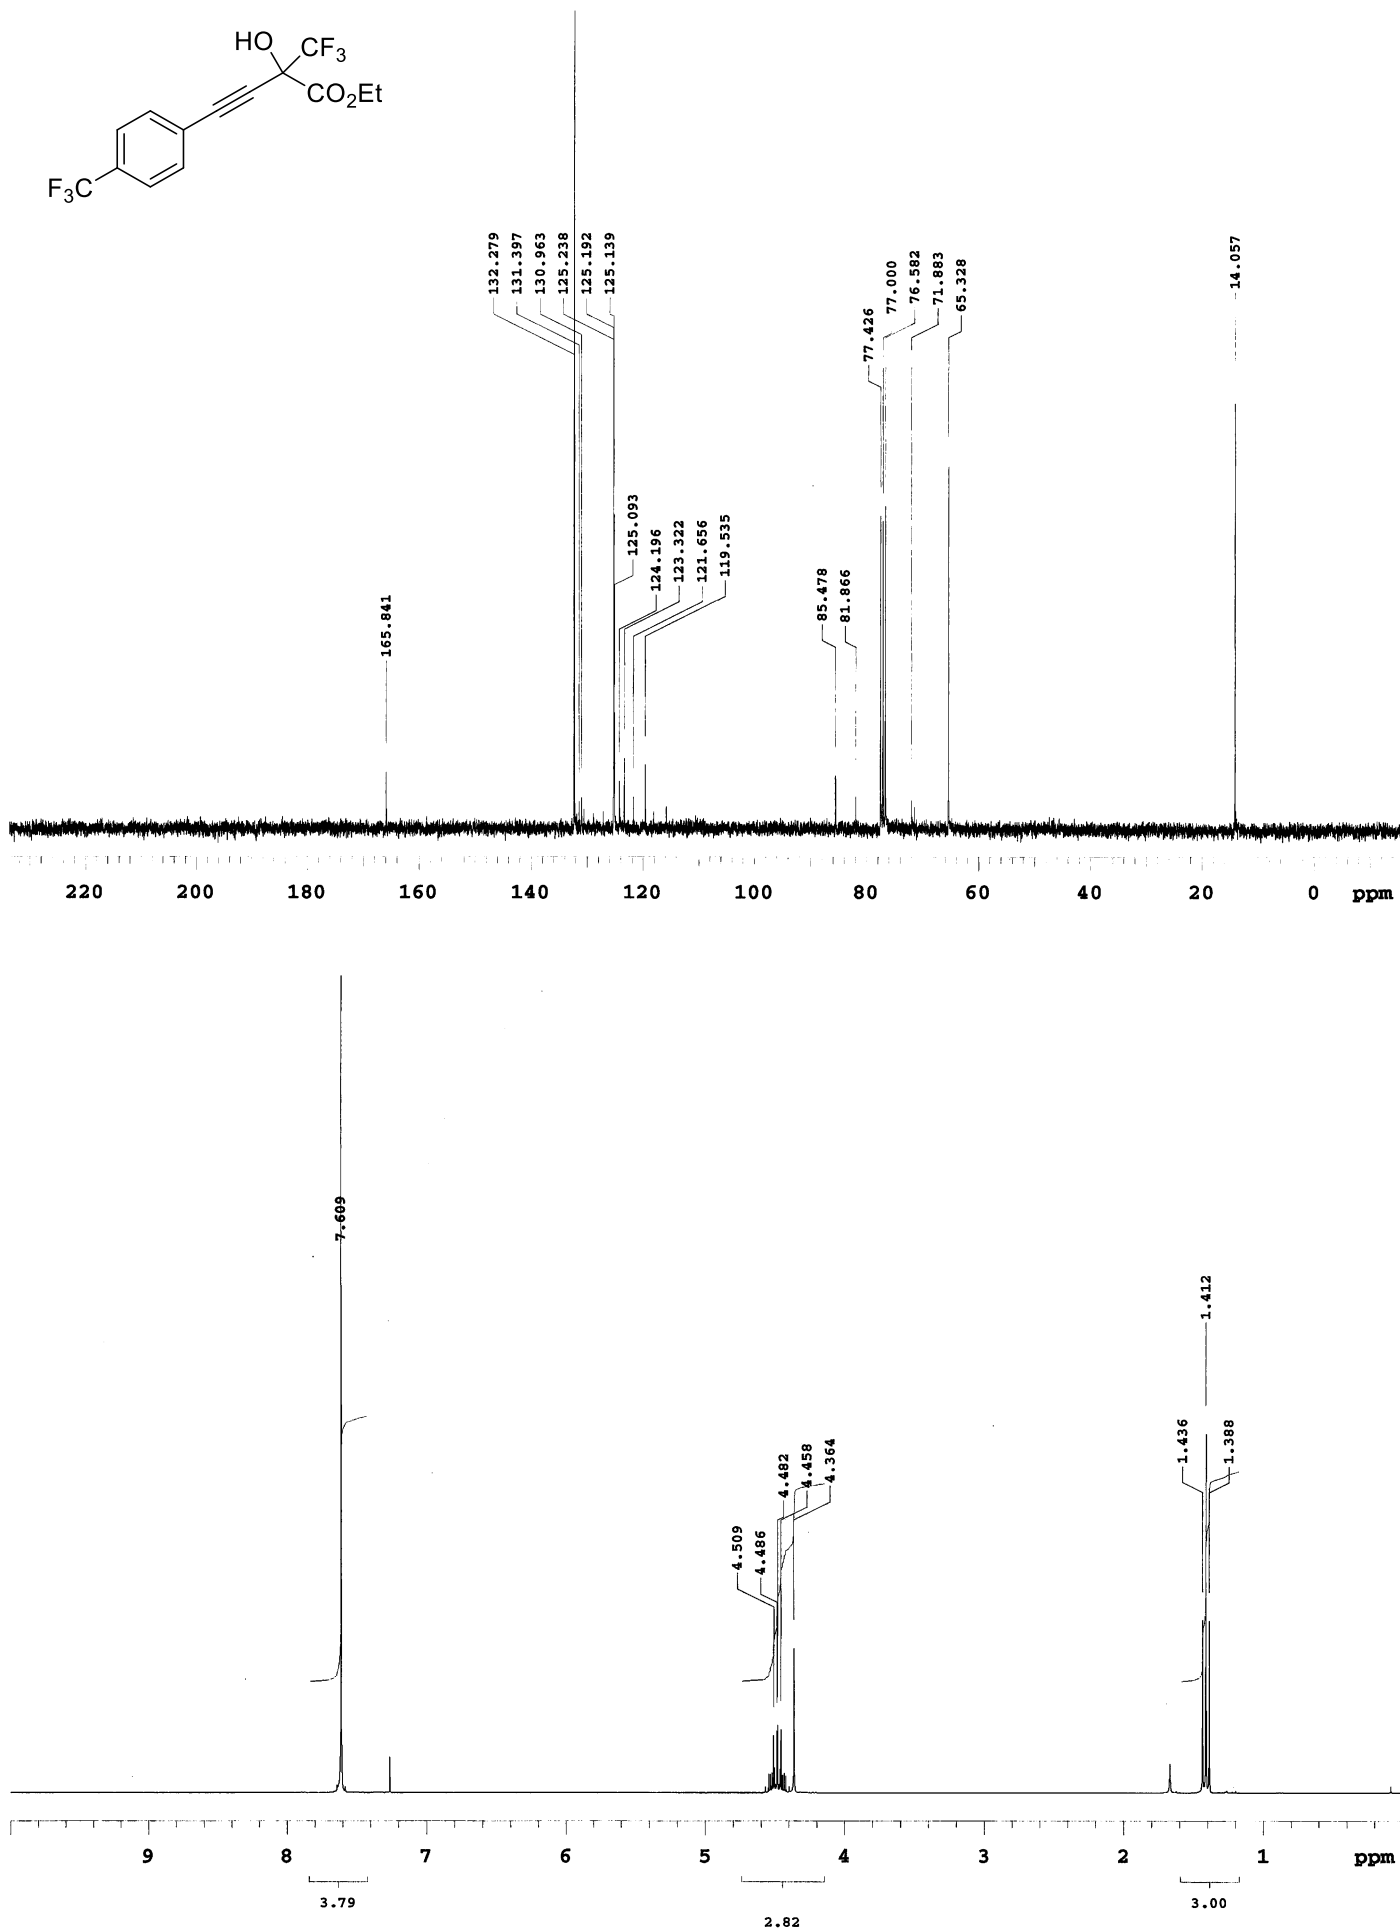

Fig S 35. <sup>1</sup>H and <sup>13</sup>C NMR spectra of **7b**.

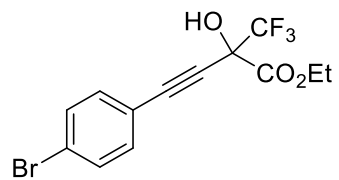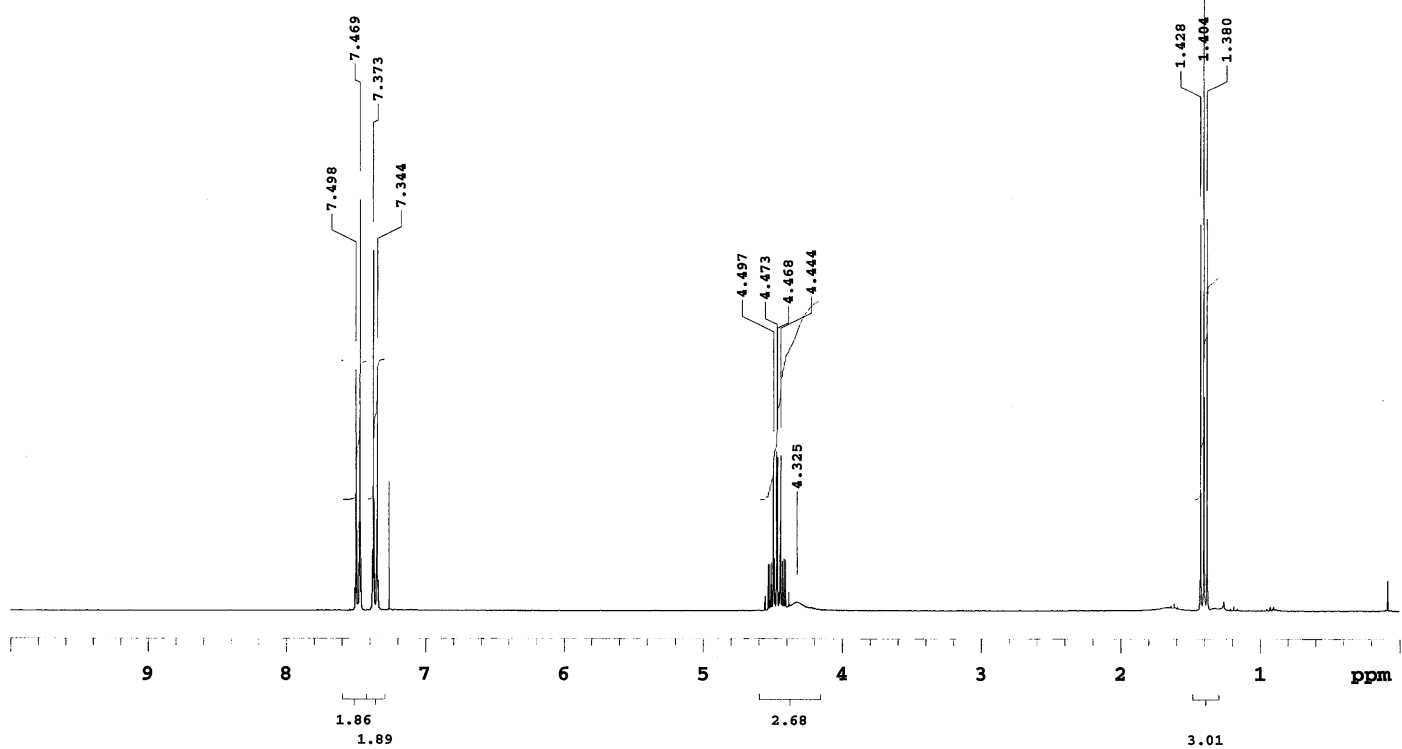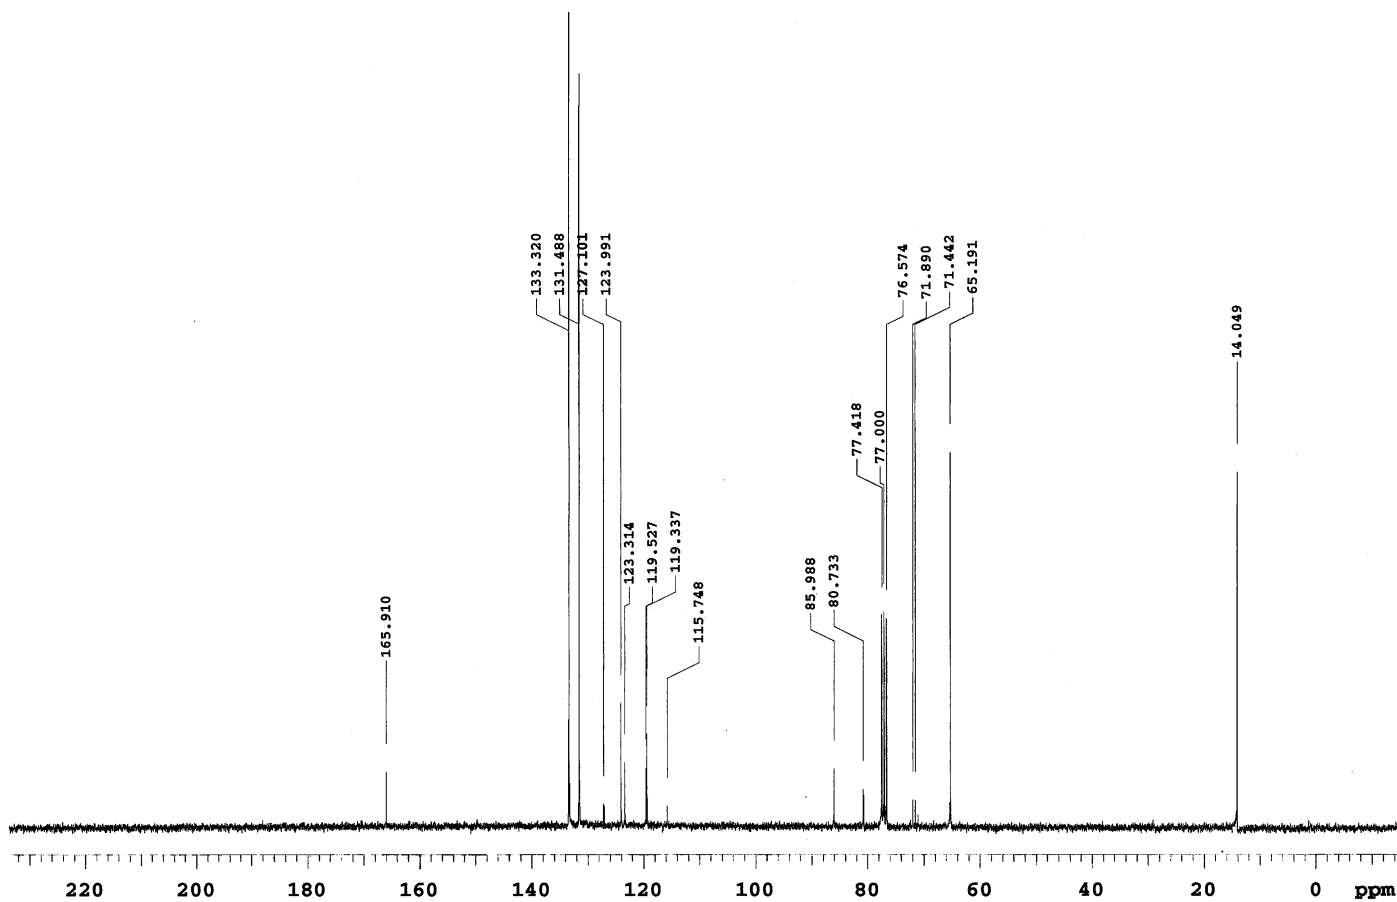

Fig S 36. <sup>1</sup>H and <sup>13</sup>C NMR spectra of 7c.

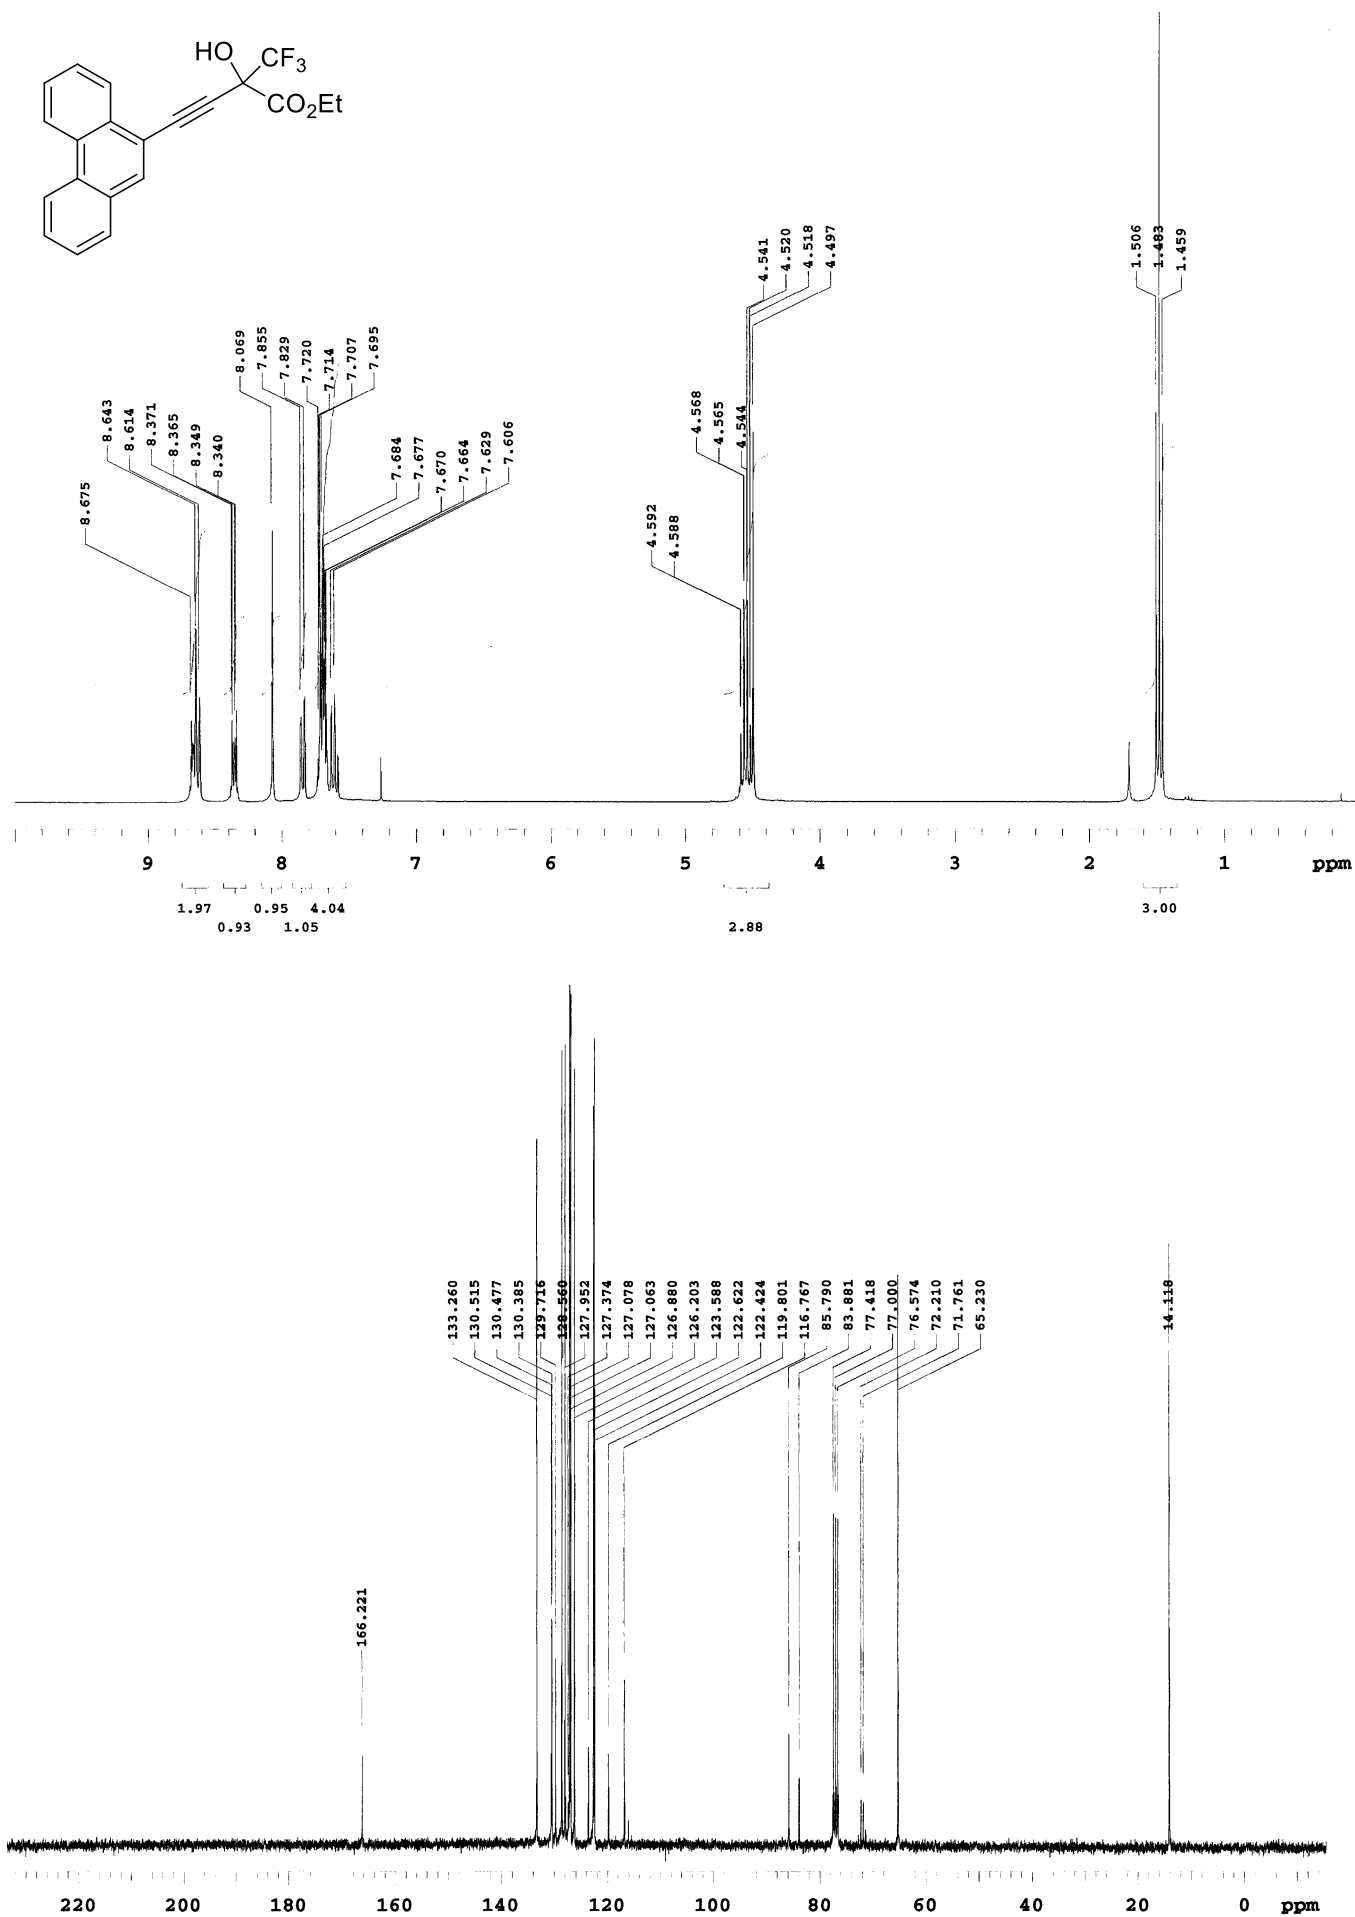

Fig S 37. <sup>1</sup>H and <sup>13</sup>C NMR spectra of 7d.

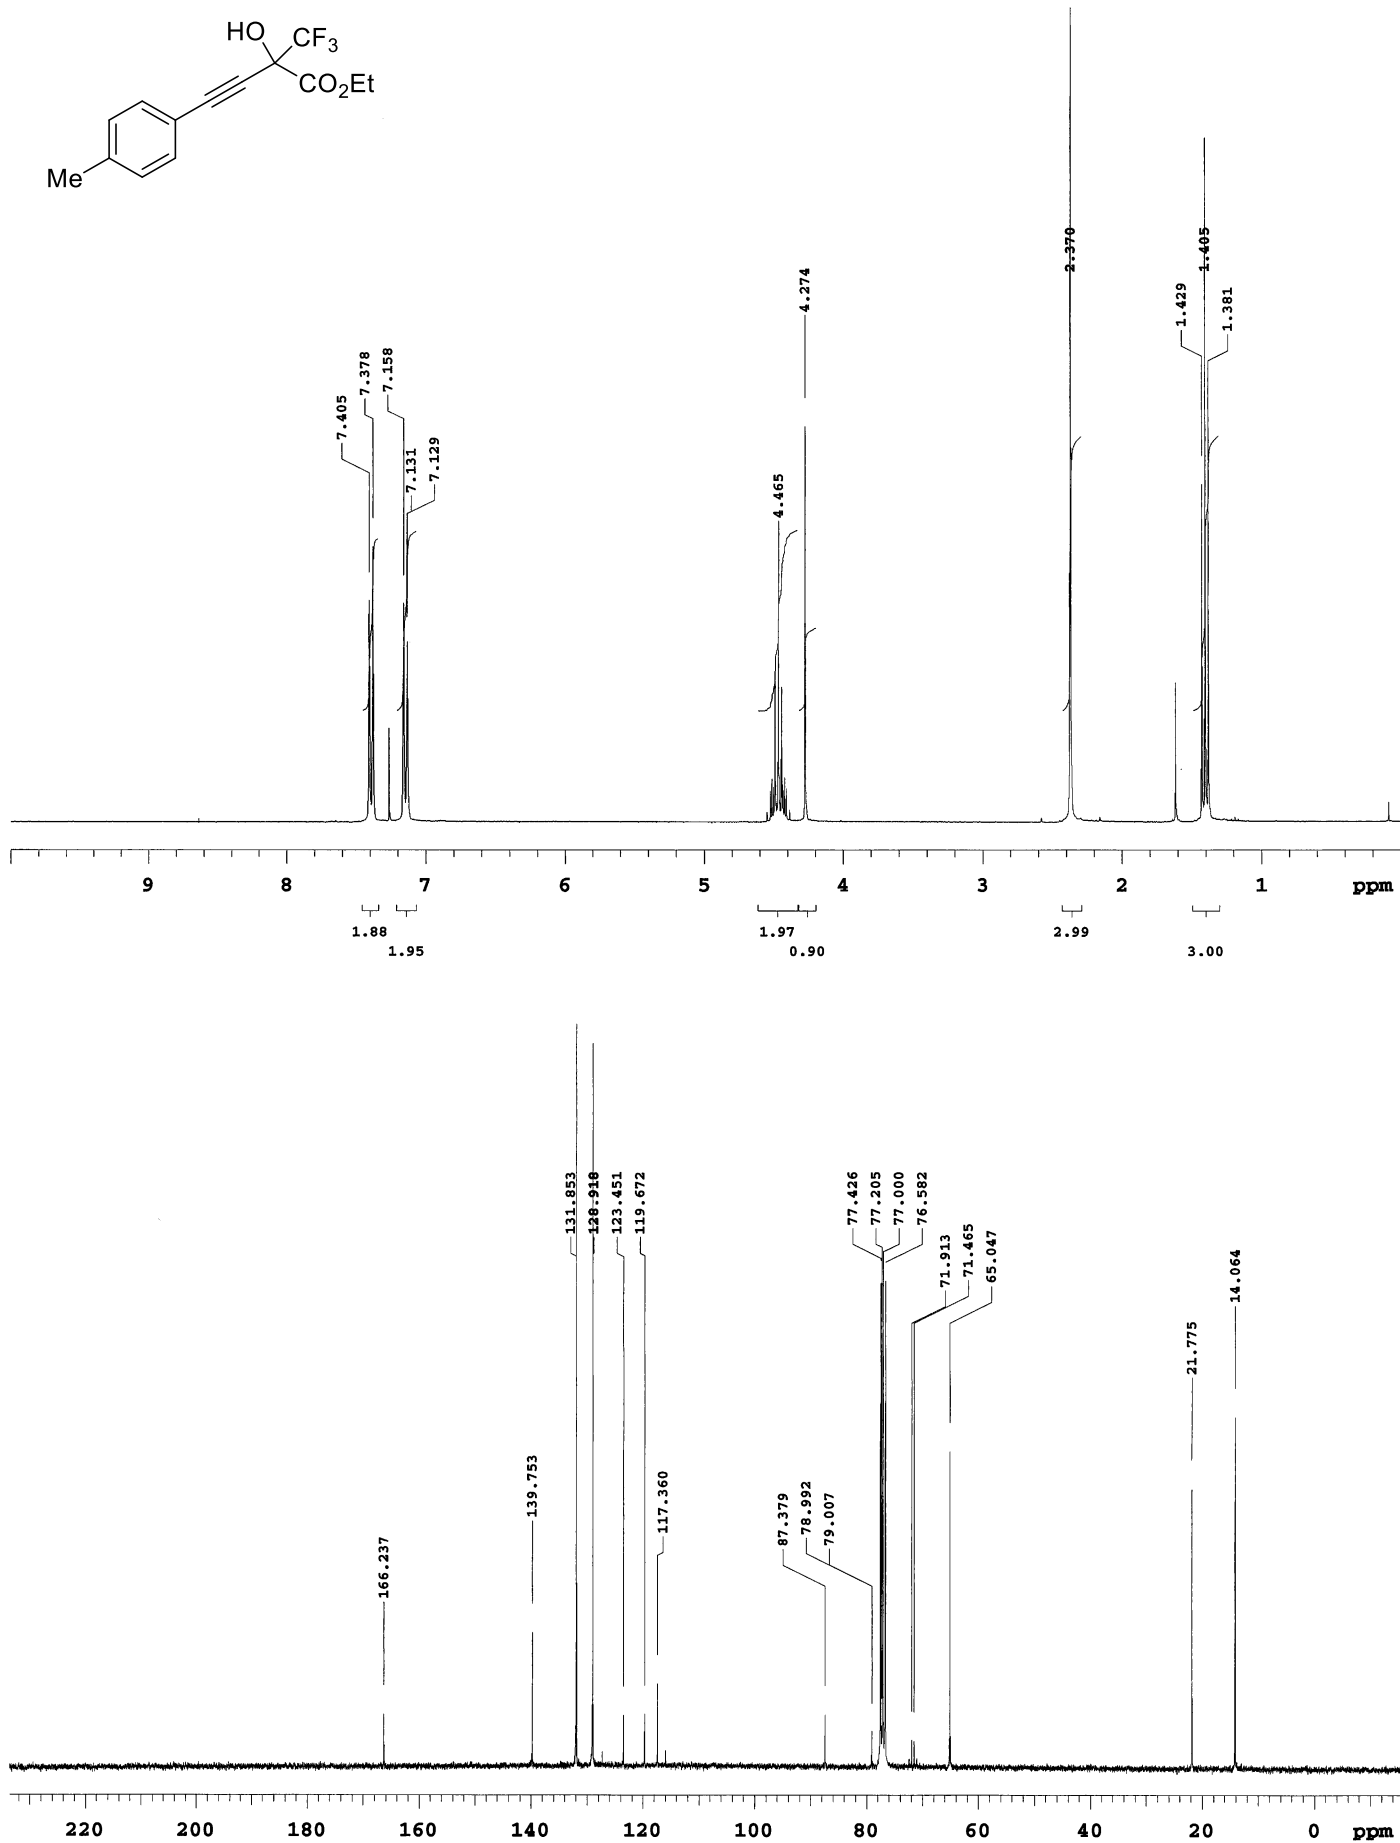

Fig S 38. <sup>1</sup>H and <sup>13</sup>C NMR spectra of 7e.

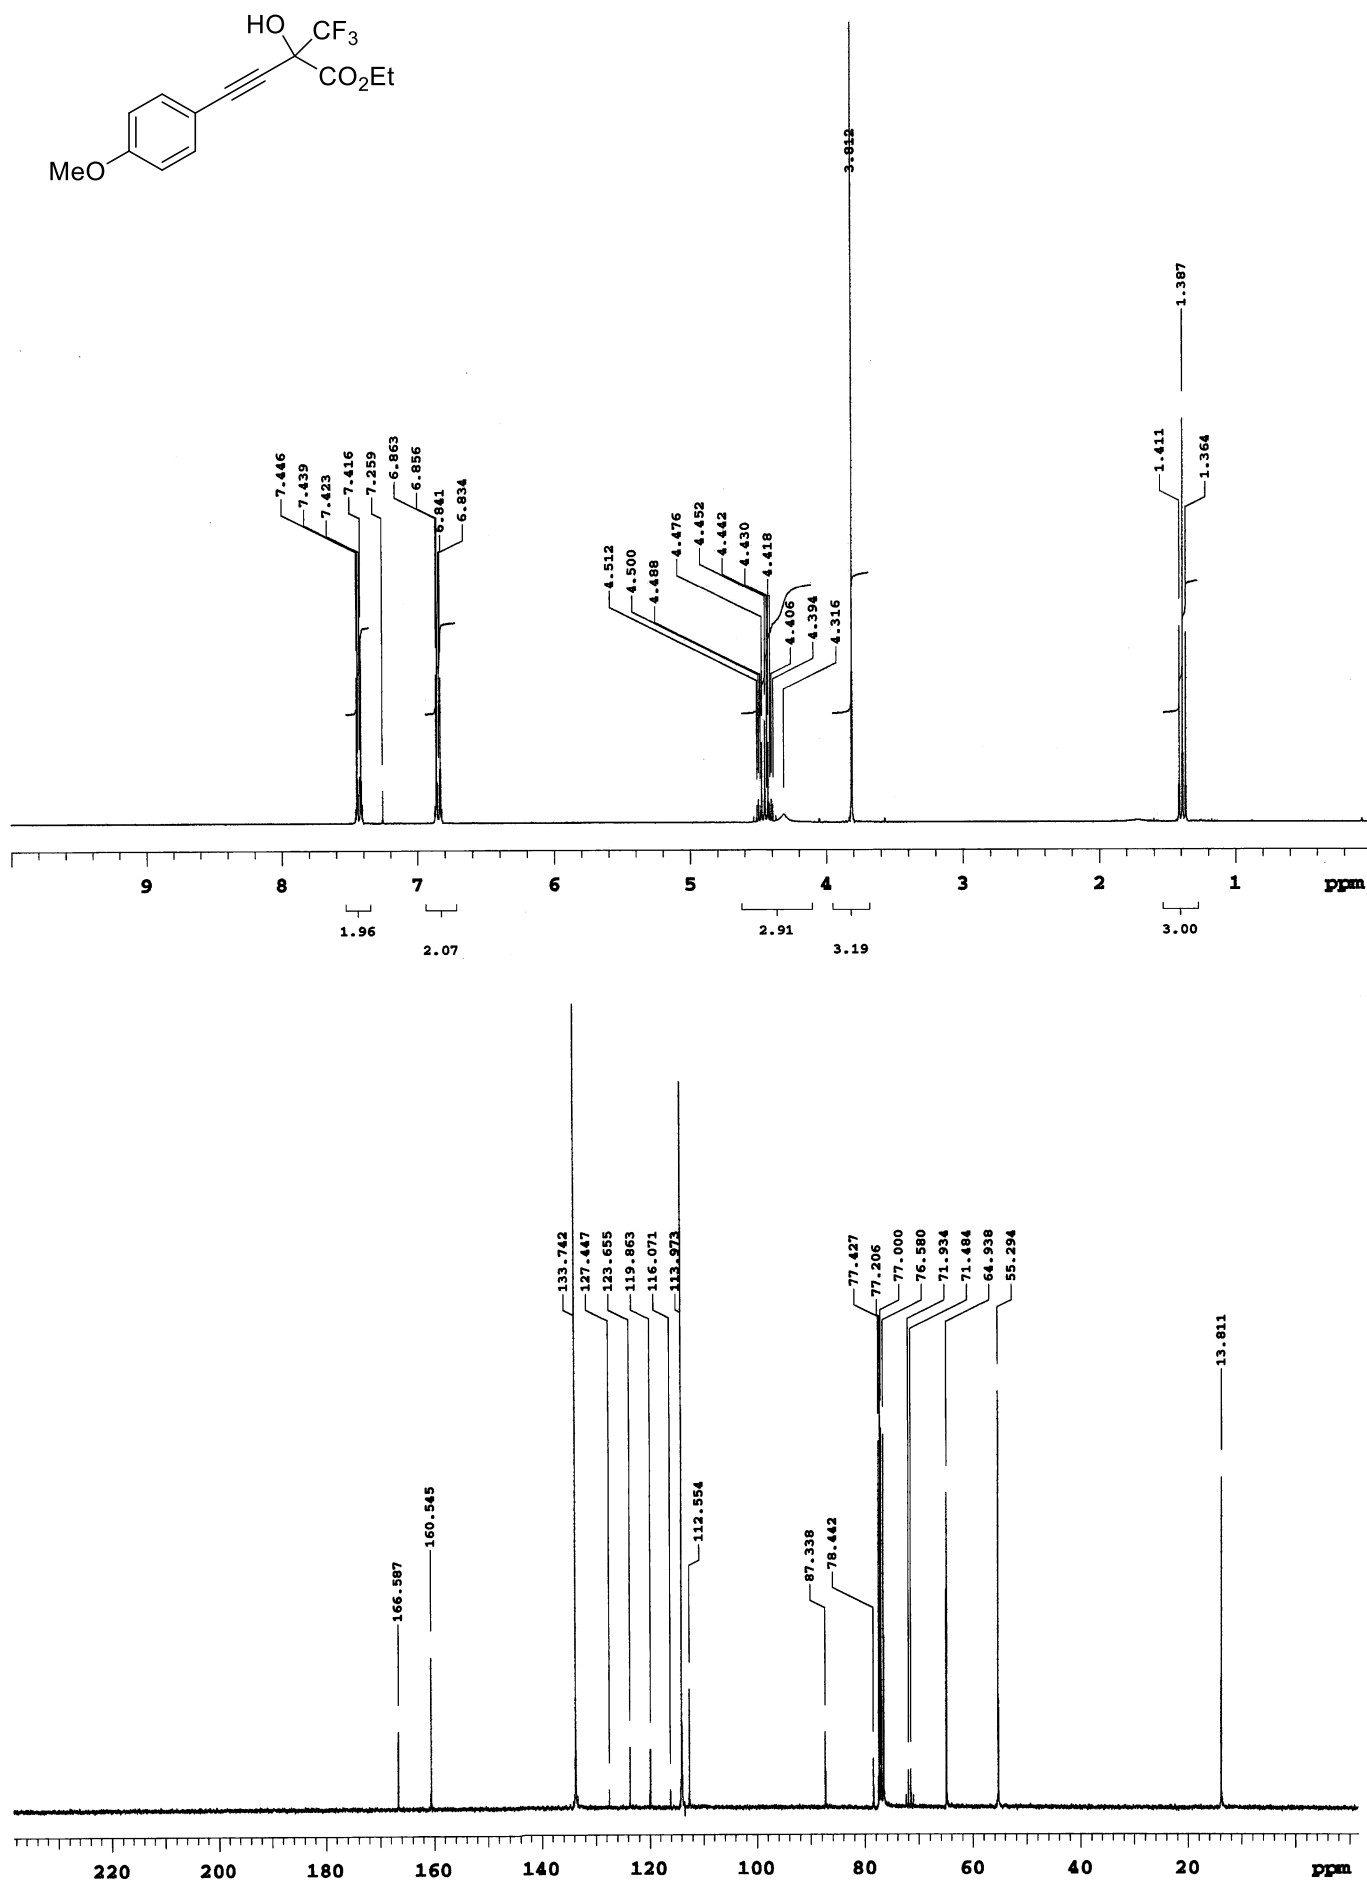

Fig S 39. <sup>1</sup>H and <sup>13</sup>C NMR spectra of 7f.

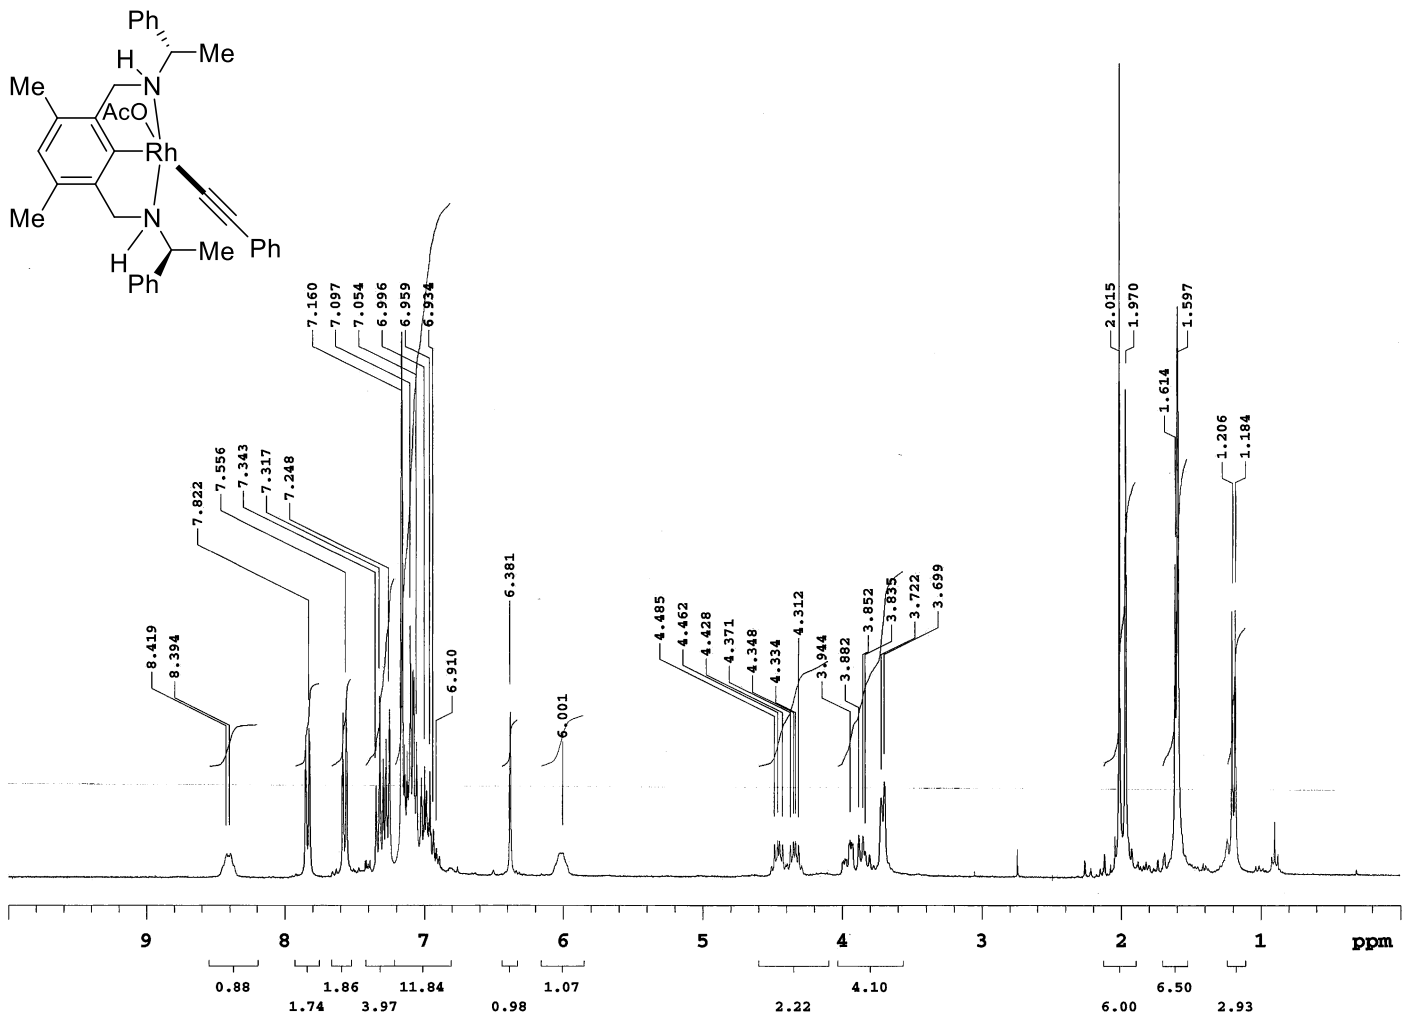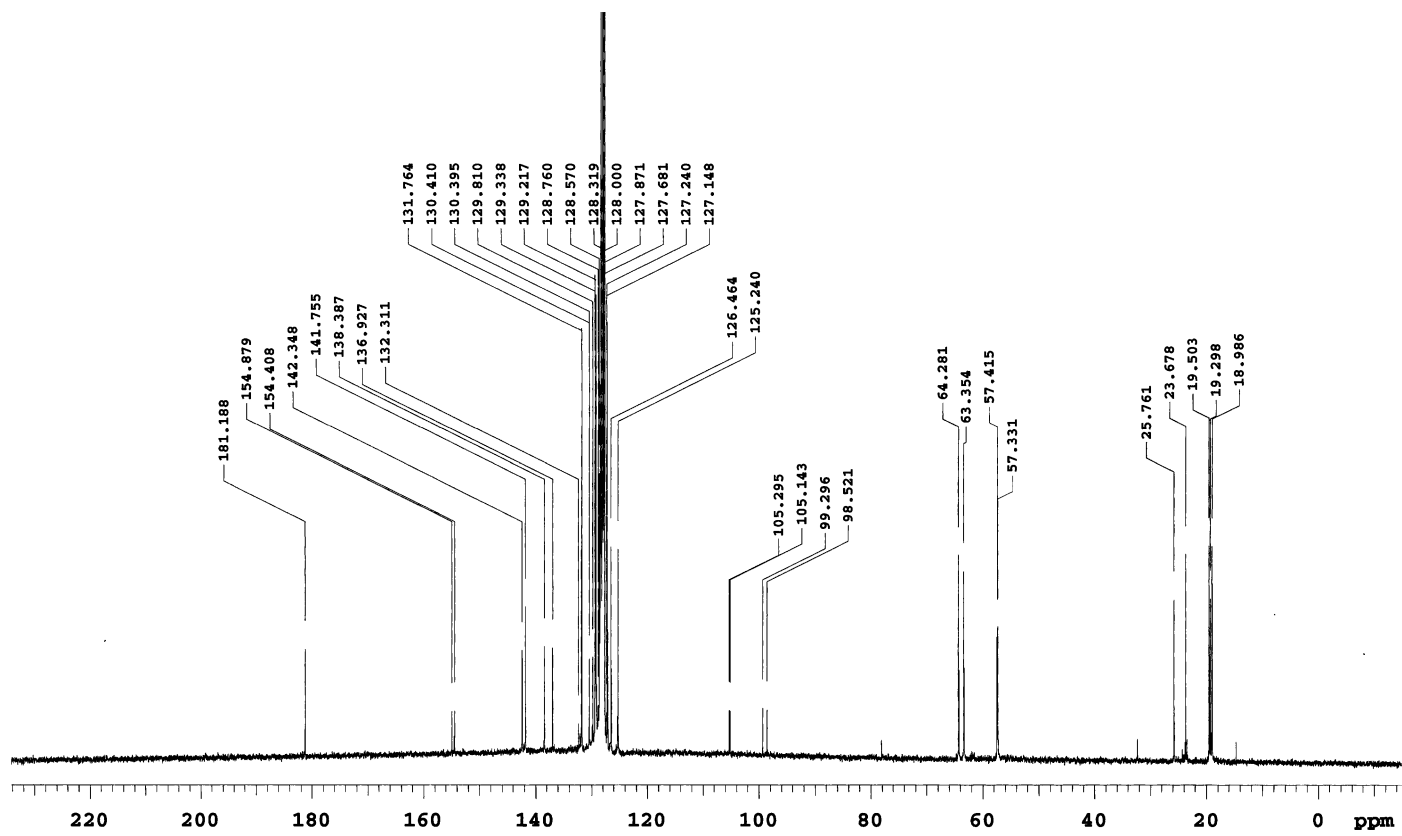

Fig S 40. <sup>1</sup>H and <sup>13</sup>C NMR spectra of **8**.
